# Supplementary material for: Commercial nano-enabled fertilizer: unveiling its mechanisms of toxicity in non-target soil invertebrate species using a high-throughput transcriptomics approach
Source: Royal Society of Chemistry journal article supplement (doi:10.1039/d5en00314h), 2025-01-01
Supplement: d5en00314h1.pdf [file d5en00314h1.pdf]

### **Supporting Information**

#### **Figures S1 to S14: KEGG graphs – rendered by Pathview.**

Each rectangle (corresponding to a gene) is divided in 3, corresponding to the different WELGRO® concentrations, as depicted:

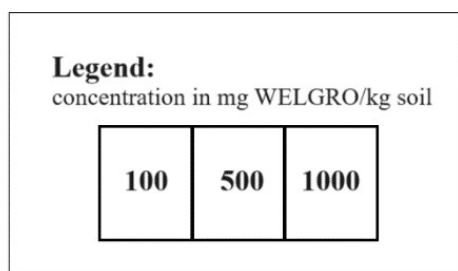

2 days:

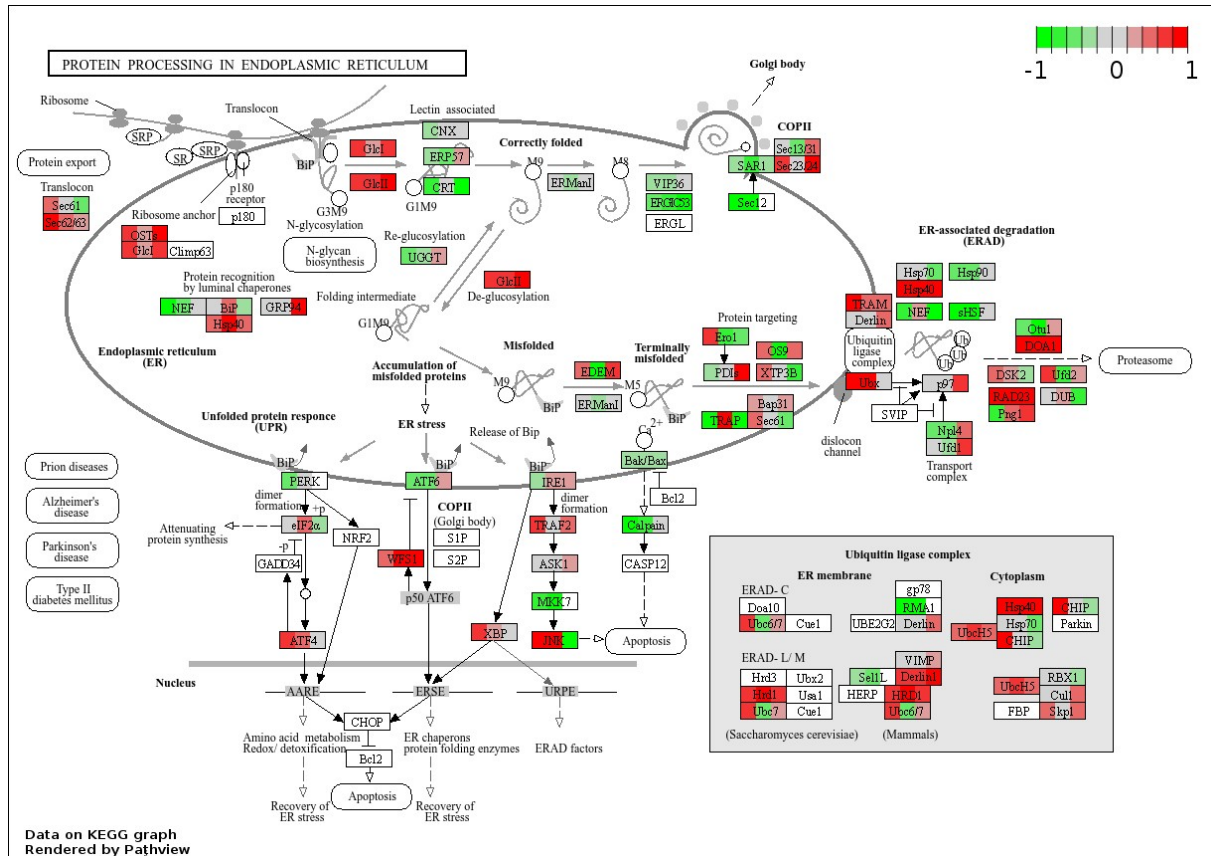

**Figure S1:** Fold-change (treatments versus control) of genes representing components of the “Protein processing in endoplasmic reticulum” KEGG pathway ko04141, as an example of pathways that are significantly affected in *Enchytraeus crypticus* exposed to WELGRO® for 2 days. Green and red indicate down- and up-regulation, respectively. Details in this pathway can be retrieved from the following website: <https://www.genome.jp/pathway/ko04141> (for interpretation of the references to colour in this figure legend, the reader is referred to the web version of this article).

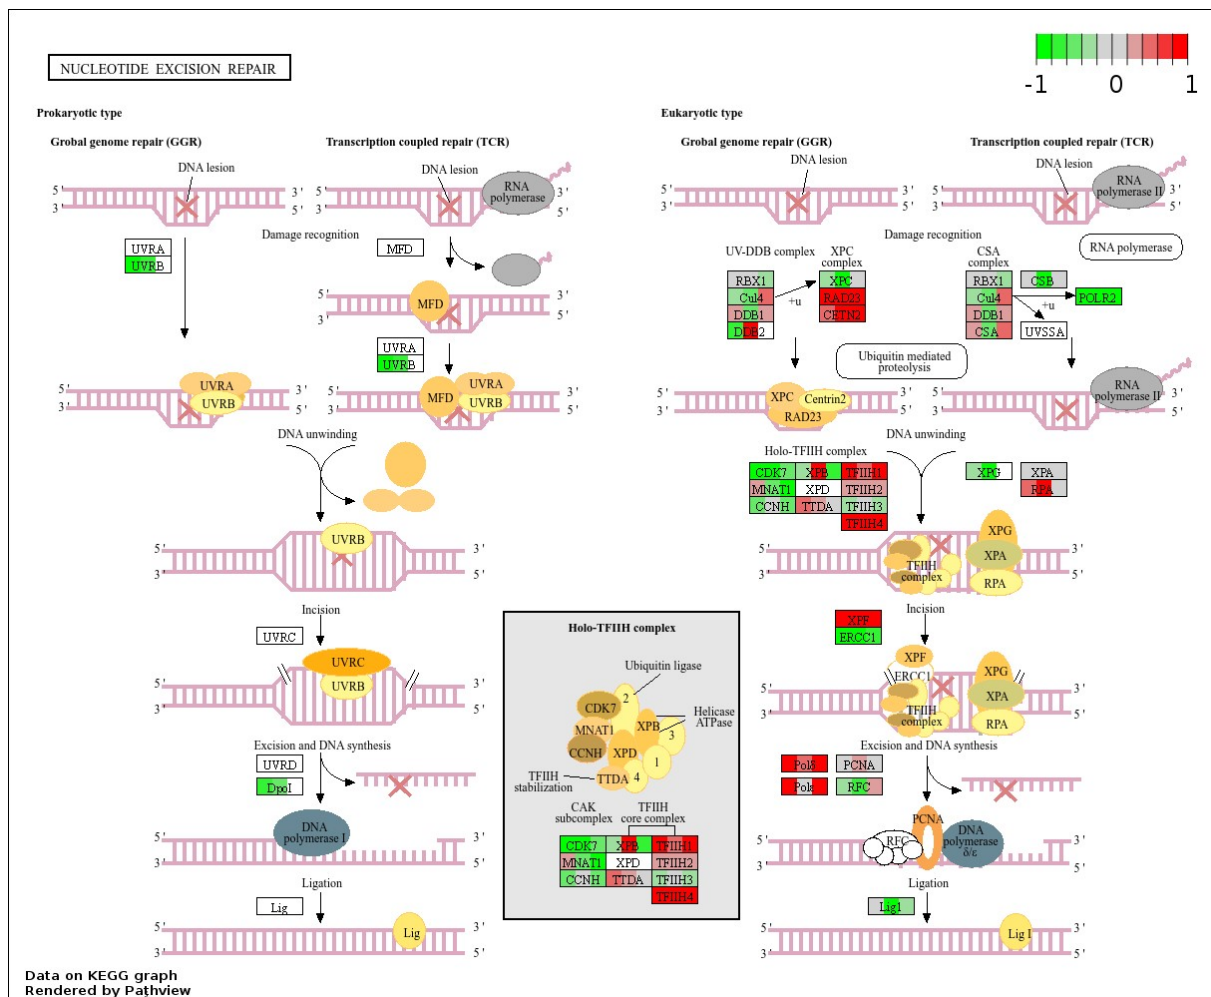

**Figure S2:** Fold-change (treatments versus control) of genes representing components of the “Nucleotide excision repair” KEGG pathway ko03420, as an example of pathways that are significantly affected in *Enchytraeus crypticus* exposed to WELGRO® for 2 days. Green and red indicate down- and up-regulation, respectively. Details in this pathway can be retrieved from the following website: <https://www.genome.jp/pathway/ko03420> (for interpretation of the references to colour in this figure legend, the reader is referred to the web version of this article).

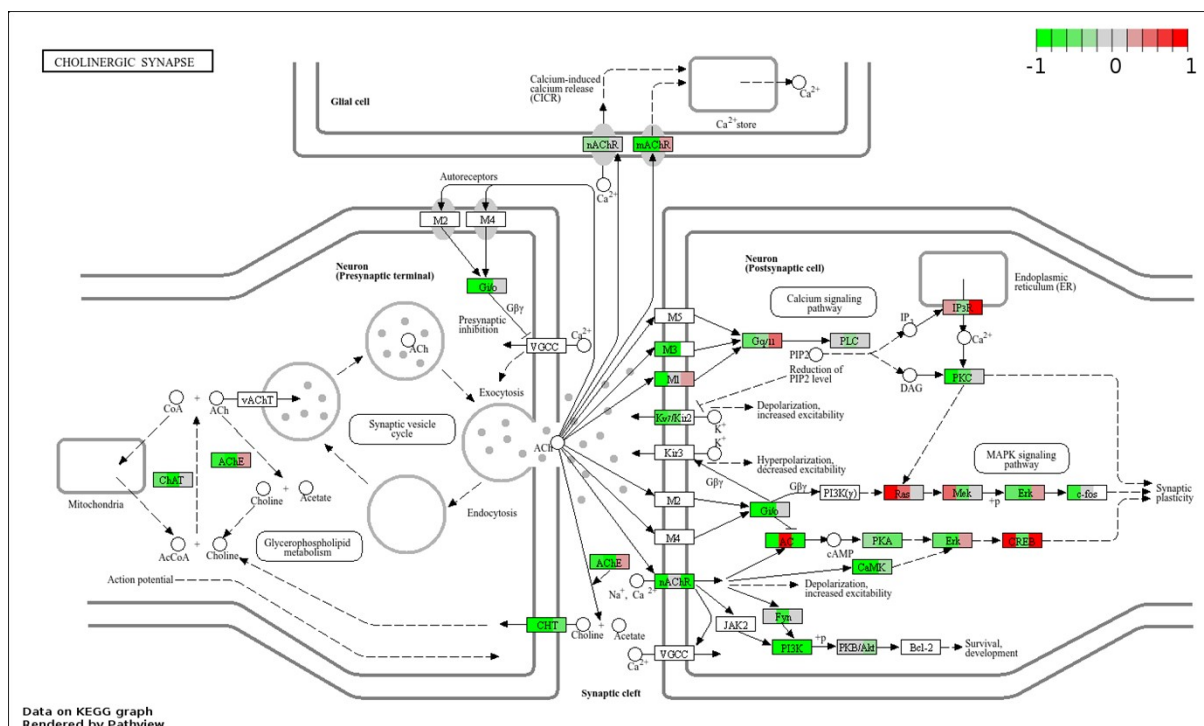

**Figure S3:** Fold-change (treatments versus control) of genes representing components of the “Cholinergic synapse” KEGG pathway ko04725, as an example of pathways that are significantly affected in *Enchytraeus crypticus* exposed to WELGRO® for 2 days. Green and red indicate down- and up-regulation, respectively. Details in this pathway can be retrieved from the following website: <https://www.genome.jp/pathway/ko04725> (for interpretation of the references to colour in this figure legend, the reader is referred to the web version of this article).

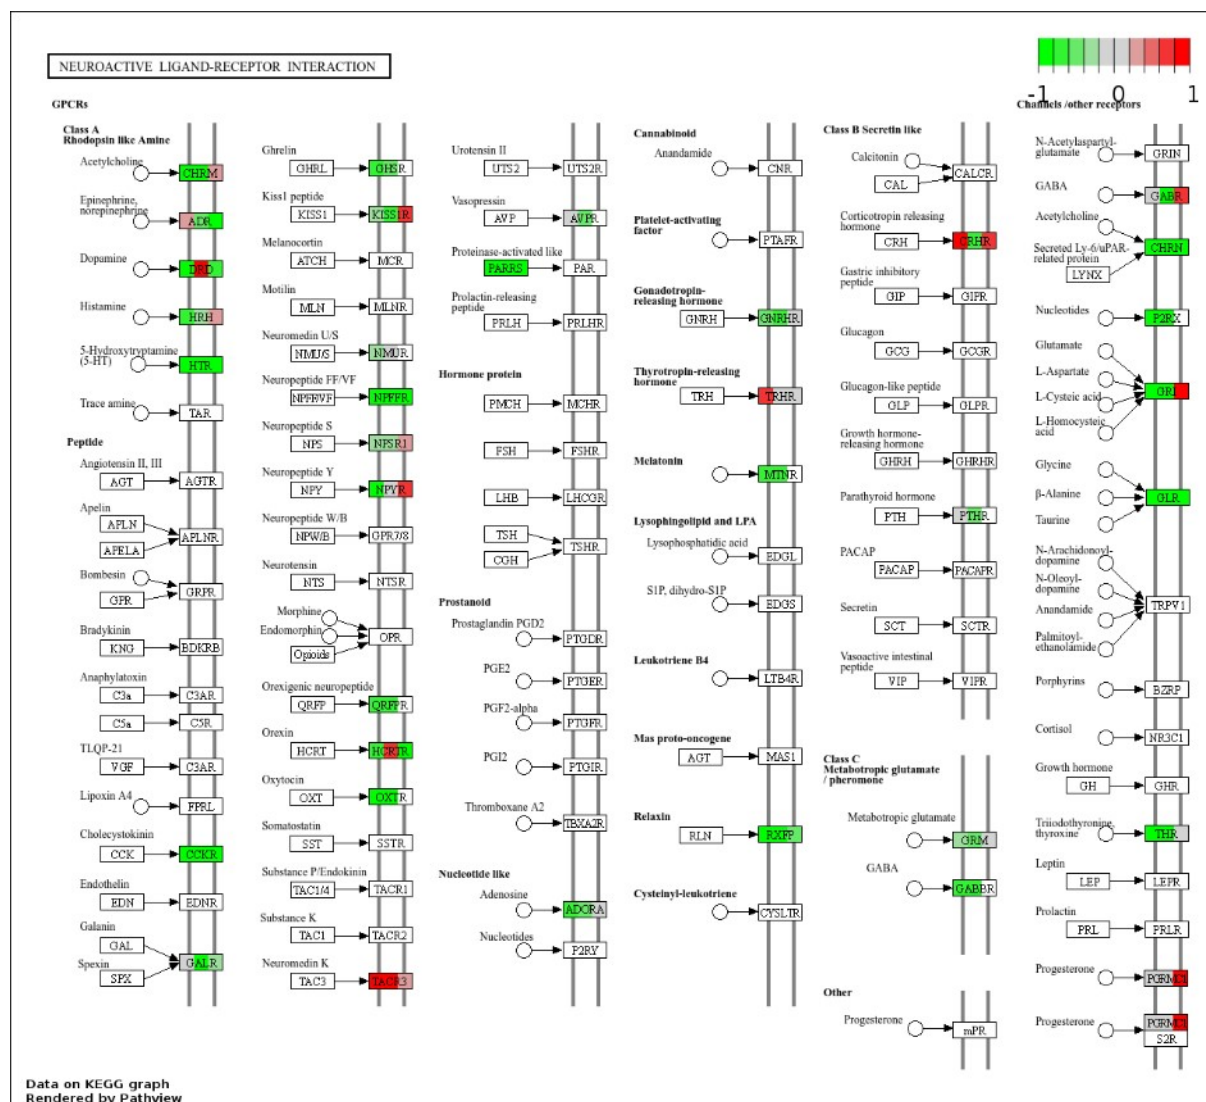

**Figure S4:** Fold-change (treatments versus control) of genes representing components of the “Neuroactive ligand-receptor interaction” KEGG pathway ko04080, as an example of pathways that are significantly affected in *Enchytraeus crypticus* exposed to WELGRO® for 2 days. Green and red indicate down- and up-regulation, respectively. Details in this pathway can be retrieved from the following website: <https://www.genome.jp/pathway/ko04080> (for interpretation of the references to colour in this figure legend, the reader is referred to the web version of this article).

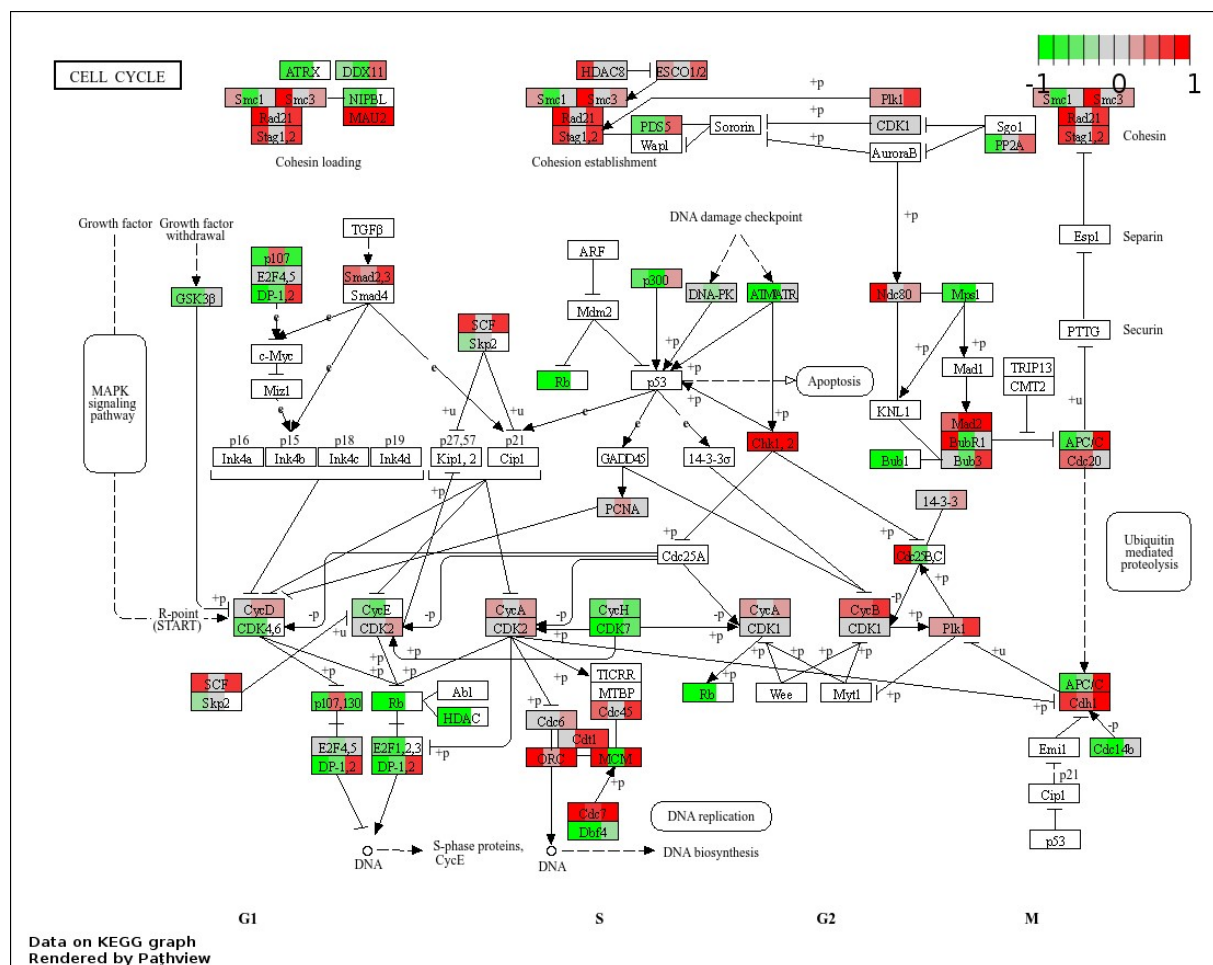

**Figure S5:** Fold-change (treatments versus control) of genes representing components of the “Cell cycle” KEGG pathway ko04110, as an example of pathways that are significantly affected in *Enchytraeus crypticus* exposed to WELGRO® for 2 days. Green and red indicate down- and up-regulation, respectively. Details in this pathway can be retrieved from the following website: <https://www.genome.jp/pathway/ko04110> (for interpretation of the references to colour in this figure legend, the reader is referred to the web version of this article).

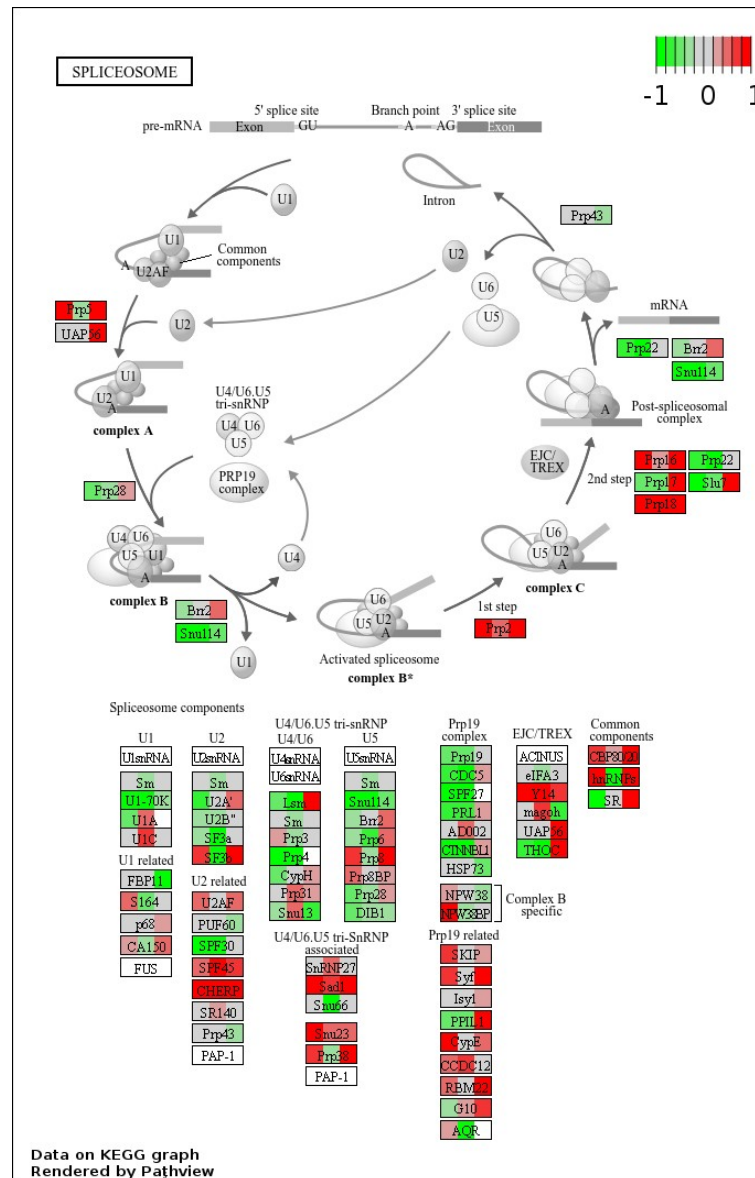

**Figure S6:** Fold-change (treatments versus control) of genes representing components of the “Spliceosome” KEGG pathway ko03040, as an example of pathways that are significantly affected in *Enchytraeus crypticus* exposed to WELGRO® for 2 days. Green and red indicate down- and up-regulation, respectively. Details in this pathway can be retrieved from the following website: <https://www.genome.jp/pathway/ko03040> (for interpretation of the references to colour in this figure legend, the reader is referred to the web version of this article).



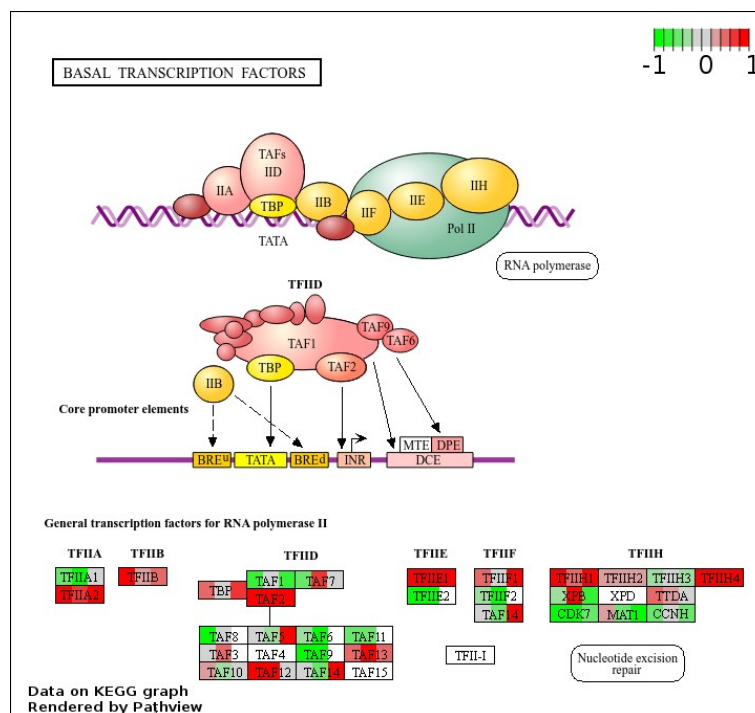

**Figure S7:** Fold-change (treatments versus control) of genes representing components of the “Basal transcription factors” KEGG pathway ko03022, as an example of pathways that are significantly affected in *Enchytraeus crypticus* exposed to WELGRO® for 2 days. Green and red indicate down- and up-regulation, respectively. Details in this pathway can be retrieved from the following website: <https://www.genome.jp/pathway/ko03022> (for interpretation of the references to colour in this figure legend, the reader is referred to the web version of this article).



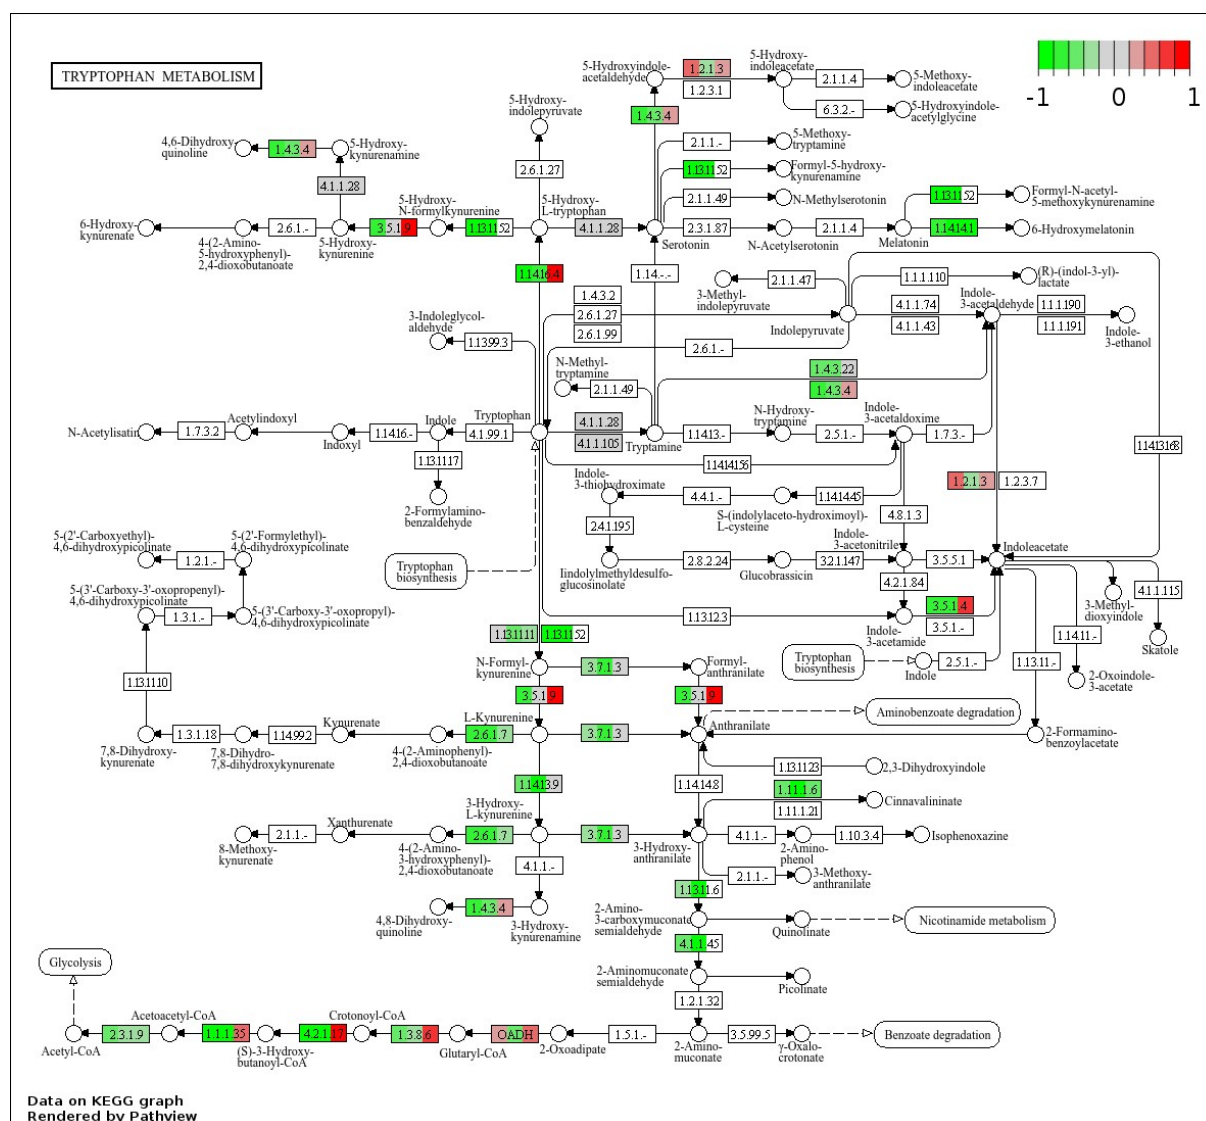

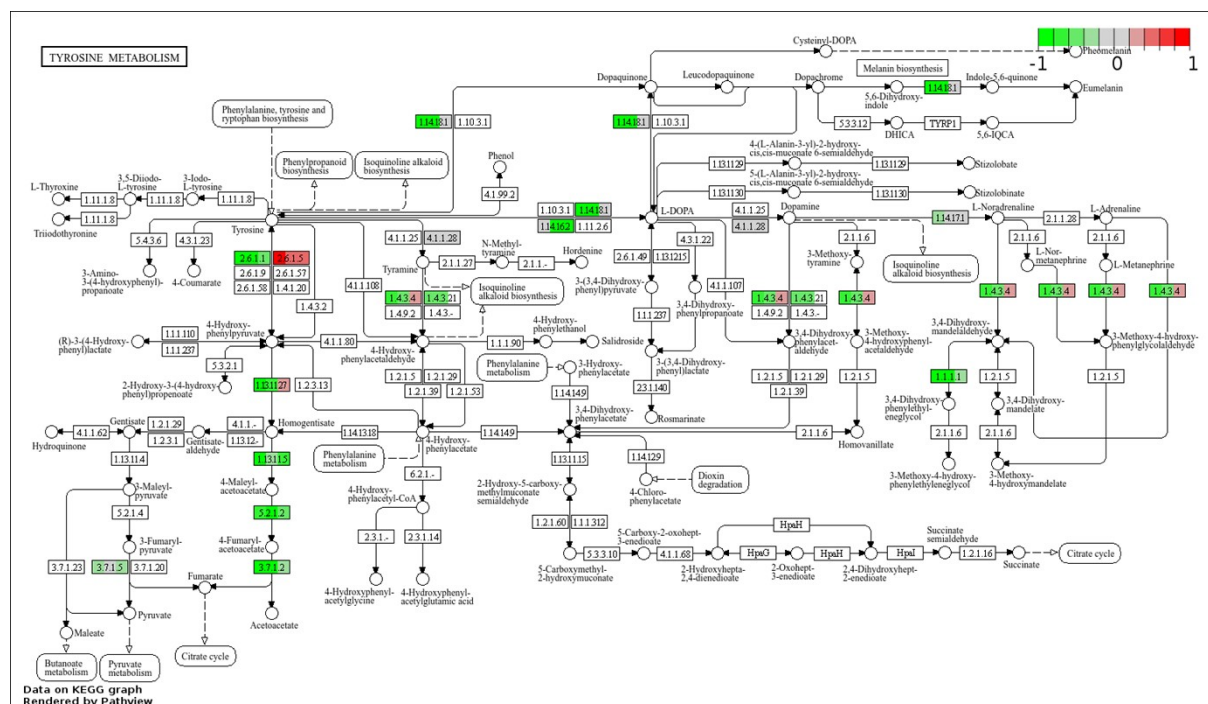

**Figure S9:** Fold-change (treatments versus control) of genes representing components of the "Tyrosine metabolism" KEGG pathway ko00350, as an example of pathways that are significantly affected in *Enchytraeus crypticus* exposed to WELGRO® for 2 days. Green and red indicate down- and up-regulation, respectively. Details in this pathway can be retrieved from the following website: <https://www.genome.jp/pathway/ko00350> (for interpretation of the references to colour in this figure legend, the reader is referred to the web version of this article).



21 days:

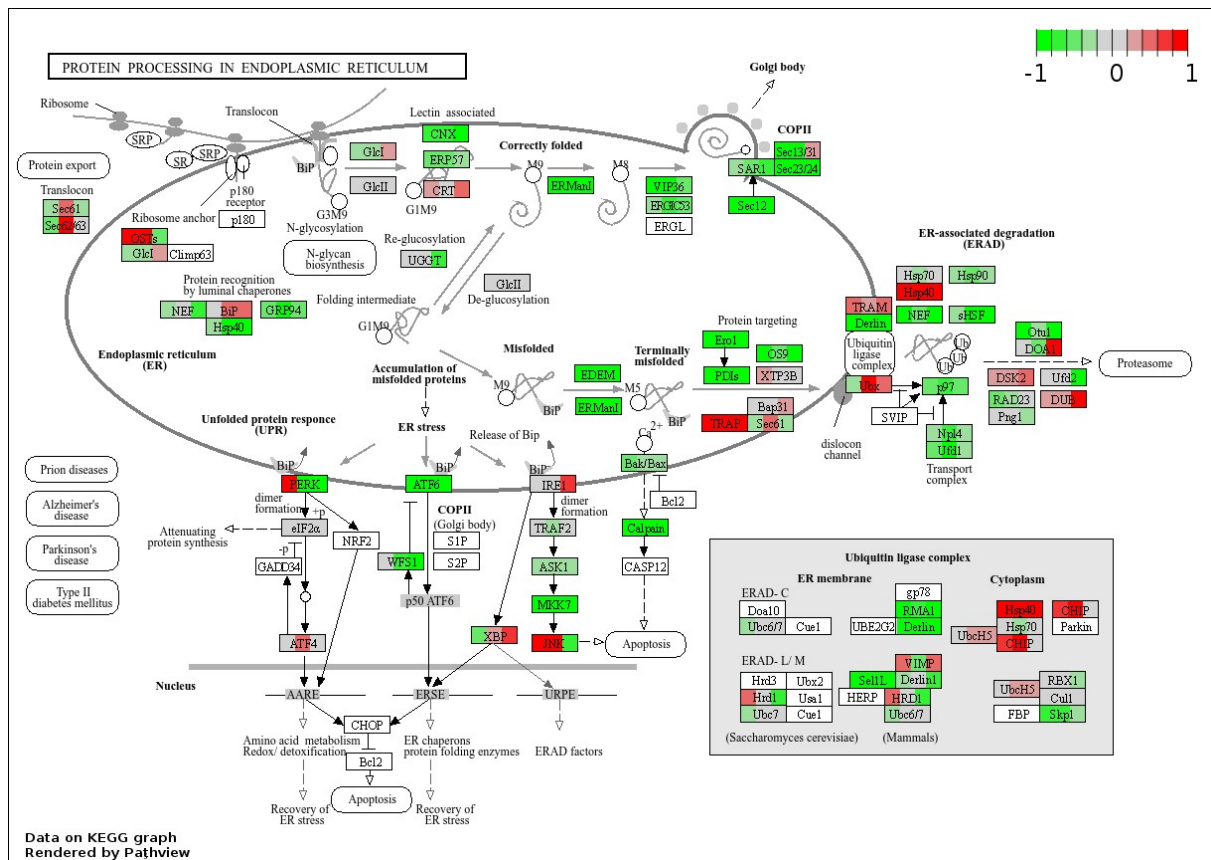

**Figure S11:** Fold-change (treatments versus control) of genes representing components of the “Protein processing in endoplasmic reticulum” KEGG pathway ko04141, as an example of pathways that are significantly affected in *Enchytraeus crypticus* exposed to WELGRO® for 21 days. Green and red indicate down- and up-regulation, respectively. Details in this pathway can be retrieved from the following website: <https://www.genome.jp/pathway/ko04141> (for interpretation of the references to colour in this figure legend, the reader is referred to the web version of this article).

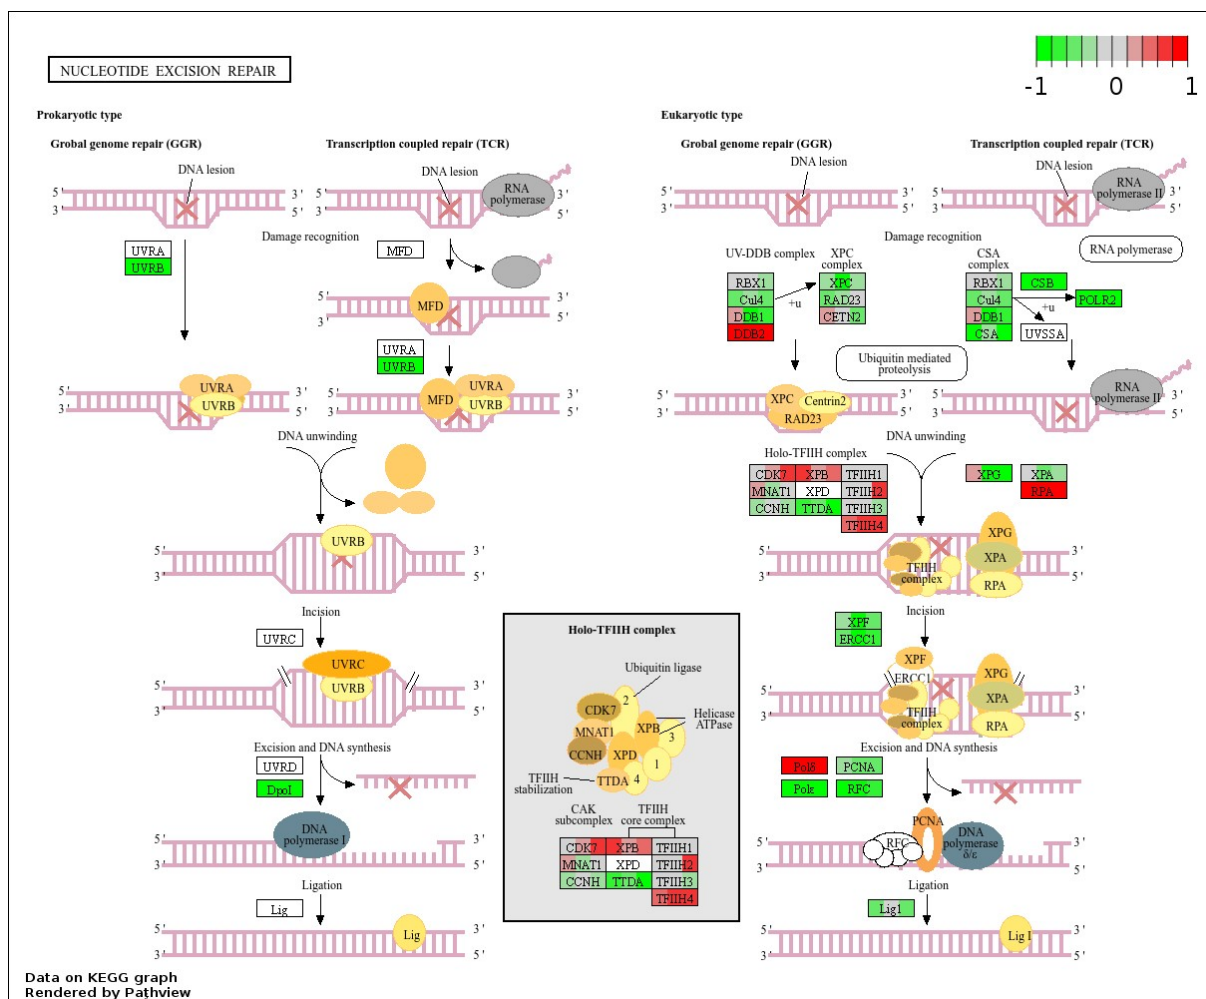

**Figure S12:** Fold-change (treatments versus control) of genes representing components of the “Nucleotide excision repair” KEGG pathway ko03420, as an example of pathways that are significantly affected in *Enchytraeus crypticus* exposed to WELGRO® for 21 days. Green and red indicate down- and up-regulation, respectively. Details in this pathway can be retrieved from the following website: <https://www.genome.jp/pathway/ko03420> (for interpretation of the references to colour in this figure legend, the reader is referred to the web version of this article).



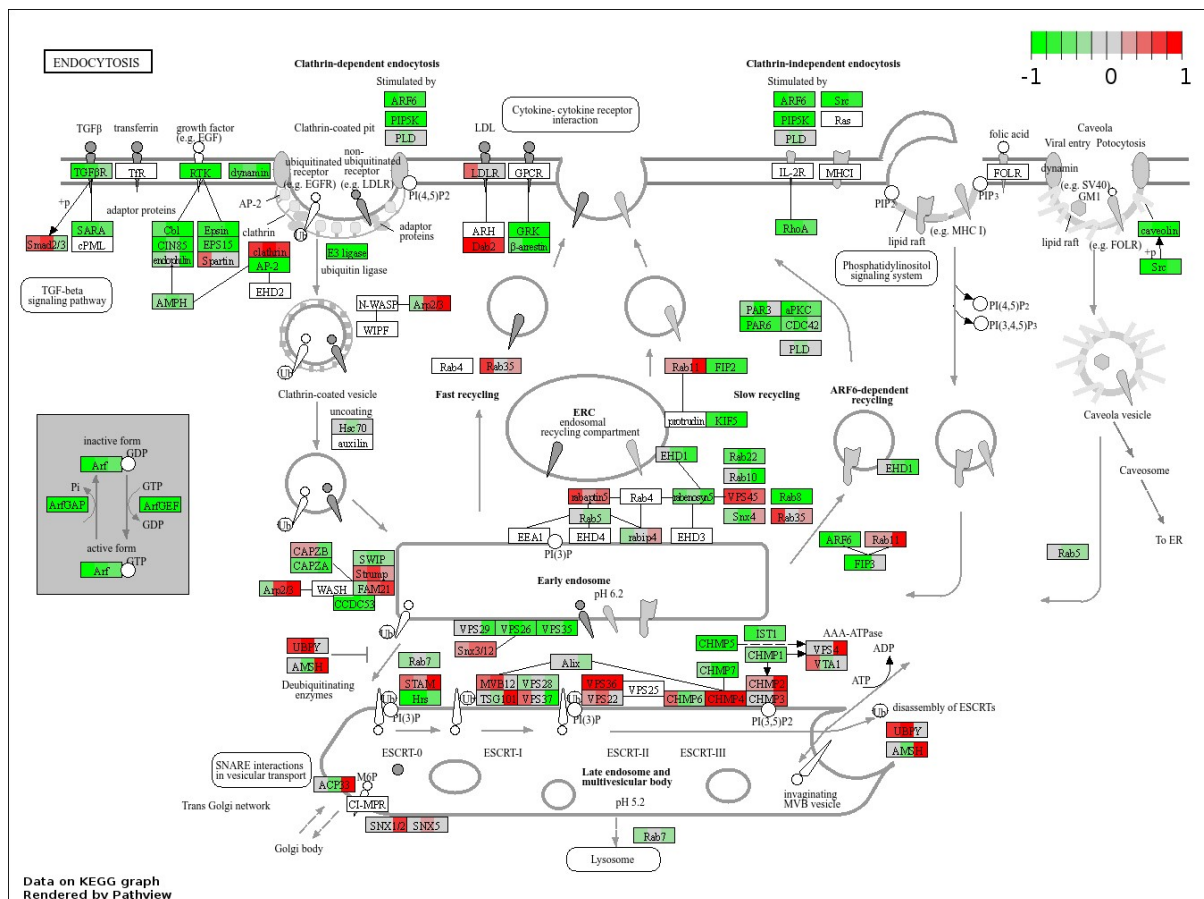

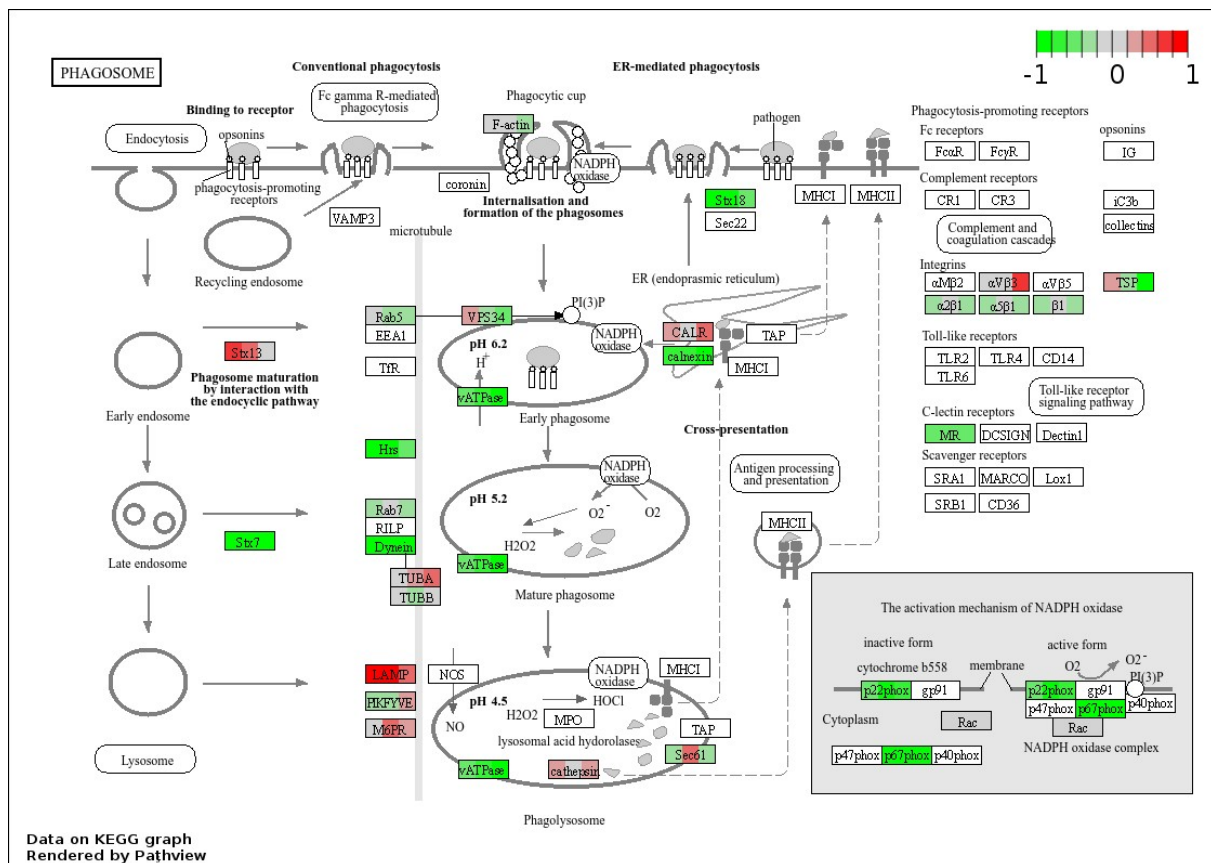

**Figure S14:** Fold-change (treatments versus control) of genes representing components of the “Phagosome” KEGG pathway ko04145, as an example of pathways that are significantly affected in *Enchytraeus crypticus* exposed to WELGRO® for 21 days. Green and red indicate down- and up-regulation, respectively. Details in this pathway can be retrieved from the following website: <https://www.genome.jp/pathway/ko04145> (for interpretation of the references to colour in this figure legend, the reader is referred to the web version of this article).
