# Supplementary material for: Commercial nano-enabled fertilizer: unveiling its mechanisms of toxicity in non-target soil invertebrate species using a high-throughput transcriptomics approach
Source: Royal Society of Chemistry journal article supplement (doi:10.1039/d5en00314h), 2025-01-01
Supplement: d5en00314h2.xlsx [file d5en00314h2.xlsx]

## Sheet: Table S1
Table S1. List of all the differentially expressed genes in at least one condition (BH adjusted, p < 0.05) with the M value (log2 fold change) and adjusted p value for each treatment, and the Gene description based on GO annotation for each gene, in Enchytraeus crypticus exposed to 100, 500 and 1000 mg WELGRO/kg soil for 2 and 21 days. d: days. Grey cells = ajdjusted p < 0.05
		WELGRO_100_2d		WELGRO_500_2d		WELGRO_1000_2d		WELGRO_100_21d		WELGRO_500_21d		WELGRO_1000_21d
Sequence ID	Description/Annotation	M value	Adj p-value	M value	Adj p-value	M value	Adj p-value	M value	Adj p-value	M value	Adj p-value	M value	Adj p-value
contig00032	---NA---	2.1245	0.02226	1.331	0.13816	1.4983	0.33946	0.32755	0.80189	0.32794	0.71493	0.84214	0.23232
contig00066	---NA---	1.9863	0.02226	0.53228	0.52104	1.1304	0.48143	-0.0173	0.99362	-0.45317	0.53856	-0.0037208	0.99622
contig00073	---NA---	2.6424	0.044662	1.4362	0.27976	1.9052	0.47199	0.49437	0.80723	-0.33052	0.83008	0.8725	0.41192
contig00229	---NA---	2.7471	0.033134	1.3111	0.29784	1.1761	0.78971	0.60637	0.72386	0.39112	0.77667	0.2968	0.78605
contig00249	---NA---	7.193	0.019749	-1.1943	0.55599	-0.082043	0.99999	-0.9213	0.62926	-1.2861	0.32875	-0.25679	0.84856
contig00349	FAF2_XENTRRecName: Full=FAS-associated factor 2; AltName: Full=UBX domain-containing protein 8	1.5488	0.043774	0.38525	0.62957	0.97932	0.55836	-0.35243	0.74261	-0.15642	0.86898	0.11462	0.86825
contig00356	---NA---	0.035509	0.98582	0.12735	0.93107	-0.027188	0.99999	1.0272	0.51622	2.6307	0.12951	3.0909	0.029982
contig00409	---NA---	1.7362	0.02226	0.8671	0.21301	1.2956	0.27933	-0.15524	0.90721	-0.04623	0.9623	0.2272	0.69137
contig00614	---NA---	2.1038	0.02226	1.4525	0.10687	1.1302	0.53007	0.44763	0.68997	0.26839	0.77197	1.044	0.15818
contig00985	AB22G_ARATHRecName: Full=ABC transporter G family member 22; Short=ABC transporter ABCG.22; Short=AtABCG22; AltName: Full=White-brown complex homolog protein 23; Short=AtWBC23	1.6046	0.10362	1.9826	0.084202	3.3955	0.025501	-0.086805	0.9728	-0.13267	0.92226	0.65935	0.41928
contig01084	NFRKB_MOUSERecName: Full=Nuclear factor related to kappa-B-binding protein; AltName: Full=DNA-binding protein R kappa-B	2.4105	0.039745	1.0843	0.35529	1.0925	0.78508	-0.24543	0.91625	-0.21662	0.88224	-0.57815	0.53666
contig01096	---NA---	1.9194	0.028794	1.0699	0.21442	1.1116	0.54077	0.31888	0.80472	0.076821	0.94878	0.53747	0.42826
contig01430	---NA---	3.0348	0.020432	1.1164	0.33478	1.8261	0.40472	-0.0021311	0.99933	-0.072498	0.96457	0.47776	0.61195
contig01544	---NA---	1.8842	0.040595	0.3899	0.68051	0.79909	0.83606	-0.099871	0.96509	-0.42991	0.63107	-0.067422	0.93723
contig01787	---NA---	2.6051	0.033496	0.71141	0.5726	1.5284	0.55836	-0.0056609	0.99869	-0.46414	0.70899	0.54418	0.57779
contig01789	---NA---	0.64286	0.31128	0.8695	0.17643	0.089118	0.99999	0.66269	0.41756	0.68683	0.20128	1.3319	0.04956
contig01816	METH_HUMANRecName: Full=Methionine synthase; AltName: Full=5-methyltetrahydrofolate--homocysteine methyltransferase; AltName: Full=Vitamin-B12 dependent methionine synthase; Short=MS	2.269	0.038275	0.99527	0.36282	1.5663	0.46504	0.20632	0.92481	0.24944	0.8469	0.019077	0.98471
contig01848	RTXE_DROMERecName: Full=Probable RNA-directed DNA polymerase from transposon X-element; AltName: Full=Reverse transcriptase	0.27773	0.77196	1.0595	0.17479	-0.32464	0.99999	1.1749	0.38339	1.4357	0.12951	1.8864	0.025643
contig01878	RADI_HUMANRecName: Full=Radixin	2.2144	0.028794	0.78563	0.42765	0.82844	0.85657	-0.30628	0.85172	0.15153	0.90561	-0.050072	0.95658
contig02212	---NA---	1.5225	0.038275	0.50011	0.50736	1.2022	0.37913	-0.33977	0.73677	-0.5736	0.35979	-0.22579	0.71361
contig02337	---NA---	-0.056408	0.97218	1.2454	0.22919	-0.6226	0.99999	1.4992	0.38339	1.5817	0.12951	2.3192	0.038199
contig02389	---NA---	0.91315	0.43097	0.34459	0.75866	-0.32159	0.99999	0.45398	0.77297	2.1778	0.12951	2.4355	0.040421
contig02513	---NA---	1.4042	0.057588	0.8691	0.25626	0.69328	0.80187	0.42531	0.66324	0.98252	0.15853	1.6852	0.041591
contig02538	NF60_DORPERecName: Full=60 kDa neurofilament protein; Short=NF60	2.0788	0.02226	1.1081	0.19338	1.7718	0.19179	0.083216	0.968	0.33268	0.69691	0.27379	0.69465
contig02579	ANTA_HYDVURecName: Full=Antistasin; Short=ATS; AltName: Full=Blood coagulation factor Xa/proclotting enzyme inhibitor; Flags: Precursor	-0.17014	0.89819	0.53518	0.59564	-0.062617	0.99999	1.3364	0.38339	2.2567	0.12173	2.3284	0.029245
contig02586	---NA---	3.4148	0.033462	1.4143	0.37353	2.2879	0.46447	-0.37352	0.90153	-0.27634	0.89094	-0.32547	0.81321
contig03088	SMC2_XENLARecName: Full=Structural maintenance of chromosomes protein 2; Short=SMC protein 2; Short=SMC-2; AltName: Full=Chromosome assembly protein XCAP-E; AltName: Full=Chromosome-associated protein E	3.3646	0.028478	1.5898	0.28416	2.227	0.45523	0.12238	0.97372	-0.19966	0.91976	0.0094573	0.9945
contig03185	CRNS1_HUMANRecName: Full=Carnosine synthase 1; AltName: Full=ATP-grasp domain-containing protein 1	2.3051	0.054359	3.0219	0.039963	0.93137	0.84017	0.93554	0.5219	1.6732	0.14264	0.38007	0.70714
contig03220	---NA---	1.993	0.016285	1.2687	0.094268	1.4965	0.18275	0.16608	0.89852	-0.14226	0.86616	0.10738	0.86075
contig03421	---NA---	2.4016	0.041092	0.75358	0.53925	1.5168	0.55043	0.01348	0.99603	-0.41887	0.73635	-0.069549	0.94954
contig03455	TBA_LYTPIRecName: Full=Tubulin alpha chain	1.4271	0.026924	0.96234	0.13202	1.0707	0.33946	0.3839	0.60993	0.43438	0.41618	0.98503	0.093738
contig03470	COCA1_HUMANRecName: Full=Collagen alpha-1(XII) chain; Flags: Precursor	2.4934	0.02661	0.69004	0.53472	0.47265	0.99999	-0.47254	0.75417	1.088	0.22902	1.0523	0.2283
contig03479	GLNA_RATRecName: Full=Glutamine synthetase; Short=GS; AltName: Full=Glutamate--ammonia ligase; AltName: Full=Palmitoyltransferase GLUL	0.22584	0.84528	0.80343	0.37374	0.060091	0.99999	0.35208	0.79172	1.4906	0.12951	2.6103	0.010856
contig03694	MCF2L_HUMANRecName: Full=Guanine nucleotide exchange factor DBS; AltName: Full=DBL's big sister; AltName: Full=MCF2-transforming sequence-like protein	3.1902	0.037603	1.8861	0.21985	1.5773	0.71417	0.62982	0.77552	0.66737	0.65684	0.45151	0.72581
contig03736	RN19A_HUMANRecName: Full=E3 ubiquitin-protein ligase RNF19A; AltName: Full=Double ring-finger protein; Short=Dorfin; AltName: Full=RING finger protein 19A; AltName: Full=p38	2.3	0.026924	0.65683	0.52304	1.1762	0.60969	-0.078862	0.97411	-0.060011	0.96603	-0.011672	0.99018
contig03764	---NA---	1.8189	0.047612	1.0402	0.26223	0.82764	0.81403	0.50552	0.67352	0.026834	0.98664	0.18257	0.82219
contig03812	---NA---	0.9795	0.32155	0.88445	0.36614	0.50394	0.99999	1.2091	0.38339	1.273	0.1558	2.3195	0.029982
contig04064	---NA---	0.93315	0.28357	0.86184	0.32128	0.71514	0.87858	0.87759	0.43556	2.1245	0.086389	4.2221	3.8356e-05
contig04092	---NA---	5.9511	0.016719	-0.95578	0.50627	-0.56525	0.99999	-0.085758	0.98254	-0.97538	0.48361	-1.106	0.3761
contig04113	---NA---	1.2439	0.52248	0.85825	0.62985	-0.13856	0.99999	0.055971	0.99032	3.9786	0.12576	4.7251	0.013774
contig04123	---NA---	2.017	0.02226	0.75974	0.3479	0.76525	0.77508	0.33887	0.7698	0.036985	0.97565	-0.17472	0.80172
contig04184	---NA---	-0.23219	0.88437	-1.435	0.23185	-3.8011	0.028903	1.2783	0.41201	-0.37555	0.77162	-3.0143	0.022172
contig04260	---NA---	2.3328	0.02226	0.48753	0.61384	1.1703	0.5657	-0.39494	0.76802	0.020954	0.98937	1.3074	0.1183
contig04285	ZSWM7_MOUSERecName: Full=Zinc finger SWIM domain-containing protein 7; AltName: Full=SWIM domain-containing and Srs2-interacting protein 1 homolog	0.76836	0.51666	-0.55301	0.58279	0.031302	0.99999	-2.0044	0.32204	-2.5531	0.027664	-2.3877	0.016528
contig04321	FRMD5_MOUSERecName: Full=FERM domain-containing protein 5	2.3236	0.03302	1.1234	0.29113	0.82934	0.9113	0.28556	0.88175	1.0884	0.22693	0.66454	0.43381
contig04400	---NA---	0.81512	0.32936	-0.048262	0.95967	0.0015947	0.99999	0.67457	0.50466	1.4501	0.12951	2.0156	0.026391
contig04462	ANK3_HUMANRecName: Full=Ankyrin-3; Short=ANK-3; AltName: Full=Ankyrin-G	2.8148	0.032004	0.037181	0.9806	1.3326	0.70635	-1.1363	0.51223	-1.9036	0.14958	-2.2432	0.097303
contig04605	---NA---	1.8296	0.049081	0.43412	0.65565	0.47805	0.99999	0.62293	0.58492	1.1034	0.18216	1.2414	0.13341
contig04928	---NA---	1.6586	0.036154	0.81449	0.29693	0.77737	0.74251	0.13188	0.93644	0.33921	0.66182	-0.36775	0.55959
contig05000	EF1A2_MUCCLRecName: Full=Elongation factor 1-alpha; Short=EF-1-alpha	2.0306	0.18223	1.4312	0.3634	2.6427	0.36085	0.37913	0.89772	1.1249	0.40854	3.6221	0.033099
contig05001	EF1A_ABSGLRecName: Full=Elongation factor 1-alpha; Short=EF-1-alpha	0.18631	0.94596	1.0723	0.51258	1.8315	0.64192	-0.32193	0.91969	-0.12771	0.95487	3.5047	0.043927
contig05148	---NA---	-3.5825	0.034923	-3.8551	0.039963	-3.0918	0.27996	-0.96526	0.41263	-1.3298	0.13423	-1.259	0.1553
contig05290	NADAP_HUMANRecName: Full=Kanadaptin; AltName: Full=Human lung cancer oncogene 3 protein; Short=HLC-3; AltName: Full=Kidney anion exchanger adapter protein; AltName: Full=Solute carrier family 4 anion exchanger member 1 adapter protein	2.0248	0.040372	0.9673	0.32588	1.734	0.33254	-0.14445	0.94705	0.2466	0.82839	-0.14089	0.87291
contig05330	---NA---	2.4091	0.040595	0.74435	0.54449	0.78963	0.99486	0.017644	0.99484	0.18834	0.90137	-1.196	0.21785
contig05459	IQCE_MOUSERecName: Full=IQ domain-containing protein E	2.3181	0.03051	0.55286	0.61091	0.68614	0.99999	0.37702	0.81592	0.022937	0.98969	0.063034	0.94821
contig05507	E78C_DROMERecName: Full=Ecdysone-induced protein 78C; Short=DR-78; AltName: Full=Nuclear receptor subfamily 1 group E member 1	-4.4042	0.023771	-4.4347	0.028111	-3.0201	0.33789	-0.86824	0.50245	-1.2297	0.1851	-1.1099	0.23863
contig05694	---NA---	2.4832	0.029494	1.211	0.27575	1.3829	0.57067	-0.1205	0.96509	-0.19765	0.88833	0.034884	0.9731
contig05899	---NA---	1.8418	0.043774	0.65949	0.48372	0.8513	0.79167	0.04048	0.98706	-0.14674	0.90144	0.6002	0.41452
contig06250	---NA---	1.6557	0.027892	0.56502	0.43841	0.75894	0.6994	-0.1008	0.95008	-0.032378	0.97644	0.30907	0.59791
contig06252	---NA---	1.6628	0.029459	0.58191	0.43791	0.75656	0.72198	0.062525	0.9728	0.1464	0.8728	0.51478	0.38684
contig06277	---NA---	2.6798	0.029459	1.0496	0.38243	1.2917	0.68376	0.18059	0.94562	0.33641	0.80286	0.1385	0.89733
contig06349	---NA---	1.784	0.02226	1.1413	0.12222	1.0695	0.44228	0.059564	0.9728	0.08753	0.92524	0.87647	0.15152
contig06403	---NA---	1.6828	0.12382	1.7878	0.13186	0.45476	0.99999	0.75305	0.58467	2.04	0.12951	3.2927	0.011148
contig06749	---NA---	1.215	0.19797	2.4125	0.053854	-0.014952	0.99999	-0.25996	0.89735	1.0958	0.22897	2.5671	0.031665
contig06913	KPCG_RATRecName: Full=Protein kinase C gamma type; Short=PKC-gamma	2.4095	0.022067	1.0477	0.25987	0.84299	0.80185	0.45241	0.71823	0.5097	0.55278	0.80538	0.2823
contig07013	---NA---	1.6892	0.038275	0.79323	0.32675	0.49949	0.99999	0.18926	0.90318	-0.022997	0.98687	0.29864	0.65535
contig07254	---NA---	3.7205	0.044059	2.2259	0.23397	1.3725	0.93897	0.17287	0.97289	1.904	0.27632	0.57465	0.74493
contig07317	TOPRS_DROMERecName: Full=E3 ubiquitin-protein ligase Topors; AltName: Full=RING-type E3 ubiquitin transferase Topors; AltName: Full=SUMO1-protein E3 ligase Topors; AltName: Full=Topoisomerase I-binding RING finger protein; AltName: Full=Topoisomerase I-binding arginine/serine-rich protein; AltName: Full=dTopors	3.3352	0.042137	2.1223	0.20603	3.4176	0.22178	-0.079572	0.9855	-0.70092	0.67096	0.11611	0.93943
contig07318	---NA---	2.9755	0.033926	1.4825	0.28288	2.5123	0.29407	0.23794	0.93434	-0.10465	0.95755	0.43728	0.70637
contig07355	---NA---	1.831	0.040181	0.31641	0.7284	0.27497	0.99999	-0.37061	0.77297	-0.23007	0.82142	0.47631	0.50257
contig07629	---NA---	2.3427	0.044662	1.37	0.24801	0.73931	0.99999	0.13698	0.96117	0.31738	0.81199	-0.22847	0.82523
contig07651	SPTB2_MOUSERecName: Full=Spectrin beta chain, non-erythrocytic 1; AltName: Full=Beta-II spectrin; AltName: Full=Embryonic liver fodrin; AltName: Full=Fodrin beta chain	2.7379	0.025942	1.1509	0.32394	2.2568	0.2598	-0.051477	0.98705	-0.45117	0.70631	-0.26923	0.7894
contig07663	---NA---	2.5037	0.029834	1.8623	0.11453	1.1614	0.71601	0.65993	0.63973	0.47315	0.67576	-0.0090495	0.99319
contig07766	RL30_SPOFRRecName: Full=60S ribosomal protein L30	1.6766	0.02226	1.3582	0.076859	0.80784	0.61255	-0.086944	0.95712	0.33298	0.61224	0.30785	0.57885
contig07865	SPTB2_MOUSERecName: Full=Spectrin beta chain, non-erythrocytic 1; AltName: Full=Beta-II spectrin; AltName: Full=Embryonic liver fodrin; AltName: Full=Fodrin beta chain	2.6417	0.025942	1.388	0.2205	1.1699	0.7112	0.58597	0.69227	0.56688	0.59705	-0.3793	0.68524
contig07909	UNC89_CAEELRecName: Full=Muscle M-line assembly protein unc-89; AltName: Full=Obscurin; AltName: Full=Uncoordinated protein 89	2.8815	0.027973	0.75387	0.56827	1.3139	0.7126	0.22761	0.93064	0.078721	0.96489	-0.33395	0.75883
contig07933	---NA---	2.7309	0.042561	2.4392	0.096078	1.8904	0.48604	-0.091692	0.97537	0.082224	0.96155	-0.44654	0.65325
contig07995	GRP75_PONABRecName: Full=Stress-70 protein, mitochondrial; AltName: Full=75 kDa glucose-regulated protein; Short=GRP-75; AltName: Full=Heat shock 70 kDa protein 9; Flags: Precursor	-0.079239	0.94393	0.25908	0.72815	-0.25429	0.99999	0.28224	0.79367	0.93404	0.15897	1.718	0.029982
contig08070	---NA---	2.6948	0.033134	0.72673	0.57406	1.2791	0.71594	-0.074844	0.98041	-0.40818	0.75846	0.32091	0.76337
contig08291	---NA---	2.1652	0.038275	1.0701	0.30327	0.99388	0.77178	0.32226	0.85376	0.33784	0.76202	0.67269	0.41873
contig08393	---NA---	2.2816	0.043629	1.0373	0.36427	1.1447	0.73172	0.64965	0.65241	0.65224	0.53182	-0.16336	0.87286
contig08464	SYNC_BOVINRecName: Full=Asparagine--tRNA ligase, cytoplasmic; AltName: Full=Asparaginyl-tRNA synthetase; Short=AsnRS	-0.074471	0.94789	-0.12439	0.87601	-0.058227	0.99999	0.078402	0.96536	0.965	0.15245	1.6939	0.032358
contig08498	C124A_XENLARecName: Full=Coiled-coil domain-containing protein 124-A	0.46564	0.44409	0.10479	0.86393	0.14123	0.99999	0.08691	0.94474	0.40401	0.41173	1.2306	0.044726
contig08569	---NA---	2.1398	0.043295	1.8077	0.10743	2.0169	0.27933	0.4104	0.79678	0.23178	0.85705	0.028071	0.97717
contig08586	ARSE_HUMANRecName: Full=Arylsulfatase E; Short=ASE; Flags: Precursor	0.10502	0.96704	-0.11866	0.9454	-0.44894	0.99999	1.4804	0.45805	2.3868	0.12951	3.8168	0.024556
contig08593	SMU1_CHICKRecName: Full=WD40 repeat-containing protein SMU1; AltName: Full=Smu-1 suppressor of mec-8 and unc-52 protein homolog	4.7282	0.028255	-0.82733	0.56884	0.44677	0.99999	-1.3141	0.47301	-1.525	0.24851	-1.4059	0.2217
contig08666	---NA---	2.0523	0.02226	1.2868	0.13463	0.98354	0.60893	0.058188	0.97761	-0.095086	0.93119	0.82275	0.22441
contig08731	VIT1_CAEELRecName: Full=Vitellogenin-1; Flags: Precursor	3.3797	0.042547	1.287	0.44881	1.1438	0.98452	-1.0814	0.5945	0.15946	0.94557	-1.2326	0.36098
contig08820	---NA---	2.7506	0.040595	2.9889	0.053854	0.87372	0.99999	0.69266	0.69714	1.938	0.13375	-1.007	0.35269
contig08856	STA5B_BOVINRecName: Full=Signal transducer and activator of transcription 5B	1.9164	0.049081	0.56768	0.58144	0.52614	0.99999	0.45529	0.73826	0.3655	0.72195	0.18184	0.83343
contig08886	SYVNA_XENLARecName: Full=E3 ubiquitin-protein ligase synoviolin A; AltName: Full=RING-type E3 ubiquitin transferase synoviolin A; AltName: Full=Synovial apoptosis inhibitor-1-A; Flags: Precursor	-0.67285	0.67996	-0.15993	0.87621	0.73636	0.91014	-1.3537	0.38339	-1.4176	0.13182	-2.0918	0.044438
contig08950	PPR3B_DANRERecName: Full=Protein phosphatase 1 regulatory subunit 3B	1.736	0.040595	0.36075	0.67969	0.56828	0.9947	0.0059172	0.9983	-0.16872	0.872	-0.01983	0.97999
contig09035	---NA---	6.4238	0.0068663	0.47231	0.72082	-1.0063	0.9113	0.083209	0.97923	0.60552	0.62745	0.92497	0.37142
contig09055	---NA---	0.29254	0.7954	-0.56628	0.5477	0.51604	0.99999	-2.5968	0.14952	-2.939	0.02599	-2.8249	0.013774
contig09091	---NA---	0.94063	0.19681	0.54745	0.47257	0.12748	0.99999	0.56169	0.53081	1.1614	0.12951	2.1474	0.011148
contig09247	---NA---	1.8782	0.02226	1.4707	0.078613	1.7069	0.15668	-0.12561	0.9366	-0.21699	0.79506	-0.76493	0.21436
contig09338	---NA---	0.89883	0.42169	0.45532	0.67402	0.0038517	0.99999	0.1849	0.93282	1.9248	0.12951	2.6216	0.024773
contig09355	---NA---	3.4645	0.044561	-1.0297	0.40601	0.64974	0.99999	-0.58096	0.68459	-0.84661	0.36962	0.13152	0.90463
contig09461	RUVB2_XENLARecName: Full=RuvB-like 2; AltName: Full=Reptin	-0.61044	0.71542	-0.70499	0.49192	0.47515	0.99999	-2.9169	0.085583	-3.2827	0.021626	-2.7425	0.021087
contig09470	---NA---	0.38176	0.7449	0.74725	0.42838	-0.029612	0.99999	0.5847	0.60962	0.91272	0.24631	2.1294	0.036141
contig09661	SYFAB_XENLARecName: Full=Phenylalanine--tRNA ligase alpha subunit B; AltName: Full=Phenylalanyl-tRNA synthetase alpha subunit B; Short=PheRS	0.415	0.67274	1.3564	0.10907	-0.11593	0.99999	1.0349	0.38339	1.8206	0.12576	2.1975	0.013774
contig09709	TPR_MOUSERecName: Full=Nucleoprotein TPR; AltName: Full=NPC-associated intranuclear protein; AltName: Full=Translocated promoter region and nuclear basket protein	3.0686	0.040595	1.6068	0.28416	1.4399	0.7692	0.31152	0.9178	-0.080295	0.9704	-0.81519	0.49734
contig09777	TF2H4_HUMANRecName: Full=General transcription factor IIH subunit 4; AltName: Full=Basic transcription factor 2 52 kDa subunit; Short=BTF2 p52; AltName: Full=General transcription factor IIH polypeptide 4; AltName: Full=TFIIH basal transcription factor complex p52 subunit	3.1786	0.033953	1.4896	0.31348	1.1227	0.92289	0.41491	0.87294	0.67803	0.63796	0.78807	0.5047
contig09839	SNX2_MOUSERecName: Full=Sorting nexin-2	2.107	0.023579	1.2351	0.16921	1.0286	0.61593	0.28612	0.84141	0.35486	0.6899	1.4041	0.093738
contig09894	RM37_HUMANRecName: Full=39S ribosomal protein L37, mitochondrial; Short=L37mt; Short=MRP-L37; AltName: Full=39S ribosomal protein L2, mitochondrial; Short=L2mt; Short=MRP-L2; AltName: Full=Mitochondrial large ribosomal subunit protein mL37; Flags: Precursor	-0.093624	0.92794	0.16028	0.82622	-0.55573	0.89871	0.50612	0.54087	0.44393	0.47033	1.4753	0.048467
contig09912	---NA---	2.547	0.040595	0.90081	0.47931	1.4099	0.65078	-0.21334	0.9347	-0.42535	0.74873	0.074902	0.94821
contig10007	---NA---	3.3074	0.039573	2.8079	0.10086	1.3642	0.84753	1.3615	0.49658	1.7391	0.2021	-1.2316	0.33861
contig10060	DCDC1_HUMANRecName: Full=Doublecortin domain-containing protein 1; AltName: Full=Doublecortin domain-containing 5 protein	2.1714	0.034767	0.89082	0.38275	0.39174	0.99999	0.19814	0.92272	0.047182	0.97521	-0.39286	0.63838
contig10069	RNF14_MOUSERecName: Full=E3 ubiquitin-protein ligase RNF14; AltName: Full=Androgen receptor-associated protein 54; AltName: Full=Protein Triad2; AltName: Full=RING finger protein 14	-3.8203	0.017392	-3.9923	0.028111	-3.3009	0.18275	0.011556	0.99551	0.52287	0.53917	0.9399	0.22115
contig10282	---NA---	2.9412	0.016285	0.91259	0.3643	1.3263	0.53007	-0.32449	0.84295	-0.32919	0.75975	-0.40716	0.61955
contig10402	PCMD2_HUMANRecName: Full=Protein-L-isoaspartate O-methyltransferase domain-containing protein 2	3.0887	0.027973	0.54109	0.69829	1.9135	0.48143	-1.1062	0.50471	-0.64923	0.61782	-0.72301	0.50387
contig10533	---NA---	3.0902	0.038275	1.0533	0.4886	1.7036	0.64591	-0.097353	0.97884	-0.12466	0.95325	0.19398	0.88449
contig10688	LRRC9_XENTRRecName: Full=Leucine-rich repeat-containing protein 9	2.2731	0.04108	0.73122	0.52729	1.0179	0.80142	0.40734	0.81324	-0.090695	0.95445	-0.84729	0.34677
contig10710	---NA---	0.11917	0.90068	0.58117	0.40288	-0.22425	0.99999	0.68505	0.44556	0.90821	0.1539	1.5351	0.040992
contig10727	---NA---	2.1547	0.03712	0.84512	0.41232	0.87892	0.842	-0.018994	0.99427	0.024562	0.9886	0.19534	0.82792
contig10788	KCMB4_HUMANRecName: Full=Calcium-activated potassium channel subunit beta-4; AltName: Full=BK channel subunit beta-4; Short=BKbeta4; Short=Hbeta4; AltName: Full=Calcium-activated potassium channel, subfamily M subunit beta-4; AltName: Full=Charybdotoxin receptor subunit beta-4; AltName: Full=K(VCA)beta-4; AltName: Full=Maxi K channel subunit beta-4; AltName: Full=Slo-beta-4	2.4721	0.029459	1.0873	0.32449	1.0284	0.78779	0.28537	0.88769	0.50961	0.63451	0.78824	0.37207
contig10829	MA2B1_MACFARecName: Full=Lysosomal alpha-mannosidase; Short=Laman; AltName: Full=Lysosomal acid alpha-mannosidase; AltName: Full=Mannosidase alpha class 2B member 1; AltName: Full=Mannosidase alpha-B; Flags: Precursor	1.3781	0.30727	-0.080875	0.95786	0.65002	0.99999	-2.8029	0.38339	-3.0971	0.12576	-4.96	0.0015408
contig10928	RNPC3_BOVINRecName: Full=RNA-binding region-containing protein 3; AltName: Full=RNA-binding motif protein 40; Short=RNA-binding protein 40	-4.2129	0.049081	-4.6961	0.053433	-3.6759	0.33956	-1.6435	0.38339	-1.8867	0.13903	-1.9626	0.12959
contig10973	PPIP1_HUMANRecName: Full=Proline-serine-threonine phosphatase-interacting protein 1; Short=PEST phosphatase-interacting protein 1; AltName: Full=CD2-binding protein 1; AltName: Full=H-PIP	4.2476	0.0079175	0.14343	0.8863	-0.14519	0.99999	1.1176	0.38339	1.8487	0.12929	1.4599	0.082318
contig10975	---NA---	0.50737	0.51238	-0.2631	0.71214	-0.019216	0.99999	-0.24176	0.82463	0.59922	0.30523	1.4845	0.047357
contig11054	ESYT2_MOUSERecName: Full=Extended synaptotagmin-2; Short=E-Syt2	2.2325	0.028255	0.87011	0.37957	1.1431	0.62532	0.29419	0.86125	0.27812	0.80211	0.69465	0.37862
contig11160	HUWE1_HUMANRecName: Full=E3 ubiquitin-protein ligase HUWE1; AltName: Full=ARF-binding protein 1; Short=ARF-BP1; AltName: Full=HECT, UBA and WWE domain-containing protein 1; AltName: Full=HECT-type E3 ubiquitin transferase HUWE1; AltName: Full=Homologous to E6AP carboxyl terminus homologous protein 9; Short=HectH9; AltName: Full=Large structure of UREB1; Short=LASU1; AltName: Full=Mcl-1 ubiquitin …	2.3933	0.049081	1.3658	0.2677	1.2942	0.70184	0.47067	0.7987	0.34156	0.80667	0.43533	0.66966
contig11313	RCC2_XENLARecName: Full=Protein RCC2 homolog	3.6878	0.034827	-1.0149	0.39789	-0.16983	0.99999	-0.75518	0.59917	-0.23513	0.87034	-0.085107	0.94308
contig11413	---NA---	1.2049	0.30669	1.9715	0.10907	-0.87058	0.9334	1.2356	0.41654	1.7063	0.13275	2.5128	0.047266
contig11551	---NA---	1.5409	0.026924	0.86172	0.20267	0.6324	0.77508	-0.10192	0.94473	-0.051319	0.95655	0.82946	0.15042
contig11572	GALT6_HUMANRecName: Full=Polypeptide N-acetylgalactosaminyltransferase 6; AltName: Full=Polypeptide GalNAc transferase 6; Short=GalNAc-T6; Short=pp-GaNTase 6; AltName: Full=Protein-UDP acetylgalactosaminyltransferase 6; AltName: Full=UDP-GalNAc:polypeptide N-acetylgalactosaminyltransferase 6	-0.52711	0.7655	0.46687	0.66634	0.50333	0.99999	-2.8115	0.19117	-3.1081	0.046384	-2.667	0.031926
contig11621	---NA---	1.9204	0.02226	1.0233	0.19555	1.3828	0.31446	-0.097416	0.95801	-0.21149	0.80973	0.3111	0.62503
contig11697	CELF1_HUMANRecName: Full=CUGBP Elav-like family member 1; Short=CELF-1; AltName: Full=50 kDa nuclear polyadenylated RNA-binding protein; AltName: Full=Bruno-like protein 2; AltName: Full=CUG triplet repeat RNA-binding protein 1; Short=CUG-BP1; AltName: Full=CUG-BP- and ETR-3-like factor 1; AltName: Full=Deadenylation factor CUG-BP; AltName: Full=Embryo deadenylation element-binding protein homolo…	1.9248	0.041893	0.15186	0.88466	0.64748	0.98505	-0.18033	0.92478	-0.62075	0.46037	-0.89217	0.24775
contig11720	---NA---	1.7332	0.057492	1.1479	0.22574	0.52167	0.99999	0.37024	0.79019	2.7631	0.021626	4.4031	5.4475e-05
contig11828	GALM_HUMANRecName: Full=Aldose 1-epimerase; AltName: Full=Galactose mutarotase	2.4655	0.02226	1.5726	0.10086	1.4475	0.39011	0.25044	0.87294	0.073377	0.95415	-0.53887	0.44889
contig11846	FGD1_MOUSERecName: Full=FYVE, RhoGEF and PH domain-containing protein 1; AltName: Full=Faciogenital dysplasia 1 protein homolog; AltName: Full=Rho/Rac guanine nucleotide exchange factor FGD1; Short=Rho/Rac GEF; AltName: Full=Zinc finger FYVE domain-containing protein 3	3.2781	0.025942	-1.0494	0.27795	0.14277	0.99999	-0.87069	0.48629	-1.2465	0.1614	-1.1912	0.18653
contig11938	---NA---	2.6048	0.040595	1.0681	0.40325	1.2655	0.73998	-0.51978	0.7792	-0.35419	0.80536	-0.14629	0.89817
contig12011	---NA---	0.96453	0.2352	-0.21373	0.80318	0.91666	0.66189	-2.4016	0.053767	-2.0171	0.086389	-2.3059	0.013244
contig12024	ZFHX4_MOUSERecName: Full=Zinc finger homeobox protein 4; AltName: Full=Zinc finger homeodomain protein 4; Short=ZFH-4	3.3337	0.042995	1.6791	0.31056	1.7344	0.70546	0.42062	0.89141	0.62697	0.71524	-0.36987	0.79659
contig12037	RBMX2_MOUSERecName: Full=RNA-binding motif protein, X-linked 2	1.8519	0.040595	1.2596	0.17417	1.4372	0.403	0.37779	0.77258	0.44185	0.61054	0.59788	0.40809
contig12064	EI2BD_BOVINRecName: Full=Translation initiation factor eIF-2B subunit delta; AltName: Full=eIF-2B GDP-GTP exchange factor subunit delta	0.40413	0.62394	0.094052	0.90332	0.29813	0.99999	0.20187	0.86697	0.57262	0.33166	1.5062	0.04477
contig12163	---NA---	3.3371	0.03758	1.6611	0.29543	1.4109	0.81778	-0.28282	0.93197	0.072055	0.97611	0.41064	0.76425
contig12225	---NA---	3.2086	0.033462	1.2324	0.40975	1.7107	0.64181	-0.34457	0.90497	-0.17205	0.93067	0.51831	0.67384
contig12246	LRP1_CHICKRecName: Full=Low-density lipoprotein receptor-related protein 1; Short=LRP-1; AltName: Full=Alpha-2-macroglobulin receptor; Short=A2MR; Flags: Precursor	3.2019	0.016285	1.3376	0.22975	1.287	0.62498	-0.16976	0.94473	0.51259	0.6342	0.64054	0.46903
contig12261	---NA---	0.75315	0.60954	1.4233	0.25983	-0.92089	0.94589	1.4836	0.38375	1.572	0.16793	2.7529	0.044021
contig12270	AASS_BOVINRecName: Full=Alpha-aminoadipic semialdehyde synthase, mitochondrial; AltName: Full=LKR/SDH; Includes: RecName: Full=Lysine ketoglutarate reductase; Short=LKR; Short=LOR; Includes: RecName: Full=Saccharopine dehydrogenase; Short=SDH; Flags: Precursor	2.0242	0.033462	0.81986	0.38394	0.85539	0.79865	0.18275	0.92272	0.41342	0.65384	0.72027	0.33944
contig12282	CHIT1_HUMANRecName: Full=Chitotriosidase-1; AltName: Full=Chitinase-1; Flags: Precursor	-1.2681	0.50369	-1.0989	0.39132	-0.49	0.99999	-2.6559	0.38339	-2.6817	0.12951	-3.2877	0.029568
contig12284	INP5K_HUMANRecName: Full=Inositol polyphosphate 5-phosphatase K; AltName: Full=Phosphatidylinositol-3,4,5-trisphosphate 5-phosphatase; AltName: Full=Phosphatidylinositol-4,5-bisphosphate 5-phosphatase; AltName: Full=Skeletal muscle and kidney-enriched inositol phosphatase	2.1534	0.044049	0.44837	0.68686	0.99982	0.79075	0.14683	0.95251	0.083137	0.95675	0.46656	0.59481
contig12316	---NA---	2.5182	0.02226	1.7381	0.10776	1.63	0.403	0.62348	0.62399	0.41078	0.69578	0.78701	0.34131
contig12422	---NA---	2.7189	0.032595	0.76585	0.55447	1.2543	0.72896	-0.28358	0.90654	-0.59938	0.61619	0.28953	0.78807
contig12513	GOR_HUMANPUTATIVE PSEUDOGENE: RecName: Full=Putative exonuclease GOR; AltName: Full=Antigen GOR homolog; AltName: Full=RNA exonuclease 1 homolog-like 1	-0.0036108	0.99803	0.029188	0.98181	-0.38727	0.99999	-0.89186	0.497	-1.1535	0.19964	-2.666	0.021193
contig12522	---NA---	1.79	0.075276	0.80598	0.44504	1.1917	0.64829	1.0095	0.45738	2.4549	0.11302	3.6081	0.0016384
contig12624	---NA---	1.5499	0.03803	0.70417	0.34421	0.67331	0.80185	0.036531	0.9855	1.1596	0.12951	2.1087	0.011623
contig12682	COG5_MOUSERecName: Full=Conserved oligomeric Golgi complex subunit 5; Short=COG complex subunit 5; AltName: Full=Component of oligomeric Golgi complex 5	0.17265	0.92172	-0.81444	0.45954	0.49203	0.99999	-2.4675	0.38339	-2.8008	0.12576	-2.6665	0.047394
contig12761	PGDH_HUMANRecName: Full=15-hydroxyprostaglandin dehydrogenase	-1.4513	0.37243	-0.37464	0.73994	-0.64159	0.99999	-1.4366	0.38795	-2.9951	0.12576	-2.9967	0.035097
contig12799	---NA---	1.0836	0.1977	0.45903	0.60707	0.1864	0.99999	-0.084654	0.96856	1.4062	0.12951	1.8717	0.044726
contig12806	LRC55_HUMANRecName: Full=Leucine-rich repeat-containing protein 55; AltName: Full=BK channel auxiliary gamma subunit LRRC55; Flags: Precursor	0.25185	0.90224	-0.58349	0.67437	0.3361	0.99999	-2.8312	0.38339	-3.1904	0.12576	-3.0868	0.044021
contig12910	---NA---	3.1899	0.043295	-0.16815	0.89125	0.84745	0.99999	-1.2874	0.39315	-1.5949	0.14014	-1.5254	0.12997
contig12921	MNT2_CANALRecName: Full=Glycolipid 2-alpha-mannosyltransferase 2; AltName: Full=Alpha-1,2-mannosyltransferase 2	-1.4396	0.37726	-1.3883	0.26729	-0.71139	0.99999	-0.59744	0.6757	-2.5014	0.12951	-2.6158	0.040421
contig12955	IF5A_SPOEXRecName: Full=Eukaryotic translation initiation factor 5A; Short=eIF-5A	0.19416	0.81324	0.73705	0.25953	0.36034	0.99999	0.57431	0.48873	1.1734	0.12951	1.81	0.013305
contig13061	NT56_DROVIRecName: Full=Lethal(2)neighbour of Tid protein; AltName: Full=NOT58	-0.21615	0.90637	-0.88852	0.47244	-0.22971	0.99999	-5.2161	0.0065767	-5.5816	0.0013376	-5.1599	0.00063175
contig13104	---NA---	2.3453	0.049081	1.0179	0.40332	1.0462	0.83861	0.18265	0.94565	0.1639	0.91896	0.49744	0.61551
contig13146	---NA---	2.3858	0.020432	1.5348	0.10772	1.7511	0.2598	0.48081	0.68503	0.39414	0.66033	0.60831	0.40176
contig13151	CP131_DANRERecName: Full=Centrosomal protein of 131 kDa; AltName: Full=5-azacytidine-induced protein 1	2.1862	0.033725	0.84322	0.40837	0.97877	0.76277	0.80491	0.51414	0.50284	0.60446	-0.36135	0.66703
contig13361	PI16_BOVINRecName: Full=Peptidase inhibitor 16; Short=PI-16; AltName: CD_antigen=CD364; Flags: Precursor	0.63789	0.35985	0.065683	0.93119	0.22	0.99999	0.48435	0.54881	0.80776	0.17669	1.8731	0.013305
contig13369	---NA---	2.6829	0.045572	0.94466	0.4981	2.0697	0.44007	-0.66167	0.7184	-1.2082	0.2911	-0.54209	0.6263
contig13425	---NA---	2.6725	0.02226	0.91106	0.38568	1.7376	0.37391	0.35997	0.82916	0.65375	0.48346	0.64575	0.4377
contig13441	BAZ1A_HUMANRecName: Full=Bromodomain adjacent to zinc finger domain protein 1A; AltName: Full=ATP-dependent chromatin-remodeling protein; AltName: Full=ATP-utilizing chromatin assembly and remodeling factor 1; Short=hACF1; AltName: Full=CHRAC subunit ACF1; AltName: Full=Williams syndrome transcription factor-related chromatin-remodeling factor 180; Short=WCRF180; AltName: Full=hWALp1	4.1876	0.049903	-1.1963	0.47291	-0.7299	0.99999	-1.6961	0.38339	-2.0614	0.12951	-1.9896	0.12695
contig13532	AIFM2_HUMANRecName: Full=Apoptosis-inducing factor 2; AltName: Full=Apoptosis-inducing factor homologous mitochondrion-associated inducer of death; AltName: Full=Apoptosis-inducing factor-like mitochondrion-associated inducer of death; AltName: Full=p53-responsive gene 3 protein	0.83931	0.2011	1.0848	0.12279	2.0961	0.028903	0.071682	0.96552	0.18077	0.81199	1.4967	0.040992
contig13550	TRAM1_CANFARecName: Full=Translocating chain-associated membrane protein 1	2.0887	0.047379	0.68379	0.53648	0.68005	0.99999	0.4519	0.7676	0.37012	0.74298	0.048139	0.96135
contig13614	---NA---	0.8902	0.20566	0.48129	0.51666	0.039751	0.99999	-0.071198	0.96825	0.84858	0.18022	1.5458	0.046644
contig13726	---NA---	2.5155	0.038275	1.0094	0.40614	0.8353	0.97788	0.44595	0.80972	0.15838	0.92118	0.11139	0.919
contig13757	EZH2_MACFARecName: Full=Histone-lysine N-methyltransferase EZH2; AltName: Full=Enhancer of zeste homolog 2	2.9422	0.029494	1.0556	0.42738	1.7353	0.53345	0.15798	0.95999	-0.21534	0.89865	1.1533	0.27788
contig13795	CEP95_HUMANRecName: Full=Centrosomal protein of 95 kDa; Short=Cep95; AltName: Full=Coiled-coil domain-containing protein 45	2.4249	0.040595	0.76516	0.53335	1.2954	0.67515	-0.27733	0.90294	-0.40917	0.74478	0.016129	0.9885
contig13810	CSDE1_RATRecName: Full=Cold shock domain-containing protein E1; AltName: Full=Protein UNR	-0.28422	0.85239	1.1165	0.29211	-0.79579	0.99214	1.5054	0.38339	1.9179	0.12951	2.3174	0.046644
contig13875	PRS45_HUMANPUTATIVE PSEUDOGENE: RecName: Full=Putative serine protease 45; AltName: Full=Serine protease 45, pseudogene; AltName: Full=Testis serine protease 5	1.2605	0.12466	0.42607	0.62985	0.44476	0.99999	0.063938	0.97556	1.2173	0.13668	1.8209	0.048507
contig13922	---NA---	2.2317	0.049081	0.70276	0.55884	0.33124	0.99999	0.20158	0.93321	-0.23801	0.86608	-1.2272	0.1995
contig13994	DPOM_NEUINRecName: Full=Probable DNA polymerase	1.4156	0.13323	0.75988	0.44678	0.42628	0.99999	1.7675	0.38339	0.86572	0.29789	2.2189	0.039058
contig14066	---NA---	3.5543	0.03712	0.046346	0.98178	0.82416	0.99999	-0.46404	0.89302	-0.6122	0.75844	-1.1764	0.46988
contig14078	TAF2_DANRERecName: Full=Transcription initiation factor TFIID subunit 2; AltName: Full=TBP-associated factor 150 kDa; AltName: Full=Transcription initiation factor TFIID 150 kDa subunit; Short=TAF(II)150; Short=TAFII-150; Short=TAFII150	2.4533	0.02226	1.0624	0.286	1.6406	0.37913	0.055057	0.98258	-0.0089073	0.99569	0.2258	0.79364
contig14080	LRP1_CHICKRecName: Full=Low-density lipoprotein receptor-related protein 1; Short=LRP-1; AltName: Full=Alpha-2-macroglobulin receptor; Short=A2MR; Flags: Precursor	1.9745	0.04195	1.4409	0.15285	0.76261	0.90941	0.58979	0.62532	1.1479	0.1808	2.2635	0.032358
contig14101	---NA---	2.0568	0.040595	2.3293	0.053854	0.67462	0.99214	1.2118	0.38339	0.8325	0.32852	1.334	0.13019
contig14152	---NA---	2.4907	0.25855	0.79887	0.72473	0.40727	0.99999	-0.44909	0.91989	-3.7192	0.12951	-5.8332	0.017572
contig14212	---NA---	2.3079	0.017392	0.75555	0.36985	1.2293	0.45993	0.056323	0.97881	0.32354	0.70783	0.72474	0.28418
contig14216	---NA---	0.33468	0.63334	0.072472	0.91243	-0.25859	0.99999	0.28981	0.71594	0.81311	0.14261	1.3046	0.041312
contig14223	---NA---	2.037	0.02226	1.7439	0.063331	1.1649	0.48143	0.0048578	0.99857	-0.39741	0.6182	-0.18149	0.80002
contig14250	RL18A_HUMANRecName: Full=60S ribosomal protein L18a; AltName: Full=Large ribosomal subunit protein eL20	1.7398	0.029834	1.3057	0.11202	0.66826	0.84753	0.0038445	0.99862	0.15688	0.87054	-0.76796	0.22914
contig14272	---NA---	-0.93328	0.57506	-1.0422	0.34465	-0.10071	0.99999	-0.95961	0.45394	-1.3189	0.17972	4.3927	0.013774
contig14286	TMPS3_HUMANRecName: Full=Transmembrane protease serine 3; AltName: Full=Serine protease TADG-12; AltName: Full=Tumor-associated differentially-expressed gene 12 protein	1.2651	0.19363	0.44576	0.66515	-0.23749	0.99999	0.057737	0.98147	1.0809	0.2045	2.3188	0.032358
contig14360	LRSM1_MOUSERecName: Full=E3 ubiquitin-protein ligase LRSAM1; AltName: Full=Leucine-rich repeat and sterile alpha motif-containing protein 1; AltName: Full=RING-type E3 ubiquitin transferase LRSAM1; AltName: Full=Tsg101-associated ligase	2.599	0.04366	0.58247	0.66366	0.7597	0.99999	0.084808	0.97884	0.04369	0.98341	-0.18883	0.8707
contig14393	RADI_MOUSERecName: Full=Radixin; AltName: Full=ESP10	3.2573	0.02226	1.2428	0.33622	1.6153	0.5657	-0.50513	0.79172	0.07748	0.96616	-0.3624	0.74126
contig14421	TMF1_HUMANRecName: Full=TATA element modulatory factor; Short=TMF; AltName: Full=Androgen receptor coactivator 160 kDa protein; AltName: Full=Androgen receptor-associated protein of 160 kDa	2.6719	0.03712	0.94385	0.46599	1.0143	0.90155	-0.18626	0.94705	0.044041	0.98273	0.37288	0.72843
contig14451	---NA---	0.35969	0.72704	1.5546	0.091218	-0.40369	0.99999	1.0188	0.38339	1.4755	0.12951	1.8599	0.038199
contig14521	---NA---	1.9632	0.017629	1.5501	0.059588	1.6274	0.15668	0.66941	0.47802	0.66511	0.27335	1.3106	0.077103
contig14566	---NA---	2.2656	0.044656	1.4155	0.2178	1.8842	0.37913	-0.060528	0.98041	-0.36135	0.73402	0.47869	0.55693
contig14658	---NA---	-0.33963	0.79487	-0.78875	0.41639	-0.4018	0.99999	-1.4849	0.38339	-2.3669	0.12173	-2.2499	0.040992
contig14774	---NA---	0.18125	0.86394	0.67312	0.40601	-0.3389	0.99999	0.46908	0.64221	2.1879	0.042431	3.5155	0.00010186
contig14832	MVP_STRPURecName: Full=Major vault protein; Short=MVP	0.43221	0.63621	0.88466	0.25067	0.25783	0.99999	1.0417	0.38339	1.4092	0.12951	1.9506	0.021087
contig14890	SACS_HUMANRecName: Full=Sacsin; AltName: Full=DnaJ homolog subfamily C member 29; Short=DNAJC29	2.2291	0.064104	1.3757	0.2677	1.0685	0.84017	0.54686	0.75481	0.14707	0.92898	-2.8802	0.032358
contig15014	---NA---	2.1395	0.022067	0.31793	0.70912	1.2347	0.45767	0.12486	0.94562	-0.30473	0.72416	0.038117	0.96086
contig15020	TOPRS_MOUSERecName: Full=E3 ubiquitin-protein ligase Topors; AltName: Full=RING-type E3 ubiquitin transferase Topors; AltName: Full=SUMO1-protein E3 ligase Topors; AltName: Full=Topoisomerase I-binding RING finger protein; AltName: Full=Topoisomerase I-binding arginine/serine-rich protein; AltName: Full=Tumor suppressor p53-binding protein 3; Short=p53-binding protein 3; Short=p53BP3	2.4741	0.045864	0.67827	0.60259	1.9894	0.403	-0.50544	0.78175	-0.92539	0.39254	-0.98986	0.32623
contig15052	---NA---	-0.29381	0.893	1.6325	0.2592	-1.2929	0.8082	1.5031	0.42215	2.1635	0.13151	3.1544	0.044726
contig15195	TCB2_CAEBRRecName: Full=Transposable element Tcb2 transposase	1.5833	0.027973	1.0343	0.15037	0.9879	0.48033	0.37196	0.68209	0.62377	0.28783	0.84765	0.15966
contig15224	---NA---	2.4296	0.023477	1.6288	0.12252	1.6264	0.39011	0.79554	0.51569	0.3859	0.71023	1.1664	0.17564
contig15334	---NA---	1.9946	0.0841	1.4188	0.23772	0.63289	0.99999	0.54796	0.74097	1.3504	0.19114	2.6154	0.043927
contig15394	XPF_CRIGRRecName: Full=DNA repair endonuclease XPF; AltName: Full=DNA excision repair protein ERCC-4	2.6357	0.034312	1.263	0.30375	1.167	0.77877	-0.37107	0.85913	-0.83208	0.44046	-0.41766	0.68319
contig15427	CO6A5_MOUSERecName: Full=Collagen alpha-5(VI) chain; AltName: Full=Collagen alpha-1(XXIX) chain; Flags: Precursor	2.495	0.044662	1.3747	0.27186	2.1657	0.33946	-0.7764	0.66375	-0.17559	0.92444	1.6417	0.1715
contig15520	---NA---	-1.4574	0.40988	-0.76413	0.55496	0.091215	0.99999	-2.8904	0.33903	-3.4314	0.064067	-3.4588	0.021087
contig15527	---NA---	1.8283	0.022067	1.0473	0.1526	1.1834	0.37165	-0.16255	0.90585	-0.077055	0.93542	0.47408	0.40323
contig15574	---NA---	2.4201	0.017392	0.89859	0.30148	1.3817	0.403	-0.21858	0.89257	-0.11656	0.91994	-0.41342	0.55567
contig15575	HELZ2_HUMANRecName: Full=Helicase with zinc finger domain 2; AltName: Full=ATP-dependent helicase PRIC285; AltName: Full=Helicase with zinc finger 2, transcriptional coactivator; AltName: Full=PPAR-alpha-interacting complex protein 285; AltName: Full=PPAR-gamma DNA-binding domain-interacting protein 1; Short=PDIP1; Short=PPAR-gamma DBD-interacting protein 1; AltName: Full=Peroxisomal proliferator…	3.0593	0.03045	0.9513	0.50418	1.4433	0.70635	-0.22082	0.94144	-0.43162	0.77413	-0.29246	0.80789
contig15715	TBCEL_HUMANRecName: Full=Tubulin-specific chaperone cofactor E-like protein; Short=EL; AltName: Full=Leucine-rich repeat-containing protein 35	1.7424	0.025942	0.67284	0.36327	1.0918	0.45993	-0.084505	0.96247	0.35491	0.61656	0.78887	0.19809
contig15743	IGF1R_MOUSERecName: Full=Insulin-like growth factor 1 receptor; AltName: Full=Insulin-like growth factor I receptor; Short=IGF-I receptor; AltName: CD_antigen=CD221; Contains: RecName: Full=Insulin-like growth factor 1 receptor alpha chain; Contains: RecName: Full=Insulin-like growth factor 1 receptor beta chain; Flags: Precursor	2.3062	0.02226	0.40896	0.66543	0.91729	0.73732	0.077012	0.9728	0.26563	0.79586	-0.2352	0.7664
contig15764	---NA---	2.5889	0.0086107	1.2244	0.14395	1.2747	0.4084	0.048789	0.98041	0.42696	0.57708	0.69204	0.29083
contig15779	---NA---	1.3311	0.046942	0.63627	0.35029	0.45998	0.98608	0.041667	0.98025	0.23256	0.7471	0.59241	0.2786
contig15795	SWR1_YEASTRecName: Full=Helicase SWR1; AltName: Full=Swi2/Snf2-related 1	2.6552	0.040595	0.6167	0.6434	1.049	0.88664	-0.58751	0.74342	-0.66756	0.58528	-0.40211	0.71135
contig15887	R3HD4_HUMANRecName: Full=R3H domain-containing protein 4	1.4178	0.042579	0.1463	0.84524	0.57836	0.88063	-0.53343	0.52891	-0.43915	0.48606	-0.72341	0.21324
contig15904	PHF14_HUMANRecName: Full=PHD finger protein 14	3.3654	0.019989	1.9281	0.13948	2.6853	0.19179	-0.18583	0.94705	-0.28756	0.84849	0.062726	0.95784
contig15967	---NA---	-3.4204	0.04896	-3.4761	0.053854	-2.1824	0.54077	-0.9262	0.48873	-1.2906	0.17597	-1.2376	0.1995
contig15996	---NA---	2.2531	0.027095	0.68507	0.49251	1.3193	0.52473	-0.097119	0.968	-0.38853	0.69681	-0.40631	0.60898
contig16002	TRI56_BOVINRecName: Full=E3 ubiquitin-protein ligase TRIM56; AltName: Full=RING-type E3 ubiquitin transferase TRIM56; AltName: Full=Tripartite motif-containing protein 56	1.9171	0.040757	0.52209	0.59425	0.76512	0.88543	-0.1374	0.94726	0.040616	0.97707	-0.041268	0.96239
contig16074	---NA---	1.8796	0.041092	1.7894	0.084202	1.3511	0.46008	0.22465	0.89678	0.10881	0.92941	0.89946	0.23212
contig16127	MESD_DROMERecName: Full=LDLR chaperone boca; Flags: Precursor	0.73096	0.52495	1.0392	0.30811	-0.5656	0.99999	1.217	0.3835	1.4252	0.13925	2.6301	0.021087
contig16148	SYP2_BACC1RecName: Full=Proline--tRNA ligase 2; AltName: Full=Prolyl-tRNA synthetase 2; Short=ProRS 2	1.0064	0.34782	1.2733	0.22531	0.78002	0.93077	0.93843	0.48719	1.2181	0.18216	2.6683	0.021087
contig16349	Y1101_SYNY3RecName: Full=Universal stress protein Slr1101; Short=USP Slr1101	2.4103	0.017513	1.2664	0.16291	1.1595	0.53345	0.15962	0.92979	-0.099322	0.93278	0.20617	0.78663
contig16391	---NA---	1.8156	0.030823	1.3539	0.11546	1.3568	0.37913	0.15902	0.92317	0.19909	0.83595	1.1023	0.12923
contig16406	---NA---	1.8933	0.029068	2.4683	0.028111	1.8185	0.18275	0.0052522	0.99839	0.53159	0.47814	-1.5099	0.079787
contig16419	---NA---	2.5739	0.038275	0.74054	0.56562	1.3105	0.69457	-0.37406	0.85831	0.23802	0.87652	-1.0569	0.28869
contig16642	---NA---	2.4033	0.04016	0.47956	0.68949	1.0282	0.82156	-0.30631	0.88527	-0.62072	0.56945	-0.81593	0.38198
contig16745	POP1_HUMANRecName: Full=Ribonucleases P/MRP protein subunit POP1; Short=hPOP1	2.6216	0.02226	1.1059	0.28313	1.8021	0.33789	-0.077251	0.97549	0.19039	0.88362	0.27561	0.75585
contig16827	---NA---	2.074	0.041147	0.67034	0.52612	1.3896	0.51846	-0.39191	0.79718	-0.58199	0.53395	-0.53217	0.51461
contig16845	TSNAX_HUMANRecName: Full=Translin-associated protein X; AltName: Full=Translin-associated factor X	-0.026756	0.9891	-0.66609	0.59501	0.35323	0.99999	-2.8372	0.32204	-3.3271	0.053527	-2.865	0.036141
contig16975	---NA---	3.229	0.016719	1.9466	0.10463	2.7836	0.14877	-0.0080167	0.99818	-0.39226	0.74401	0.55255	0.54326
contig17045	---NA---	1.4424	0.1078	1.2235	0.19696	0.51418	0.99999	1.096	0.38397	0.67924	0.39868	2.0408	0.043769
contig17072	YPF17_PLAF7RecName: Full=Protein PF14_0175	2.4702	0.033462	1.5806	0.17613	1.5442	0.52555	0.5195	0.74284	0.47244	0.68235	0.40811	0.66581
contig17123	---NA---	2.5743	0.027973	0.46875	0.68734	0.50682	0.99999	-0.71949	0.60151	-0.38336	0.75078	-0.46043	0.61902
contig17197	---NA---	2.3228	0.025942	0.97906	0.31916	1.1896	0.5944	0.35553	0.81485	0.14501	0.91046	-0.089007	0.92045
contig17304	PR38B_DANRERecName: Full=Pre-mRNA-splicing factor 38B	2.3692	0.039117	0.84542	0.46805	1.5408	0.52642	-0.67179	0.63803	-0.61429	0.56519	-0.61806	0.49883
contig17368	S20A1_XENTRRecName: Full=Sodium-dependent phosphate transporter 1; AltName: Full=Solute carrier family 20 member 1	0.50882	0.79888	-0.024498	0.989	0.55477	0.99999	-3.6914	0.32775	-3.6384	0.12951	-4.5714	0.01594
contig17443	---NA---	2.2112	0.044561	0.5784	0.61533	1.6373	0.45993	-0.37371	0.83475	-0.28417	0.82387	0.23626	0.80687
contig17488	FNBP1_XENLARecName: Full=Formin-binding protein 1 homolog	2.1406	0.038275	0.80065	0.44231	1.0032	0.75629	0.065049	0.97994	-0.2283	0.85332	0.031438	0.97364
contig17562	---NA---	0.72628	0.77635	1.6601	0.41756	-0.63773	0.99999	3.6032	0.38339	7.8845	0.0015786	9.2477	5.9853e-05
contig17581	---NA---	2.2234	0.044662	0.16589	0.89417	1.3713	0.58259	-0.8561	0.52467	-0.94926	0.31767	-1.2821	0.17924
contig17610	SYP2L_HUMANRecName: Full=Synaptopodin 2-like protein	2.3793	0.046044	1.4322	0.23736	1.1194	0.7898	-0.49348	0.77902	-0.91697	0.37606	-1.277	0.2012
contig17716	---NA---	2.8166	0.041872	1.3098	0.3488	1.4485	0.70824	0.37906	0.87768	0.11892	0.95186	-0.065047	0.96016
contig17717	---NA---	1.274	0.15415	1.0997	0.1949	0.35482	0.99999	1.2152	0.38339	1.6866	0.12951	1.9362	0.033003
contig17742	---NA---	1.3099	0.095742	0.87002	0.28665	0.44864	0.99999	0.4778	0.64058	1.7453	0.12951	2.5709	0.0049881
contig17796	SRPK2_MOUSERecName: Full=SRSF protein kinase 2; AltName: Full=SFRS protein kinase 2; AltName: Full=Serine/arginine-rich protein-specific kinase 2; Short=SR-protein-specific kinase 2; Contains: RecName: Full=SRSF protein kinase 2 N-terminal; Contains: RecName: Full=SRSF protein kinase 2 C-terminal	1.9371	0.040394	1.0274	0.27532	0.79982	0.85283	0.54761	0.64256	0.59836	0.47534	1.0796	0.17891
contig17854	---NA---	0.1992	0.9314	-1.6808	0.16513	0.096208	0.99999	-2.44	0.38339	-2.8154	0.12576	-2.666	0.044726
contig17865	---NA---	0.32317	0.77113	0.59696	0.51222	-0.46456	0.99999	0.45203	0.70013	0.94882	0.20741	1.9492	0.041622
contig17877	---NA---	2.6333	0.046832	0.34687	0.80393	1.1325	0.85555	0.22205	0.93762	-0.28841	0.85831	0.071385	0.9545
contig17884	---NA---	0.7947	0.32264	0.64344	0.42026	0.085034	0.99999	0.36454	0.73978	1.1138	0.13873	2.1364	0.015711
contig17904	---NA---	1.7866	0.04896	0.65076	0.4886	0.46477	0.99999	0.092686	0.96762	-0.20007	0.85679	0.52433	0.47476
contig18020	---NA---	1.7683	0.048926	0.72294	0.42999	1.253	0.49837	-0.37914	0.77255	0.022311	0.98853	0.98362	0.19487
contig18163	---NA---	2.3405	0.033336	1.4051	0.20114	2.1553	0.24544	-0.17967	0.93741	-0.53266	0.60662	-0.57571	0.50471
contig18330	---NA---	1.7543	0.040394	0.36234	0.67945	0.91493	0.68879	-0.017754	0.99374	-0.32125	0.71633	0.4331	0.52602
contig18379	---NA---	-0.51806	0.58436	0.25113	0.76783	-0.58818	0.95372	0.53127	0.5934	0.86043	0.21731	1.7562	0.048408
contig18528	---NA---	2.2797	0.036256	1.3205	0.22283	1.3692	0.55612	0.27067	0.89255	0.054038	0.97253	1.012	0.24718
contig18694	---NA---	2.4597	0.020432	1.1766	0.21446	1.6213	0.33946	-0.26527	0.87131	0.15661	0.89575	0.42053	0.57942
contig18760	---NA---	2.9727	0.016719	1.4514	0.17278	1.8875	0.29407	0.41988	0.78088	0.18572	0.88739	-0.15459	0.86724
contig18866	---NA---	2.1468	0.044904	1.0702	0.32432	1.5001	0.49837	-0.08392	0.97484	0.36837	0.75011	0.20678	0.82779
contig18930	BRE4_CAEBRRecName: Full=Beta-1,4-N-acetylgalactosaminyltransferase bre-4; AltName: Full=Bacillus thuringiensis toxin-resistant protein 4; Short=Bt toxin-resistant protein 4; AltName: Full=Beta-4-GalNAcT	1.508	0.05746	0.52884	0.53165	0.98104	0.59586	0.045671	0.98223	0.63337	0.36488	2.3393	0.011148
contig18946	---NA---	1.5679	0.10118	1.9249	0.083954	1.1993	0.59455	0.91656	0.47974	1.1378	0.18625	2.2989	0.032576
contig19048	---NA---	1.6633	0.04195	0.80855	0.32588	0.19301	0.99999	0.01363	0.99444	0.16449	0.87078	-0.30946	0.64841
contig19077	B3GN3_MOUSERecName: Full=N-acetyllactosaminide beta-1,3-N-acetylglucosaminyltransferase 3; AltName: Full=Core 1 extending beta-1,3-N-acetylglucosaminyltransferase; AltName: Full=Core1-beta3GlcNAcT; AltName: Full=UDP-GlcNAc:betaGal beta-1,3-N-acetylglucosaminyltransferase 3; Short=BGnT-3; Short=Beta-1,3-Gn-T3; Short=Beta-1,3-N-acetylglucosaminyltransferase 3; Short=Beta3Gn-T3	1.3913	0.084789	-0.23165	0.79058	0.34974	0.99999	0.29515	0.82192	1.3968	0.12951	2.2884	0.013774
contig19191	---NA---	3.5525	0.026924	-0.65743	0.55001	0.38611	0.99999	-0.87847	0.50311	-1.2119	0.19162	-0.94737	0.27078
contig19193	GXLT2_MOUSERecName: Full=Glucoside xylosyltransferase 2; AltName: Full=Glycosyltransferase 8 domain-containing protein 4	2.796	0.033462	3.3621	0.047689	0.80172	0.99999	-0.35938	0.8927	0.99938	0.42502	-3.8344	0.017492
contig19239	---NA---	2.0611	0.033953	0.15034	0.88712	0.36936	0.99999	-0.69281	0.54562	-0.23891	0.82968	-0.26739	0.74373
contig19267	---NA---	2.9628	0.044662	0.97156	0.52334	2.3131	0.66561	-0.1903	0.95569	-0.057687	0.97994	0.49551	0.68491
contig19303	PTN11_CHICKRecName: Full=Tyrosine-protein phosphatase non-receptor type 11; AltName: Full=SH-PTP2; Short=cSH-PTP2	2.9347	0.048262	1.5205	0.31056	3.1503	0.20599	-0.055396	0.98854	-1.19	0.35348	-0.19254	0.88679
contig19348	---NA---	2.8265	0.040595	1.1851	0.39306	1.2691	0.79399	-0.17083	0.9589	-0.31381	0.84791	-0.261	0.82903
contig19368	---NA---	2.5516	0.026924	0.935	0.39894	1.5192	0.49837	0.19378	0.93261	0.33335	0.78249	0.59602	0.49793
contig19405	RN213_HUMANRecName: Full=E3 ubiquitin-protein ligase RNF213; AltName: Full=ALK lymphoma oligomerization partner on chromosome 17; AltName: Full=Mysterin; AltName: Full=RING finger protein 213; AltName: Full=RING-type E3 ubiquitin transferase RNF213	3.2413	0.026388	1.0978	0.43443	2.0156	0.46447	-0.026942	0.99383	-0.1428	0.93982	0.098781	0.93884
contig19522	---NA---	2.1378	0.04896	0.86041	0.43824	0.59963	0.99999	0.13291	0.95979	0.04995	0.97601	-0.60091	0.49348
contig19569	---NA---	1.6339	0.048801	0.90183	0.28128	0.87914	0.70184	0.42135	0.707	0.40369	0.61605	1.1291	0.1275
contig19621	---NA---	-4.7968	0.045572	-4.19	0.06493	-3.9733	0.34932	-0.91639	0.5802	-1.1836	0.36123	-0.97896	0.50287
contig19636	BRAF_HUMANRecName: Full=Serine/threonine-protein kinase B-raf; AltName: Full=Proto-oncogene B-Raf; AltName: Full=p94; AltName: Full=v-Raf murine sarcoma viral oncogene homolog B1	2.5217	0.040394	0.80406	0.527	1.0777	0.82579	0.18181	0.94676	0.50957	0.68054	-1.2335	0.22063
contig19661	---NA---	0.62285	0.76232	0.41497	0.74167	1.5468	0.78971	0.47225	0.7629	2.2972	0.12951	4.3037	0.0015408
contig19810	---NA---	2.4031	0.049081	0.91141	0.4691	1.5721	0.55612	-0.55853	0.74467	-0.99947	0.34214	0.11506	0.91796
contig19818	---NA---	1.8352	0.02956	0.64912	0.43526	1.0955	0.52971	0.24251	0.86488	0.06441	0.95606	0.0035185	0.99656
contig19819	---NA---	2.37	0.038721	1.3741	0.2314	1.7898	0.4084	-0.16916	0.94676	-0.067234	0.96694	-0.20767	0.8359
contig19879	---NA---	4.1103	0.02733	-1.0275	0.43452	-0.1412	0.99999	-0.95292	0.48166	-1.3081	0.17001	-1.2836	0.18726
contig19918	NAC1_CAVPORecName: Full=Sodium/calcium exchanger 1; AltName: Full=Na(+)/Ca(2+)-exchange protein 1; AltName: Full=Solute carrier family 8 member 1; Flags: Precursor	2.562	0.033953	0.56775	0.64396	0.909	0.92027	-0.4273	0.8169	0.02347	0.9902	-0.47224	0.6299
contig20025	IKKE_MOUSERecName: Full=Inhibitor of nuclear factor kappa-B kinase subunit epsilon; Short=I-kappa-B kinase epsilon; Short=IKK-E; Short=IKK-epsilon; Short=IkBKE; AltName: Full=Inducible I kappa-B kinase; Short=IKK-i	2.0919	0.043294	0.21326	0.84747	0.78316	0.92844	-0.43944	0.76937	-0.44489	0.66817	-0.20689	0.8201
contig20083	---NA---	2.2048	0.02226	1.4526	0.10743	1.8714	0.18275	-0.063613	0.97592	-0.13383	0.90419	0.026677	0.97319
contig20091	GCNT3_HUMANRecName: Full=Beta-1,3-galactosyl-O-glycosyl-glycoprotein beta-1,6-N-acetylglucosaminyltransferase 3; AltName: Full=C2GnT-mucin type; Short=C2GnT-M; Short=hC2GnT-M; AltName: Full=Core 2/core 4 beta-1,6-N-acetylglucosaminyltransferase; Short=C2/4GnT	2.8697	0.019232	2.3848	0.053854	2.4629	0.15668	0.22386	0.91724	-0.19941	0.88189	1.4442	0.1275
contig20110	5NTC_XENLARecName: Full=Cytosolic purine 5'-nucleotidase; AltName: Full=Cytosolic 5'-nucleotidase II	2.4884	0.022643	1.0564	0.29898	1.5001	0.45993	-0.080096	0.97424	-0.44232	0.66125	0.59896	0.46207
contig20139	GLT10_CAEBRRecName: Full=Putative polypeptide N-acetylgalactosaminyltransferase 10; Short=pp-GaNTase 10; AltName: Full=Protein-UDP acetylgalactosaminyltransferase 10; AltName: Full=UDP-GalNAc:polypeptide N-acetylgalactosaminyltransferase 10	0.49707	0.65828	0.42547	0.65809	-0.21565	0.99999	1.0456	0.39593	1.1807	0.16346	2.1255	0.035968
contig20214	APC5_RATRecName: Full=Anaphase-promoting complex subunit 5; Short=APC5; AltName: Full=Cyclosome subunit 5	2.2629	0.038461	0.95262	0.38463	1.279	0.6161	-0.50554	0.7368	-0.70242	0.46705	0.0061057	0.99532
contig20299	DDX23_HUMANRecName: Full=Probable ATP-dependent RNA helicase DDX23; AltName: Full=100 kDa U5 snRNP-specific protein; AltName: Full=DEAD box protein 23; AltName: Full=PRP28 homolog; AltName: Full=U5-100kD	-1.1009	0.58151	-1.1305	0.43406	0.84592	0.99999	-4.2153	0.053767	-4.5677	0.02599	-4.2979	0.029982
contig20301	CAH3_CAEELRecName: Full=Putative carbonic anhydrase 3; AltName: Full=Carbonate dehydratase 3	-0.27728	0.87095	-0.42853	0.71841	0.70855	0.99999	-2.7498	0.38339	-2.5142	0.12951	-3.2886	0.026391
contig20364	---NA---	1.3235	0.035591	1.4355	0.053854	0.32257	0.99999	0.49182	0.51502	0.8753	0.13828	0.74528	0.16421
contig20495	---NA---	2.0091	0.048769	0.6552	0.54043	1.3183	0.55148	-0.66502	0.59409	-0.56103	0.55751	-2.1615	0.05075
contig20589	CF251_HUMANRecName: Full=Cilia- and flagella-associated protein 251; Short=CFAP251; AltName: Full=WD repeat-containing protein 66	1.9891	0.041951	-0.48511	0.63201	0.41281	0.99999	-0.51952	0.68723	-0.4101	0.67878	-0.47467	0.54852
contig20643	---NA---	2.2743	0.031063	1.6069	0.13408	1.5111	0.45993	-0.024217	0.99287	-0.024473	0.98873	-0.24276	0.78592
contig20646	---NA---	0.31005	0.81434	1.8349	0.10086	-0.6306	0.99999	1.8059	0.38339	2.1826	0.12951	2.6808	0.021087
contig20647	---NA---	2.313	0.02226	0.99054	0.28806	1.3362	0.47452	0.033776	0.9888	-0.56413	0.50325	-0.89838	0.2374
contig20782	DRC1_MOUSERecName: Full=Dynein regulatory complex protein 1; AltName: Full=Coiled-coil domain-containing protein 164	2.068	0.027973	1.1903	0.19514	1.3228	0.45993	0.284	0.84941	0.26016	0.79686	-0.69857	0.336
contig20804	TMLH_BOVINRecName: Full=Trimethyllysine dioxygenase, mitochondrial; AltName: Full=Epsilon-trimethyllysine 2-oxoglutarate dioxygenase; AltName: Full=TML hydroxylase; AltName: Full=TML-alpha-ketoglutarate dioxygenase; Short=TML dioxygenase; Short=TMLD; Flags: Precursor	1.8166	0.01847	0.69625	0.29952	1.4193	0.19806	-0.37084	0.66788	-0.3127	0.63267	0.28026	0.60933
contig20870	---NA---	1.5268	0.033134	0.81382	0.2487	0.75806	0.68464	0.42097	0.62909	0.43682	0.48779	0.83131	0.1688
contig20928	RPC5_MOUSERecName: Full=DNA-directed RNA polymerase III subunit RPC5; Short=RNA polymerase III subunit 5; Short=RNA polymerase III subunit C5; AltName: Full=Sex-lethal interactor homolog; Short=Sxl interactor	-4.2885	0.023477	-5.1915	0.028111	-4.1118	0.22178	-0.91523	0.52599	-0.87657	0.39712	-0.27365	0.80833
contig20957	SNAA_MOUSERecName: Full=Alpha-soluble NSF attachment protein; Short=SNAP-alpha; AltName: Full=N-ethylmaleimide-sensitive factor attachment protein alpha	2.1008	0.027973	0.63311	0.50244	1.3763	0.45003	-0.51647	0.65815	-0.47197	0.58677	-0.35596	0.63723
contig21137	---NA---	1.9719	0.029189	0.97957	0.2636	1.0022	0.64829	0.13073	0.94623	0.085866	0.94305	1.0023	0.17968
contig21180	---NA---	1.2566	0.18809	1.8052	0.094268	0.051001	0.99999	1.5733	0.38339	1.5273	0.12951	2.1696	0.041559
contig21198	---NA---	0.24061	0.82365	0.78329	0.36265	-0.35204	0.99999	1.2946	0.38339	1.03	0.17617	2.0349	0.029982
contig21234	---NA---	0.41203	0.78164	-0.63993	0.6044	-1.1165	0.99526	-2.4575	0.38339	-3.2897	0.10228	-3.2307	0.031152
contig21278	---NA---	-0.20303	0.86599	-0.1484	0.88267	-0.15234	0.99999	0.50684	0.66593	1.2271	0.14824	2.1952	0.029568
contig21355	---NA---	2.3893	0.022067	1.4476	0.13063	0.90856	0.74638	0.84501	0.48236	0.6854	0.38773	-0.036256	0.96623
contig21488	---NA---	2.7832	0.035881	2.2535	0.10463	0.50065	0.99999	1.5831	0.38339	1.5302	0.18245	1.5728	0.16399
contig21596	---NA---	1.9266	0.048769	1.0059	0.30761	1.0552	0.69062	0.65904	0.58075	0.91371	0.27184	1.94	0.063809
contig21731	CNDH2_XENLARecName: Full=Condensin-2 complex subunit H2; AltName: Full=Non-SMC condensin II complex subunit H2	2.8553	0.03712	0.66512	0.6315	1.8191	0.52642	-1.1473	0.52665	-1.2493	0.32852	1.6528	0.19237
contig21816	---NA---	2.5228	0.049081	-0.59845	0.61489	0.14169	0.99999	-1.5337	0.38339	-1.8165	0.12951	-1.7428	0.089911
contig21951	---NA---	-0.8619	0.54735	-0.83758	0.37957	-0.085991	0.99999	-2.2604	0.32204	-2.5978	0.056725	-2.5145	0.024556
contig22114	---NA---	1.2078	0.088206	1.5296	0.065554	2.4352	0.025501	-0.039396	0.98373	0.30253	0.68532	1.565	0.048507
contig22139	---NA---	3.6011	0.016807	2.5997	0.068593	1.625	0.55043	-0.70369	0.70954	1.0813	0.37142	-3.2775	0.033491
contig22216	RAD21_BOVINRecName: Full=Double-strand-break repair protein rad21 homolog; Contains: RecName: Full=64-kDa C-terminal product; AltName: Full=64-kDa carboxy-terminal product	1.6382	0.044561	0.83418	0.31056	1.1374	0.49837	0.26395	0.84535	0.21107	0.82321	0.43995	0.50409
contig22271	---NA---	1.664	0.14066	0.6337	0.60513	0.39599	0.99999	0.67287	0.65241	1.3757	0.18245	2.5108	0.048467
contig22424	---NA---	4.5232	0.02226	-0.88845	0.4844	0.13972	0.99999	-0.34465	0.87382	-1.2742	0.22739	-0.81065	0.41357
contig22503	---NA---	0.96899	0.11836	1.6184	0.053433	0.63283	0.75473	0.69421	0.41166	1.0359	0.12951	1.6611	0.021087
contig22649	CNTN4_HUMANRecName: Full=Contactin-4; AltName: Full=Brain-derived immunoglobulin superfamily protein 2; Short=BIG-2; Flags: Precursor	1.4575	0.044662	1.3735	0.093035	1.8098	0.14877	0.24966	0.83231	-0.96468	0.15394	-0.036143	0.95818
contig22704	---NA---	2.0941	0.02956	1.0595	0.26056	0.60113	0.99999	0.062582	0.97881	0.14589	0.90487	-0.38517	0.61582
contig22713	---NA---	2.1858	0.026924	1.0723	0.25636	1.8596	0.24934	0.28015	0.86236	0.3223	0.74808	1.9069	0.059245
contig22740	PYR1_SQUACRecName: Full=CAD protein; Includes: RecName: Full=Glutamine-dependent carbamoyl-phosphate synthase; Includes: RecName: Full=Aspartate carbamoyltransferase; Includes: RecName: Full=Dihydroorotase	-0.60512	0.72244	-0.5678	0.5919	0.57672	0.99999	-3.7845	0.031763	-4.0889	0.0050182	-3.8467	0.0027592
contig22762	---NA---	1.7929	0.026388	1.085	0.16921	1.1368	0.45993	0.074121	0.96902	0.46766	0.4991	0.86166	0.18661
contig22784	---NA---	2.9174	0.027973	1.6118	0.21442	2.2595	0.33254	0.18189	0.94927	0.2772	0.85785	-0.55135	0.59627
contig22800	---NA---	1.5002	0.049081	0.28915	0.71624	0.57941	0.92955	0.097214	0.95786	-0.028696	0.9814	0.5585	0.36841
contig22867	---NA---	2.3566	0.03712	1.4801	0.19446	1.003	0.80938	0.55797	0.71037	0.1215	0.93554	0.72086	0.41945
contig23010	---NA---	0.2309	0.88503	1.3252	0.26766	-0.4628	0.99999	1.5895	0.38339	1.8824	0.12951	2.5499	0.048467
contig23045	TEKT4_XENLARecName: Full=Tektin-4	1.7784	0.02733	0.2871	0.71706	0.69333	0.80677	0.1752	0.90662	-0.067635	0.95083	0.02797	0.96913
contig23125	TCRG1_HUMANRecName: Full=Transcription elongation regulator 1; AltName: Full=TATA box-binding protein-associated factor 2S; AltName: Full=Transcription factor CA150	2.3052	0.048801	1.3312	0.2609	1.3778	0.62166	0.42948	0.8142	0.48056	0.68922	0.66275	0.4828
contig23174	CH082_BOVINRecName: Full=UPF0598 protein C8orf82 homolog	-5.0362	0.02476	-5.1055	0.031486	-3.1843	0.37769	-0.89417	0.51614	-1.2369	0.24506	-0.95896	0.42578
contig23179	---NA---	4.3322	0.019749	-0.37757	0.73878	0.8313	0.99214	-1.1991	0.41019	-1.0757	0.24993	-1.4121	0.14539
contig23244	---NA---	2.9256	0.02226	1.4792	0.21239	0.82385	0.96654	-0.19045	0.93913	-1.24	0.2123	-0.63741	0.49493
contig23417	IF4E_RATRecName: Full=Eukaryotic translation initiation factor 4E; Short=eIF-4E; Short=eIF4E; AltName: Full=eIF-4F 25 kDa subunit; AltName: Full=mRNA cap-binding protein	1.5211	0.046527	0.63435	0.41463	0.96749	0.5657	0.022392	0.99153	-0.28468	0.72397	0.6661	0.28473
contig23503	GTR8_HUMANRecName: Full=Solute carrier family 2, facilitated glucose transporter member 8; AltName: Full=Glucose transporter type 8; Short=GLUT-8; AltName: Full=Glucose transporter type X1	1.7156	0.02839	0.74624	0.32534	1.1648	0.43347	0.14195	0.92612	0.29851	0.70063	0.11443	0.8653
contig23555	---NA---	1.488	0.02841	0.63619	0.33401	1.1178	0.34593	-0.082824	0.95776	-0.41074	0.48444	0.16176	0.77601
contig23570	FEM1C_XENLARecName: Full=Protein fem-1 homolog C; Short=FEM1c; AltName: Full=FEM1-gamma	2.2828	0.044694	0.69882	0.56053	0.9084	0.90431	0.72963	0.60262	0.070752	0.96545	-0.41868	0.66
contig23593	---NA---	0.075399	0.95875	1.0042	0.26536	-0.0047606	0.99999	0.94204	0.42177	1.1863	0.15366	1.9987	0.040992
contig23645	---NA---	1.8086	0.027973	0.84673	0.28288	1.0565	0.52896	-0.0043681	0.99857	0.75166	0.25761	1.2773	0.093424
contig23738	---NA---	-0.14573	0.93257	-0.55144	0.60759	0.0025491	0.99999	-2.1453	0.38339	-2.4095	0.12929	-2.316	0.049247
contig23819	---NA---	-4.2703	0.029834	-4.3324	0.045478	-3.1777	0.33946	-0.9465	0.49298	-1.2961	0.18292	-1.0839	0.35607
contig23839	YMDB_SALTIRecName: Full=O-acetyl-ADP-ribose deacetylase; AltName: Full=Regulator of RNase III activity	2.1873	0.038275	1.2012	0.25467	1.2175	0.62678	0.29783	0.87103	-0.5365	0.59027	-0.51172	0.54358
contig23878	SMBT1_RATRecName: Full=Scm-like with four MBT domains protein 1	2.0589	0.043986	0.59821	0.57787	0.51297	0.99999	-0.64414	0.60973	-0.16533	0.90064	-0.44592	0.59424
contig23890	VWA2_MOUSERecName: Full=von Willebrand factor A domain-containing protein 2; AltName: Full=A domain-containing protein matrilin and collagen; Short=AMACO; Flags: Precursor	1.3684	0.071623	0.36607	0.65227	1.0455	0.53007	0.35831	0.74299	0.69932	0.29236	1.9417	0.026179
contig24127	---NA---	1.8138	0.043629	0.83487	0.35851	0.78754	0.83424	0.32934	0.81398	0.69872	0.36782	1.3522	0.10468
contig24162	RDX_DROMERecName: Full=Protein roadkill; AltName: Full=Hh-induced MATH and BTB domain-containing protein	0.00092165	0.99948	1.4886	0.12278	-0.35199	0.99999	1.4199	0.38339	1.7454	0.12951	1.9783	0.047306
contig24256	---NA---	-5.6743	0.016285	-2.4272	0.21878	-4.397	0.15668	2.0811	0.41263	-0.011043	0.99719	2.2524	0.17648
contig24368	---NA---	2.079	0.02226	1.1011	0.19938	1.5544	0.28944	0.11986	0.94923	-0.0027012	0.99853	0.95983	0.18082
contig24414	---NA---	3.1175	0.02226	1.6674	0.17901	1.486	0.58032	-0.079811	0.9806	0.60403	0.64671	0.23409	0.85732
contig24660	---NA---	1.7506	0.029981	1.467	0.093247	1.0705	0.52343	0.42057	0.68303	0.44835	0.53635	0.87471	0.18977
contig24704	---NA---	0.98474	0.17092	0.28548	0.70992	0.30669	0.99999	0.57076	0.52461	0.81094	0.20161	1.6581	0.040992
contig24756	RTJK_DROMERecName: Full=RNA-directed DNA polymerase from mobile element jockey; AltName: Full=Reverse transcriptase	1.9714	0.027973	1.0237	0.23801	1.8399	0.18762	0.079725	0.97067	-0.10996	0.92388	0.78583	0.26128
contig24804	ZNFX1_HUMANRecName: Full=NFX1-type zinc finger-containing protein 1	2.6403	0.037603	1.7188	0.18196	1.3959	0.6665	0.81315	0.59449	0.97133	0.3687	-0.16154	0.8869
contig24884	---NA---	0.93756	0.37243	1.4775	0.13	-0.38902	0.99999	1.0283	0.38339	1.0558	0.16356	2.0846	0.026661
contig24968	---NA---	-4.031	0.029459	-4.1405	0.039963	-3.5204	0.15668	-0.96894	0.48015	-1.3385	0.16739	-0.42164	0.71589
contig25240	---NA---	2.576	0.028478	1.0558	0.35605	0.87289	0.91829	0.28881	0.89141	-0.13963	0.92642	0.038064	0.97155
contig25275	SR140_PONABRecName: Full=U2 snRNP-associated SURP motif-containing protein; AltName: Full=140 kDa Ser/Arg-rich domain protein; AltName: Full=U2-associated protein SR140	-0.59858	0.79397	-0.59778	0.67171	0.091547	0.99999	-2.7608	0.38339	-4.0703	0.046384	-4.0089	0.017359
contig25499	---NA---	2.8539	0.028794	1.8091	0.16403	1.9674	0.41691	0.20584	0.93922	-0.35132	0.80615	0.55474	0.58889
contig25683	---NA---	1.6424	0.040595	1.6816	0.063969	1.6609	0.22178	0.10608	0.95476	-0.12133	0.9082	-0.17627	0.79939
contig25705	---NA---	1.7949	0.049081	0.66213	0.48533	0.53595	0.99999	0.16028	0.93374	0.20534	0.85365	0.36359	0.63401
contig25706	DCNL4_MOUSERecName: Full=DCN1-like protein 4; AltName: Full=DCUN1 domain-containing protein 4; AltName: Full=Defective in cullin neddylation protein 1-like protein 4	2.4571	0.027973	1.3102	0.18196	0.61876	0.99999	-0.075126	0.97424	0.092826	0.94416	1.1246	0.17196
contig25827	---NA---	2.4198	0.035864	0.88977	0.43999	1.7554	0.42916	0.15678	0.95129	-0.4828	0.67131	0.56628	0.53504
contig25835	---NA---	2.0703	0.032004	0.96573	0.30593	1.7633	0.27996	-0.24858	0.8852	-0.6803	0.40558	0.16749	0.8401
contig26000	---NA---	1.2583	0.46663	0.59845	0.71436	0.46846	0.99999	-0.31381	0.92185	-2.6805	0.12951	-4.4246	0.013305
contig26026	---NA---	1.4036	0.11773	0.20799	0.8337	0.31376	0.99999	0.29294	0.85041	2.3902	0.057439	3.8997	0.00016341
contig26273	---NA---	1.6154	0.048926	0.67152	0.42113	0.73793	0.81422	0.1939	0.90318	0.29643	0.73379	0.24389	0.72783
contig26355	LICA2_HAEIFRecName: Full=Protein LicA	2.6088	0.02226	1.5493	0.14628	2.2194	0.18275	0.32992	0.84674	0.80168	0.36613	1.7389	0.087968
contig26420	---NA---	3.4014	0.020432	2.7748	0.059588	1.9662	0.43642	-0.46001	0.84373	-0.025896	0.99086	-7.4888	2.5812e-05
contig26435	---NA---	1.9104	0.040394	0.00046672	0.99966	1.5535	0.45003	0.53078	0.64724	0.47541	0.58585	-0.14383	0.86013
contig26443	---NA---	2.4494	0.02611	1.0917	0.29626	1.3987	0.52971	0.033987	0.99032	-0.46925	0.64822	0.29026	0.74565
contig26515	---NA---	7.0273	0.0068663	-0.82937	0.56276	0.29895	0.99999	-0.92191	0.49811	-0.90978	0.32827	-1.2149	0.221
contig26532	TADBP_PONABRecName: Full=TAR DNA-binding protein 43; Short=TDP-43	2.6221	0.049081	0.33711	0.81035	1.8201	0.52642	-1.1715	0.45581	-0.45441	0.7158	-0.98437	0.31053
contig26823	KC1G1_DANRERecName: Full=Casein kinase I isoform gamma-1; Short=CKI-gamma 1	3.6125	0.017392	3.1079	0.053854	1.37	0.70647	0.29507	0.90821	1.8331	0.13925	-1.5275	0.17372
contig26941	---NA---	1.4309	0.038275	1.2127	0.09848	0.54449	0.9032	0.2919	0.76601	0.58547	0.31262	0.8553	0.15017
contig27123	---NA---	1.5406	0.034099	0.50968	0.48808	0.053004	0.99999	0.073275	0.96712	0.21827	0.78149	0.53898	0.35163
contig27129	---NA---	2.4499	0.029981	2.707	0.053854	0.98696	0.81182	1.2668	0.38832	1.8683	0.12951	-0.25415	0.79015
contig27155	---NA---	1.8674	0.041893	1.0572	0.25335	1.2332	0.52896	0.1954	0.91539	-0.23487	0.82445	0.50375	0.4941
GYUW2K401A0UQ9	---NA---	1.7058	0.046832	1.7342	0.07613	0.066136	0.99999	-0.063221	0.97654	0.31721	0.72685	0.82034	0.24447
GYUW2K401A12D4	---NA---	2.404	0.024196	1.2124	0.2296	1.3023	0.54458	0.047566	0.98562	0.53131	0.57209	0.52508	0.51251
GYUW2K401A23XI	---NA---	1.6872	0.04236	0.75949	0.3656	0.76537	0.7969	-0.31842	0.7996	-0.39847	0.62088	0.11244	0.88053
GYUW2K401A244U	---NA---	1.4883	0.029459	0.53982	0.4202	0.62775	0.7817	0.21519	0.84295	0.11331	0.89381	0.33254	0.53256
GYUW2K401A2B4R	---NA---	2.9475	0.022889	1.2071	0.32048	1.2823	0.69756	0.018045	0.99484	-0.19555	0.90045	-0.069578	0.95073
GYUW2K401A3G1S	---NA---	0.31979	0.6978	0.96838	0.15716	-0.46155	0.97397	0.93859	0.38339	1.2702	0.12951	1.4705	0.040992
GYUW2K401A3LO9	---NA---	1.8375	0.040595	0.78643	0.38531	1.1348	0.56304	0.22286	0.89397	0.21762	0.83606	0.8586	0.24133
GYUW2K401A3QDL	---NA---	2.4892	0.034931	1.3823	0.23835	1.7121	0.45993	0.58319	0.709	-0.30239	0.82111	0.8567	0.36127
GYUW2K401A3VJC	---NA---	1.252	0.038275	0.76873	0.20876	0.89642	0.45824	0.31703	0.68817	0.32706	0.55861	0.73289	0.15938
GYUW2K401A3Y33	TITIN_DROMERecName: Full=Titin; AltName: Full=D-Titin; AltName: Full=Kettin	3.088	0.044049	0.92575	0.56685	1.4677	0.77893	-0.27383	0.93231	-0.34898	0.84969	-0.36955	0.78221
GYUW2K401A4R40	---NA---	-0.37843	0.76905	-0.92655	0.31539	0.5739	0.99999	-1.5641	0.38339	-0.90651	0.29721	-2.4965	0.031152
GYUW2K401A533X	---NA---	1.8634	0.027892	1.2804	0.12973	1.419	0.33789	-0.16683	0.91855	-0.43539	0.56609	0.5413	0.40436
GYUW2K401A5D5K	---NA---	1.9103	0.040595	2.0733	0.05464	1.0384	0.66472	0.31922	0.83114	0.26767	0.79877	0.70371	0.35098
GYUW2K401A5J0O	---NA---	1.5119	0.03712	0.26558	0.71962	0.62303	0.83712	-0.15453	0.91387	-0.090049	0.9248	0.7335	0.2158
GYUW2K401A6RUE	---NA---	2.2209	0.025942	1.9167	0.072933	2.1783	0.15668	0.17067	0.93037	0.60958	0.46868	-1.063	0.18653
GYUW2K401A7071	---NA---	2.2346	0.03712	0.96845	0.3634	1.1874	0.66056	0.007309	0.99833	-0.42043	0.69912	-0.15628	0.86874
GYUW2K401A7VMY	---NA---	1.8609	0.036687	1.5867	0.096078	2.288	0.1111	0.35721	0.78088	0.10701	0.9271	0.84882	0.23652
GYUW2K401A8JX2	---NA---	2.7003	0.025942	1.1364	0.32233	1.2761	0.66232	0.28822	0.89255	0.043643	0.98104	0.095198	0.92742
GYUW2K401A9B2G	GLPK_HUMANRecName: Full=Glycerol kinase; Short=GK; Short=Glycerokinase; AltName: Full=ATP:glycerol 3-phosphotransferase	3.0278	0.040952	3.2574	0.057941	0.27287	0.99999	-0.33259	0.90654	1.3455	0.2765	-1.1749	0.3193
GYUW2K401A9C8N	---NA---	4.2807	0.040394	3.506	0.10907	1.8505	0.81423	0.5269	0.89141	2.5463	0.17256	-2.0742	0.2228
GYUW2K401A9G12	---NA---	2.2858	0.038275	0.8821	0.42585	1.2565	0.64829	0.54767	0.70992	0.98514	0.28691	1.1819	0.19662
GYUW2K401AF1CY	---NA---	1.8375	0.049081	1.2607	0.19338	1.4674	0.42648	0.12205	0.95652	0.6198	0.46085	-0.56841	0.45343
GYUW2K401AFNUI	---NA---	2.6508	0.032004	0.47064	0.70643	1.2331	0.72198	-0.044386	0.98861	0.31253	0.82169	-0.36458	0.72045
GYUW2K401AGSKX	---NA---	2.4714	0.033134	1.7968	0.12879	0.51582	0.99999	0.79685	0.55895	0.30392	0.81332	0.19229	0.84778
GYUW2K401AHUTC	DDC_RATRecName: Full=Aromatic-L-amino-acid decarboxylase; Short=AADC; AltName: Full=DOPA decarboxylase; Short=DDC	0.85372	0.2011	0.51598	0.45713	0.024322	0.99999	0.63446	0.47827	0.33893	0.60429	1.5609	0.035578
GYUW2K401AIXQ8	CLIP4_RATRecName: Full=CAP-Gly domain-containing linker protein 4; AltName: Full=Restin-like protein 2	2.2496	0.025942	1.0915	0.25566	1.992	0.21875	-0.12224	0.95674	-0.49234	0.58691	0.75149	0.32889
GYUW2K401AJL34	---NA---	1.5988	0.04659	1.106	0.18274	1.2127	0.45767	0.36902	0.74357	-0.041384	0.9719	1.0374	0.14262
GYUW2K401AKPKW	---NA---	1.3441	0.12945	1.6891	0.095607	0.12075	0.99999	1.0613	0.38939	1.675	0.12951	2.0936	0.038199
GYUW2K401AL943	---NA---	2.4616	0.042547	0.94666	0.44442	0.97113	0.9032	0.18124	0.94676	-0.1725	0.91439	-0.20793	0.84658
GYUW2K401ANRHD	CTR2_CANFARecName: Full=Chymotrypsinogen 2; Contains: RecName: Full=Chymotrypsin 2 chain A; Contains: RecName: Full=Chymotrypsin 2 chain B; Contains: RecName: Full=Chymotrypsin 2 chain C; Flags: Precursor	1.6776	0.1413	1.2831	0.28142	1.0013	0.86113	0.43605	0.81217	1.1019	0.27262	3.1742	0.016528
GYUW2K401AO5ZN	ITBX_DROMERecName: Full=Integrin beta-PS; AltName: Full=Position-specific antigen beta subunit; AltName: Full=Protein myospheroid; AltName: Full=Protein olfactory C; Flags: Precursor	0.6229	0.46534	1.3599	0.10174	0.4958	0.99999	1.0015	0.38339	1.1237	0.1349	1.6706	0.048467
GYUW2K401APU7Q	---NA---	0.82078	0.27089	0.75552	0.31209	1.01	0.52642	0.21018	0.87294	1.0996	0.13253	2.1529	0.011148
GYUW2K401AQ1MC	---NA---	1.6006	0.030806	1.1089	0.13921	1.1548	0.403	-0.0028752	0.99869	-0.040031	0.96925	0.52774	0.36526
GYUW2K401AQ2QO	CHK2_MOUSERecName: Full=Serine/threonine-protein kinase Chk2; AltName: Full=CHK2 checkpoint homolog; AltName: Full=Checkpoint kinase 2	2.51	0.040595	2.6835	0.057941	1.3223	0.68316	0.34392	0.89176	0.13348	0.94304	0.46945	0.67782
GYUW2K401AR139	---NA---	1.5672	0.047612	1.4332	0.096078	0.81997	0.71873	0.065009	0.97372	0.047177	0.96693	0.79377	0.22458
GYUW2K401ARZJI	SMAG2_HUMANRecName: Full=Protein Smaug homolog 2; Short=Smaug 2; Short=hSmaug2; AltName: Full=Sterile alpha motif domain-containing protein 4B; Short=SAM domain-containing protein 4B	2.2213	0.017392	0.9242	0.25215	1.0123	0.56304	-0.30531	0.80068	-0.13312	0.89704	-0.22232	0.7459
GYUW2K401AS7OS	---NA---	1.0664	0.22399	0.30742	0.73775	-0.22986	0.99999	0.57818	0.59313	1.0546	0.18022	1.9068	0.048467
GYUW2K401ASLMD	---NA---	1.7944	0.031384	1.3033	0.1249	1.3188	0.39011	0.39508	0.72096	0.32101	0.70093	0.72518	0.27104
GYUW2K401ASMG7	---NA---	2.0027	0.044694	2.4124	0.053854	1.544	0.43781	-0.10975	0.96509	-0.23229	0.84593	-0.75881	0.35151
GYUW2K401ASZIU	---NA---	1.4577	0.044002	0.95956	0.19708	1.2761	0.33789	-0.21833	0.86125	-0.72746	0.23773	0.060279	0.9278
GYUW2K401AT17V	---NA---	2.1689	0.034923	1.4557	0.16335	1.9774	0.2598	0.1974	0.92297	-0.039722	0.98006	1.1973	0.17006
GYUW2K401ATQ9B	RABE1_RATRecName: Full=Rab GTPase-binding effector protein 1; AltName: Full=Rabaptin-5; AltName: Full=Rabaptin-5alpha	2.4437	0.02226	1.2621	0.21287	1.8215	0.2938	0.23607	0.90131	-0.16509	0.89715	0.54264	0.49621
GYUW2K401ATSUD	ACON_YEASTRecName: Full=Aconitate hydratase, mitochondrial; Short=Aconitase; AltName: Full=Citrate hydro-lyase; Flags: Precursor	2.5535	0.025191	1.6538	0.13757	2.3718	0.17475	-0.21608	0.92031	-0.40213	0.71849	1.1599	0.19549
GYUW2K401AUKMG	---NA---	2.7822	0.049081	0.60071	0.68326	1.6831	0.61565	-0.78022	0.67346	-1.1937	0.32612	-0.6329	0.58583
GYUW2K401AVP7X	---NA---	2.8303	0.033336	1.0844	0.40931	1.6588	0.55747	-0.014468	0.99603	-0.3504	0.81229	-0.11585	0.92211
GYUW2K401AW6EU	---NA---	1.2956	0.16878	-0.13281	0.90267	-0.19166	0.99999	-0.21409	0.911	0.47296	0.61291	2.398	0.026246
GYUW2K401AWI52	ITPR1_BOVINRecName: Full=Inositol 1,4,5-trisphosphate receptor type 1; AltName: Full=IP3 receptor isoform 1; Short=IP3R 1; Short=InsP3R1; AltName: Full=Type 1 inositol 1,4,5-trisphosphate receptor; Short=Type 1 InsP3 receptor	2.5521	0.042561	0.65512	0.61762	1.2438	0.75148	0.074369	0.98094	-0.20101	0.90206	-0.85874	0.39733
GYUW2K401B05LD	---NA---	2.6188	0.032595	1.102	0.3604	1.0703	0.812	-0.15458	0.95626	-0.53729	0.64753	-0.91165	0.34533
GYUW2K401B0MKZ	---NA---	1.6442	0.049081	0.28519	0.74442	0.69708	0.88237	-0.29304	0.82926	-0.33353	0.70206	-0.55213	0.41649
GYUW2K401B21WJ	---NA---	1.9256	0.036337	1.6031	0.099799	1.5674	0.33946	0.40016	0.75562	0.34628	0.71306	1.378	0.10249
GYUW2K401B2ARK	---NA---	1.6484	0.024521	1.2986	0.09187	1.1097	0.39374	0.24099	0.82478	0.32299	0.62923	0.84026	0.15945
GYUW2K401B2AZG	---NA---	0.2042	0.86147	0.22608	0.80847	-0.35332	0.99999	0.05511	0.98025	1.1322	0.16346	2.1967	0.026389
GYUW2K401B2PFM	---NA---	1.6533	0.049081	0.94788	0.26756	1.1405	0.52971	-0.14467	0.93581	-0.27418	0.76592	0.52856	0.4377
GYUW2K401B2VN8	---NA---	1.5042	0.047661	0.72596	0.34764	1.0221	0.52971	-0.041237	0.98366	0.2771	0.73132	0.54088	0.37951
GYUW2K401B3BSC	---NA---	2.1233	0.03712	1.08	0.28313	0.74154	0.94263	0.5266	0.69144	0.28785	0.79913	0.64504	0.42229
GYUW2K401B3IPN	---NA---	1.8736	0.02226	1.1152	0.13935	0.95746	0.53728	-0.12739	0.93321	-0.11944	0.89859	0.54383	0.35503
GYUW2K401B71ZG	---NA---	2.6753	0.044662	3.1347	0.053854	1.4245	0.69457	0.15889	0.96566	0.31686	0.8611	-4.0327	0.016528
GYUW2K401B7AA3	---NA---	1.4607	0.03712	0.67083	0.33546	1.0588	0.44007	0.1827	0.88527	-0.001105	0.99917	0.92686	0.12973
GYUW2K401B9VZ8	---NA---	0.51002	0.52475	0.79437	0.26464	-0.2412	0.99999	1.0008	0.38339	1.1808	0.12951	1.506	0.049809
GYUW2K401BBQGD	---NA---	-1.901	0.12472	-3.4679	0.046734	-2.5936	0.29407	0.1918	0.93653	-0.56456	0.60569	-0.7981	0.43345
GYUW2K401BBWQS	---NA---	2.396	0.040595	0.81867	0.49429	1.2622	0.68429	-0.30089	0.88862	-0.38969	0.7553	0.0080075	0.99412
GYUW2K401BCC59	NS1BP_HUMANRecName: Full=Influenza virus NS1A-binding protein; Short=NS1-BP; Short=NS1-binding protein; AltName: Full=Aryl hydrocarbon receptor-associated protein 3; AltName: Full=Kelch-like protein 39	2.4113	0.049081	0.90747	0.4746	1.0307	0.87266	0.07489	0.98041	-0.12985	0.93851	1.3452	0.19532
GYUW2K401BCJ1P	---NA---	0.07883	0.96737	0.16395	0.8875	-0.67496	0.99999	0.83947	0.51277	2.3235	0.12951	2.3356	0.044503
GYUW2K401BE0GF	---NA---	2.0553	0.027973	1.4361	0.12667	0.78895	0.82829	0.76178	0.49728	0.45327	0.59881	0.57652	0.42286
GYUW2K401BE3ZA	---NA---	2.0595	0.027973	1.2956	0.16403	1.2276	0.5241	0.24387	0.88063	0.45513	0.59877	1.6416	0.078128
GYUW2K401BFWG3	---NA---	0.53428	0.73958	1.7595	0.18042	-0.77877	0.99999	2.0149	0.38339	2.5596	0.12951	3.143	0.02647
GYUW2K401BHZM6	---NA---	3.1687	0.04896	2.9079	0.096078	1.7793	0.6665	-0.61836	0.79558	-0.57482	0.73296	-4.2804	0.01972
GYUW2K401BIA6O	---NA---	1.2835	0.1644	0.68407	0.48524	1.2609	0.53345	0.8908	0.47749	1.1769	0.17184	2.132	0.040992
GYUW2K401BILC8	---NA---	1.6009	0.029494	0.011733	0.98961	0.79238	0.6665	-0.2818	0.79041	-0.28346	0.69912	0.32429	0.57606
GYUW2K401BJG34	---NA---	1.7999	0.025942	0.78224	0.30466	1.2609	0.37913	-0.38906	0.70142	-0.32334	0.6715	0.31069	0.61859
GYUW2K401BJM43	---NA---	1.2612	0.038275	1.3295	0.057746	0.88229	0.4641	0.32362	0.68192	0.55763	0.27474	0.68908	0.18167
GYUW2K401BL6KP	---NA---	1.336	0.040394	0.89337	0.17893	0.66883	0.71601	0.074188	0.96252	0.065313	0.94128	0.8805	0.12695
GYUW2K401BLU4J	---NA---	1.9069	0.02226	1.0039	0.20006	1.1638	0.44228	0.15835	0.91855	-0.026649	0.98273	0.34156	0.58461
GYUW2K401BLZJ1	TEP1_HUMANRecName: Full=Telomerase protein component 1; AltName: Full=Telomerase-associated protein 1; Short=Telomerase protein 1; AltName: Full=p240; AltName: Full=p80 telomerase homolog	2.1063	0.034923	0.11029	0.91878	1.4973	0.67407	0.036951	0.98961	0.29161	0.80969	-0.79135	0.36005
GYUW2K401BM8Y7	---NA---	2.2219	0.024429	2.6722	0.028111	0.94744	0.71608	1.2134	0.38339	1.4619	0.12951	1.123	0.12599
GYUW2K401BMYHZ	---NA---	1.7219	0.04366	1.697	0.0775	0.93549	0.68192	0.64386	0.53252	0.64459	0.38392	1.0741	0.15013
GYUW2K401BNAP6	ENTP1_RATRecName: Full=Ectonucleoside triphosphate diphosphohydrolase 1; Short=NTPDase 1; AltName: Full=Ecto-ATP diphosphohydrolase 1; Short=Ecto-ATPDase 1; Short=Ecto-ATPase 1; AltName: Full=Ecto-apyrase; AltName: Full=Lymphoid cell activation antigen; AltName: CD_antigen=CD39	1.1095	0.10938	0.90397	0.21442	0.79439	0.6665	0.34222	0.7272	0.40551	0.53994	1.5935	0.040992
GYUW2K401BP0IU	---NA---	-2.8529	0.10266	-4.1053	0.052048	-3.5826	0.2598	-2.7278	0.32775	-2.898	0.12173	-3.2916	0.029981
GYUW2K401BPV8P	SYS1_NEMVERecName: Full=Protein SYS1 homolog	-4.8617	0.02226	-4.7817	0.028111	-4.4265	0.15668	-0.97235	0.46623	-0.92478	0.28113	-1.0418	0.36441
GYUW2K401BQME8	---NA---	2.4766	0.017392	0.5679	0.54033	1.6127	0.30118	-0.25743	0.86777	-0.47485	0.56967	-0.4183	0.56031
GYUW2K401BQXPI	---NA---	1.1009	0.1384	0.40199	0.61674	0.077214	0.99999	0.63441	0.50471	0.86606	0.19484	1.8057	0.032213
GYUW2K401BRDKA	---NA---	1.7367	0.040595	-0.2289	0.79569	1.4594	0.33946	-0.91897	0.40894	-0.32019	0.71511	0.27227	0.70108
GYUW2K401BRO40	---NA---	3.3408	0.033926	2.6714	0.084407	1.8913	0.57743	1.6892	0.38339	1.1367	0.32763	2.1768	0.096664
GYUW2K401BRVVI	SNX14_DANRERecName: Full=Sorting nexin-14	1.8323	0.030806	0.8647	0.29616	0.88214	0.69391	0.15723	0.92481	-0.23974	0.79637	-0.1737	0.80983
GYUW2K401BUUS0	---NA---	1.473	0.02226	1.1837	0.069071	0.7437	0.55043	0.22712	0.79172	0.55615	0.25363	0.65981	0.18142
GYUW2K401BV4KM	---NA---	2.5927	0.0086107	1.0062	0.21911	1.203	0.45993	-0.47581	0.63819	0.0083354	0.99507	-0.37687	0.56388
GYUW2K401BW3DG	---NA---	1.817	0.022889	1.1226	0.14512	0.956	0.55148	0.31253	0.77183	0.11793	0.90268	0.44	0.46099
GYUW2K401BWWME	---NA---	0.85534	0.51337	0.74918	0.53691	-0.73346	0.99999	0.55911	0.72511	1.1598	0.23906	2.5391	0.044726
GYUW2K401BX6SM	---NA---	1.3339	0.039573	0.7359	0.25566	0.79605	0.57741	-0.26047	0.78144	-0.16869	0.8188	0.29404	0.57316
GYUW2K401BZF1J	---NA---	3.018	0.041172	2.959	0.07613	1.3797	0.7898	1.3077	0.48873	1.2993	0.30012	-0.13651	0.9192
GYUW2K401BZW6O	---NA---	0.95172	0.2086	2.2654	0.028111	0.63976	0.93378	-0.048076	0.98223	0.71407	0.32888	0.74626	0.283
GYUW2K401C1N7A	---NA---	2.5177	0.044059	2.1321	0.10899	2.3569	0.27996	0.57873	0.74117	0.7938	0.48115	-0.67395	0.50436
GYUW2K401C25ZD	---NA---	-1.2951	0.28836	-1.3686	0.13463	-0.027094	0.99999	-2.9434	0.085583	-3.4439	0.016707	-3.1841	0.035312
GYUW2K401C6KA3	---NA---	3.0169	0.041893	2.7048	0.095607	0.52484	0.99999	1.6218	0.38339	1.785	0.14778	-1.1622	0.27669
GYUW2K401C85EZ	---NA---	2.8008	0.027892	1.2602	0.3009	1.724	0.48143	0.022195	0.9943	-0.24644	0.86915	0.71761	0.46172
GYUW2K401CA3EV	---NA---	-0.26335	0.91662	0.46636	0.79795	-2.0414	0.61926	1.9668	0.39464	3.3895	0.12951	4.2718	0.026591
GYUW2K401CAZHO	---NA---	-0.54988	0.55227	-1.1674	0.16586	-0.92154	0.72896	-1.683	0.38339	-1.7144	0.12951	-2.0054	0.045399
GYUW2K401CB9TT	---NA---	1.3717	0.03712	1.3906	0.061037	0.28469	0.99999	0.40514	0.61367	0.85807	0.1539	1.1686	0.08056
GYUW2K401CCAG6	---NA---	3.2862	0.028794	0.94239	0.53244	1.3551	0.78971	-0.11028	0.97544	0.030721	0.98984	0.080068	0.95281
GYUW2K401CCCL9	PI4KB_SORARRecName: Full=Phosphatidylinositol 4-kinase beta; Short=PI4K-beta; Short=PI4Kbeta; Short=PtdIns 4-kinase beta	2.7875	0.022947	1.0117	0.38212	1.4717	0.55148	-0.0035463	0.99901	0.18137	0.90288	-0.33766	0.7285
GYUW2K401CCEID	---NA---	3.7548	0.042547	1.1474	0.55443	1.7095	0.79645	-0.36834	0.92172	-0.55157	0.78877	-0.25816	0.87684
GYUW2K401CCJMW	---NA---	2.3254	0.049081	2.1226	0.09848	-0.19629	0.99999	1.1693	0.45381	1.2372	0.2224	-0.8627	0.3695
GYUW2K401CCQ3M	---NA---	1.948	0.014997	0.76904	0.24112	1.1655	0.31446	-0.15012	0.90569	0.028946	0.9766	0.13739	0.80915
GYUW2K401CD8Q2	---NA---	-1.0857	0.50338	-1.8447	0.17349	-0.30644	0.99999	-3.6901	0.20303	-3.9379	0.056725	-3.6984	0.027651
GYUW2K401CDSYZ	---NA---	3.1662	0.01847	2.09	0.09707	1.2166	0.71286	1.1642	0.44539	-0.12581	0.9368	-1.6837	0.11337
GYUW2K401CECEA	---NA---	2.9346	0.02226	1.3174	0.26152	2.0378	0.33946	-0.42872	0.81252	-0.11847	0.9409	0.43068	0.65667
GYUW2K401CF7FZ	---NA---	2.2677	0.033127	0.9728	0.35275	0.30742	0.99999	0.78797	0.52891	0.34796	0.75491	0.6953	0.40357
GYUW2K401CFXKI	ELF1_SCHPORecName: Full=mRNA export factor elf1	-0.13479	0.94596	-0.04717	0.97472	2.1447	0.37165	-1.2667	0.44821	-1.1616	0.28254	3.3273	0.020358
GYUW2K401CGCEN	---NA---	2.5349	0.040822	0.65957	0.60883	1.2918	0.71206	0.0053315	0.99869	0.034385	0.98699	0.29733	0.78192
GYUW2K401CGSGS	---NA---	0.44523	0.54668	0.27205	0.68522	0.20564	0.99999	0.54292	0.50171	0.6629	0.22902	1.4598	0.040421
GYUW2K401CGXLM	---NA---	0.2176	0.8576	0.85476	0.36116	0.0047974	0.99999	0.85029	0.48371	1.3784	0.13186	2.1918	0.031152
GYUW2K401CH1LJ	---NA---	2.7771	0.02226	0.76045	0.50732	1.6256	0.46008	-0.074171	0.97881	-0.43454	0.70336	0.11838	0.90598
GYUW2K401CIN12	---NA---	3.2283	0.034469	1.233	0.41639	1.7563	0.62166	0.29932	0.921	0.3635	0.83654	-0.63472	0.60544
GYUW2K401CJPY4	---NA---	2.4896	0.016285	1.8251	0.060051	2.0157	0.15668	0.3566	0.77183	0.37636	0.65371	0.85222	0.22208
GYUW2K401CKHLN	---NA---	1.9352	0.02226	0.62878	0.4112	0.89773	0.61225	-0.11306	0.94633	0.035816	0.97471	0.27721	0.65894
GYUW2K401CLOKO	---NA---	1.7406	0.18852	2.0959	0.13827	-0.22764	0.99999	-0.071183	0.98568	2.889	0.12951	6.2105	0.00026112
GYUW2K401CMEDJ	---NA---	1.0919	0.35054	2.3468	0.068593	0.45541	0.99999	1.724	0.38339	1.6764	0.12951	2.6213	0.021087
GYUW2K401CN2PQ	---NA---	2.1792	0.02226	1.4966	0.10106	1.2711	0.45993	0.45809	0.68291	0.36896	0.66643	1.2333	0.11353
GYUW2K401CN8Q4	---NA---	1.4599	0.046916	0.64793	0.3858	0.8502	0.64829	-0.041476	0.98223	-0.06335	0.95207	0.84058	0.18358
GYUW2K401CNOGR	RS23_CANGARecName: Full=40S ribosomal protein S23 [	5.0948	0.020432	-0.58018	0.65758	0.97969	0.99999	-0.05427	0.98754	-1.3064	0.23162	-1.2826	0.26204
GYUW2K401CO7QO	KINH_DROMERecName: Full=Kinesin heavy chain	1.5578	0.040595	0.73837	0.33453	0.46137	0.99999	0.148	0.92317	0.42302	0.54851	0.015516	0.98262
GYUW2K401COA9B	---NA---	0.84588	0.36126	1.6169	0.096078	-0.33987	0.99999	1.582	0.38339	1.5366	0.12951	2.1774	0.027622
GYUW2K401CP1D5	---NA---	2.2741	0.043295	2.1936	0.084202	2.635	0.15668	0.53874	0.72765	0.038212	0.98341	1.072	0.24429
GYUW2K401CQLV1	---NA---	2.2792	0.040595	0.66412	0.56799	1.997	0.31446	0.064003	0.98157	-0.21967	0.87295	0.82684	0.35703
GYUW2K401CQM20	---NA---	0.47394	0.50561	0.35114	0.59706	0.13889	0.99999	0.52087	0.50529	0.54022	0.31847	1.4264	0.040421
GYUW2K401CQV3D	---NA---	2.4913	0.033301	2.119	0.094074	1.791	0.41212	0.52526	0.7415	0.38878	0.75078	1.1423	0.22334
GYUW2K401CR5IK	---NA---	-5.2903	0.043999	-4.7115	0.059588	-3.7442	0.45993	0.3264	0.9178	0.68125	0.66451	0.16617	0.90658
GYUW2K401CSSH0	---NA---	1.3108	0.38111	2.3234	0.12289	1.2587	0.82901	2.0482	0.38339	1.6553	0.18534	3.13	0.044726
GYUW2K401CSVQM	---NA---	-0.13529	0.93416	1.0463	0.32588	-0.93847	0.82207	1.3507	0.38339	2.2422	0.12951	2.357	0.040992
GYUW2K401CT70I	---NA---	2.321	0.029516	0.95686	0.36039	1.3765	0.53007	-0.03525	0.98961	-0.26101	0.82839	0.14738	0.87441
GYUW2K401CT82D	---NA---	2.1004	0.040595	1.6951	0.11543	0.82143	0.90157	0.7872	0.52461	0.90801	0.2955	1.5014	0.10915
GYUW2K401CTGZE	---NA---	1.3763	0.11515	2.6102	0.028111	0.45805	0.99999	0.70949	0.51511	1.4407	0.12951	1.0616	0.17102
GYUW2K401CTNP3	---NA---	2.4583	0.043835	1.5088	0.22248	1.324	0.68464	0.34445	0.87294	0.67832	0.5505	0.51144	0.60982
GYUW2K401CV2DG	---NA---	0.94387	0.24851	0.32332	0.70491	0.2778	0.99999	0.1862	0.9078	1.1815	0.13503	1.9225	0.032334
GYUW2K401CVB5G	PAK1_RATRecName: Full=Serine/threonine-protein kinase PAK 1; AltName: Full=Alpha-PAK; AltName: Full=Protein kinase MUK2; AltName: Full=p21-activated kinase 1; Short=PAK-1; AltName: Full=p68-PAK	1.4516	0.04896	0.88439	0.23801	0.32269	0.99999	0.54536	0.54087	0.59915	0.34576	-0.78056	0.20574
GYUW2K401CVLNP	METK1_HUMANRecName: Full=S-adenosylmethionine synthase isoform type-1; Short=AdoMet synthase 1; AltName: Full=Methionine adenosyltransferase 1; Short=MAT 1; AltName: Full=Methionine adenosyltransferase I/III; Short=MAT-I/III	3.2358	0.022067	2.9668	0.053854	1.3917	0.84217	0.81229	0.53077	0.94028	0.30365	0.20818	0.82522
GYUW2K401CVSPG	---NA---	0.33366	0.74432	0.78561	0.33622	0.14313	0.99999	1.1961	0.38339	1.192	0.13266	1.9596	0.029245
GYUW2K401CW0XM	---NA---	1.4297	0.038751	0.81998	0.23655	0.91123	0.53007	-0.077484	0.96363	0.04937	0.95998	0.52022	0.34928
GYUW2K401CXF8B	---NA---	3.7206	0.0013684	1.7335	0.080359	2.2549	0.12457	-0.34067	0.79732	-0.37376	0.67466	-0.010233	0.99033
GYUW2K401CXIGT	---NA---	-0.65594	0.65008	-0.004008	0.99804	-1.6236	0.52654	1.3069	0.38339	1.8089	0.12951	2.4051	0.040992
GYUW2K401CZ1U2	RHG26_CHICKRecName: Full=Rho GTPase-activating protein 26; AltName: Full=GTPase regulator associated with focal adhesion kinase; AltName: Full=Rho-type GTPase-activating protein 26	2.0677	0.046949	1.3575	0.20479	0.90665	0.84017	0.72289	0.56808	0.7855	0.3866	0.4141	0.63237
GYUW2K401CZLIT	---NA---	2.6465	0.038295	1.3983	0.27186	1.2379	0.75883	0.62204	0.71738	0.49596	0.70414	0.9089	0.37296
GYUW2K401D03Q6	---NA---	0.43017	0.54673	0.16303	0.80431	0.56226	0.81346	0.18127	0.86846	0.60187	0.25607	1.3471	0.048408
GYUW2K401D29JR	---NA---	7.3067	0.003412	0.95182	0.48746	-0.01669	0.99999	-0.072013	0.97517	-0.51146	0.56036	-0.9538	0.22269
GYUW2K401D2AXV	---NA---	1.9709	0.029494	1.4668	0.1129	1.4358	0.3882	0.1908	0.91308	-0.089548	0.94078	0.62963	0.37313
GYUW2K401D2G58	---NA---	1.1764	0.12749	2.2856	0.028111	0.18042	0.99999	0.087396	0.96509	0.90841	0.19225	0.16392	0.81587
GYUW2K401D32NM	---NA---	0.26051	0.88048	-0.59715	0.62602	0.083878	0.99999	-2.5109	0.38339	-2.8722	0.12576	-2.6676	0.048467
GYUW2K401D332Z	---NA---	1.6689	0.02226	0.84624	0.21919	1.2651	0.2845	0.037007	0.98331	-0.23742	0.74219	0.64091	0.24719
GYUW2K401D4OT8	---NA---	2.2314	0.029494	1.0525	0.29126	1.6834	0.3608	-0.40051	0.78465	-0.48636	0.61196	-0.15883	0.85731
GYUW2K401D4RKM	ZNFX1_MOUSERecName: Full=NFX1-type zinc finger-containing protein 1	2.7835	0.02226	0.6156	0.60041	1.5165	0.52744	-0.70806	0.6089	-0.75167	0.45085	-0.66226	0.46336
GYUW2K401D8YKJ	MTX2_PIGRecName: Full=Metaxin-2; AltName: Full=Mitochondrial outer membrane import complex protein 2	2.3882	0.016719	1.4617	0.10167	1.7456	0.22178	0.2553	0.85831	0.21636	0.82294	0.77371	0.25735
GYUW2K401DA1FI	---NA---	1.641	0.044691	1.1032	0.19106	1.6774	0.23008	-0.037622	0.98644	-0.21839	0.81653	0.83546	0.21945
GYUW2K401DCAO0	PP1G_BOVINRecName: Full=Serine/threonine-protein phosphatase PP1-gamma catalytic subunit; Short=PP-1G; AltName: Full=Protein phosphatase 1C catalytic subunit	0.65368	0.56223	1.1128	0.26137	-0.028736	0.99999	1.5771	0.38339	1.6911	0.12951	2.5614	0.020574
GYUW2K401DD9KS	---NA---	1.4509	0.044662	0.95127	0.20077	0.41435	0.99999	0.5694	0.51969	0.16865	0.84546	0.01012	0.98832
GYUW2K401DDZXJ	---NA---	1.9399	0.033771	1.0802	0.23332	1.3036	0.46447	0.33352	0.80818	-0.24196	0.81199	0.61278	0.39534
GYUW2K401DE5B3	---NA---	0.39503	0.7133	1.5359	0.09707	-0.64396	0.93078	1.2131	0.38339	1.5024	0.12951	1.8325	0.048467
GYUW2K401DEILX	---NA---	2.1673	0.025942	0.94822	0.30576	1.4189	0.43642	0.33278	0.81631	0.11274	0.9271	0.37816	0.61773
GYUW2K401DEO57	---NA---	1.3673	0.043629	1.246	0.095107	1.1276	0.37913	0.26214	0.79718	0.259	0.71415	1.0085	0.10741
GYUW2K401DF1HD	---NA---	1.6334	0.047157	1.3695	0.11546	1.2002	0.46504	0.36285	0.75861	0.27792	0.7551	1.1528	0.12171
GYUW2K401DFW3Q	---NA---	1.5343	0.042547	1.2818	0.10907	0.81127	0.69277	0.78022	0.42976	0.38379	0.59711	0.98645	0.13779
GYUW2K401DGUJH	---NA---	1.9977	0.049081	0.45318	0.66863	0.60529	0.99999	0.15264	0.94673	-0.13164	0.92368	0.58388	0.47772
GYUW2K401DIJ14	---NA---	0.47437	0.70459	1.8136	0.096078	0.35837	0.99999	1.499	0.38339	1.5609	0.12951	2.29	0.038199
GYUW2K401DINS3	GFRAL_HUMANRecName: Full=GDNF family receptor alpha-like; Flags: Precursor	4.2039	0.043295	1.9398	0.21069	0.56213	0.99999	0.24281	0.93002	0.55251	0.68552	0.52338	0.63664
GYUW2K401DJ6I8	---NA---	1.4713	0.040757	0.58447	0.42126	0.83405	0.63471	-0.23438	0.84272	-0.32695	0.64323	0.69048	0.23974
GYUW2K401DLK6K	---NA---	2.2497	0.024521	1.4785	0.13141	1.9448	0.22178	-0.52635	0.66159	-0.12576	0.91997	0.55958	0.45693
GYUW2K401DLQ92	---NA---	1.1388	0.46816	1.8524	0.20603	0.62933	0.99999	2.7501	0.38339	7.2398	6.5732e-05	9.5373	4.6112e-07
GYUW2K401DLXG6	---NA---	4.577	0.036337	1.3373	0.5529	2.6296	0.59028	-0.30219	0.95008	1.4266	0.455	-0.50028	0.78928
GYUW2K401DMC8Q	---NA---	-3.6674	0.035881	-4.3286	0.052048	-3.2722	0.2598	-0.89476	0.52461	-1.2462	0.25238	-1.0158	0.4156
GYUW2K401DMF4J	---NA---	2.4065	0.049081	1.1377	0.3616	1.2956	0.7066	0.39627	0.84652	0.47818	0.70832	0.47961	0.63937
GYUW2K401DNZV7	---NA---	0.21926	0.8401	0.83889	0.32128	0.11044	0.99999	1.299	0.38339	1.2435	0.13253	1.8821	0.040992
GYUW2K401DOBT2	---NA---	1.4374	0.033301	0.057109	0.93961	0.65401	0.74638	-0.47171	0.55229	0.0049406	0.9963	0.46294	0.38265
GYUW2K401DQ3BR	---NA---	3.0773	0.025942	0.95037	0.47902	1.1123	0.85459	-0.3517	0.88175	-0.36123	0.80785	0.27441	0.81013
GYUW2K401DQ8MS	---NA---	2.7129	0.033336	1.0601	0.40043	1.6378	0.53797	0.73705	0.63674	0.77773	0.48839	0.7254	0.46846
GYUW2K401DQCGY	DSK1_SCHPORecName: Full=Protein kinase dsk1; AltName: Full=Dis1-suppressing protein kinase	4.2163	0.02226	-0.29194	0.80672	-0.37632	0.99999	-1.2546	0.41145	-1.5266	0.15683	-1.4428	0.15621
GYUW2K401DQJN8	---NA---	1.9797	0.037603	1.1137	0.24059	0.8083	0.84521	0.36953	0.79196	0.56355	0.51013	0.90214	0.24071
GYUW2K401DR4A9	---NA---	0.57317	0.62916	1.4504	0.15962	1.09	0.75629	1.5386	0.38339	1.5117	0.12951	2.1711	0.045898
GYUW2K401DRT5R	---NA---	1.5042	0.10982	1.2608	0.20388	1.6654	0.34479	0.71706	0.53965	0.79902	0.33536	2.4216	0.025179
GYUW2K401DRZD3	---NA---	1.872	0.036748	0.98854	0.26516	1.0489	0.60969	-0.2797	0.849	-0.33234	0.71827	0.3996	0.57789
GYUW2K401DSDII	---NA---	2.6305	0.03712	0.60241	0.64026	1.0434	0.866	-0.7106	0.65447	-0.3086	0.8318	-0.41241	0.69268
GYUW2K401DSMIQ	---NA---	1.7629	0.034931	1.663	0.074166	1.1379	0.50065	0.70404	0.49648	0.48292	0.52065	1.1026	0.12971
GYUW2K401DSMRC	---NA---	0.87523	0.29826	0.94665	0.25956	-0.19352	0.99999	1.2281	0.38339	1.2572	0.12951	1.7447	0.034896
GYUW2K401DTP6Y	---NA---	1.9393	0.028255	1.196	0.17269	1.3394	0.4084	0.013213	0.9947	-0.05945	0.96084	0.74129	0.28258
GYUW2K401DU9D7	E74EA_DROMERecName: Full=Ecdysone-induced protein 74EF isoform A; AltName: Full=ETS-related protein E74A	0.13184	0.92374	1.4643	0.13368	0.87093	0.7898	0.58153	0.61456	1.5831	0.12951	2.2601	0.029245
GYUW2K401DU9LW	---NA---	2.0314	0.038275	0.99005	0.30922	0.86964	0.81252	-0.56186	0.64673	-0.3725	0.71106	-0.87657	0.26647
GYUW2K401DUHON	---NA---	-0.063395	0.96405	0.044968	0.96352	-0.077896	0.99999	0.59859	0.56456	1.0496	0.17516	2.1725	0.023386
GYUW2K401DWBZS	---NA---	1.8746	0.03712	1.3447	0.14395	1.2838	0.46504	0.56528	0.60261	0.22898	0.82294	0.73389	0.30728
GYUW2K401DX7GG	---NA---	2.2698	0.0086107	1.4365	0.070703	1.6141	0.15668	-0.020064	0.99199	-0.12816	0.89855	-0.1667	0.80643
GYUW2K401DXKBL	---NA---	1.3424	0.20546	2.8262	0.046734	0.64011	0.99999	0.60324	0.66324	0.83608	0.36756	0.88035	0.3125
GYUW2K401DY7L2	---NA---	0.81533	0.43014	0.98365	0.30959	-0.51103	0.99999	2.1314	0.32775	1.7128	0.12951	2.2385	0.033003
GYUW2K401DYZ9R	SCNA_DROMERecName: Full=Sodium channel protein para; AltName: Full=Protein paralytic; AltName: Full=Sodium channel 1; Short=DmNav1	2.4853	0.027787	1.1773	0.27575	0.91245	0.85657	0.53244	0.7151	0.55805	0.58536	1.2201	0.18435
GYUW2K401DZ44E	---NA---	-0.57797	0.76671	-0.54918	0.64593	5.0124	0.055702	-2.4639	0.38339	-2.8183	0.12576	-2.7043	0.044726
GYUW2K401DZCFP	---NA---	1.5448	0.027973	0.68	0.31529	0.61897	0.79865	0.10523	0.94378	0.25122	0.72202	0.61032	0.26587
GYUW2K401E0409	---NA---	1.4512	0.1107	1.2544	0.19395	0.26687	0.99999	0.73189	0.5219	1.2815	0.14536	2.1955	0.032358
GYUW2K401EA26P	---NA---	1.7319	0.041001	1.0435	0.22274	1.0092	0.60947	0.42263	0.71218	0.32986	0.70571	0.87545	0.21235
GYUW2K401EABPB	TDRD1_HUMANRecName: Full=Tudor domain-containing protein 1; AltName: Full=Cancer/testis antigen 41.1; Short=CT41.1	3.2605	0.023477	1.2567	0.35522	2.0045	0.45993	0.097542	0.9769	-0.33893	0.82846	-0.71569	0.50762
GYUW2K401EBQ01	ARSB_HUMANRecName: Full=Arylsulfatase B; Short=ASB; AltName: Full=N-acetylgalactosamine-4-sulfatase; Short=G4S; Flags: Precursor	0.029855	0.98949	0.726	0.62486	-0.32664	0.99999	2.0273	0.38339	1.739	0.12951	2.3292	0.040992
GYUW2K401EBX0O	---NA---	1.4422	0.022889	1.1529	0.083028	0.5001	0.85789	0.25208	0.76705	0.56973	0.25327	0.70906	0.16557
GYUW2K401EBYBC	---NA---	-0.60095	0.5078	-0.26541	0.75063	-0.76071	0.78508	0.47199	0.64287	1.1758	0.1332	2.221	0.013774
GYUW2K401ED6SA	---NA---	0.28168	0.7262	0.72031	0.26262	0.11196	0.99999	0.69732	0.4093	0.66392	0.22277	1.5098	0.031332
GYUW2K401EDVTM	---NA---	1.2517	0.15452	1.1756	0.20624	0.61326	0.99999	1.6297	0.38339	1.7774	0.12951	2.0444	0.040992
GYUW2K401EEDOV	PTPRK_MOUSERecName: Full=Receptor-type tyrosine-protein phosphatase kappa; Short=Protein-tyrosine phosphatase kappa; Short=R-PTP-kappa; Flags: Precursor	2.8077	0.029459	0.65386	0.61457	1.1297	0.80651	0.084389	0.97881	-0.23079	0.88384	-0.35513	0.73887
GYUW2K401EFHGN	FSCN1_HUMANRecName: Full=Fascin; AltName: Full=55 kDa actin-bundling protein; AltName: Full=Singed-like protein; AltName: Full=p55	2.6515	0.017392	0.6375	0.51689	1.5234	0.40135	-0.051939	0.98306	-0.00031791	0.9997	0.50964	0.50321
GYUW2K401EFS9G	HMA7_ARATHRecName: Full=Copper-transporting ATPase RAN1; AltName: Full=Protein HEAVY METAL ATPASE 7; AltName: Full=Protein RESPONSIVE TO ANTAGONIST 1	2.9113	0.033462	1.4723	0.27458	1.6608	0.57754	0.77925	0.645	1.0772	0.34874	-0.41015	0.71747
GYUW2K401EIGCZ	---NA---	1.703	0.043986	2.1423	0.053433	1.1128	0.54122	0.21404	0.89257	0.3957	0.63331	0.93878	0.19124
GYUW2K401EIZTS	---NA---	0.73878	0.4905	1.7352	0.096405	0.072011	0.99999	1.557	0.38339	1.5974	0.12951	2.3094	0.029982
GYUW2K401EJAI8	---NA---	2.009	0.11252	2.8357	0.059588	1.5777	0.59967	1.4563	0.40275	2.5556	0.12951	3.3644	0.021087
GYUW2K401EKJD4	---NA---	3.4186	0.035874	1.0904	0.51141	2.6654	0.37913	-0.25536	0.9417	-0.35158	0.85633	0.11338	0.9394
GYUW2K401EL5K9	---NA---	3.6805	0.025564	2.0692	0.1879	2.217	0.46504	-1.028	0.62949	-0.65119	0.71426	-8.063	5.9853e-05
GYUW2K401ELJBN	---NA---	-3.1035	0.068062	-3.9488	0.053854	-2.7012	0.50876	-3.6802	0.12038	-4.0406	0.053527	-3.6194	0.029982
GYUW2K401EMGCA	---NA---	1.7699	0.029383	0.5986	0.45348	0.84812	0.68464	-0.032412	0.98763	-0.095856	0.9271	0.84276	0.19778
GYUW2K401EN9MD	---NA---	2.4662	0.029834	1.0931	0.32566	0.72135	0.99999	0.30344	0.87728	0.04552	0.97862	-0.8832	0.323
GYUW2K401ENPYF	---NA---	0.68762	0.29744	0.86044	0.19849	0.1603	0.99999	0.54465	0.50174	0.66077	0.23278	1.3991	0.048467
GYUW2K401ENT6E	---NA---	2.5801	0.049081	1.0318	0.44448	0.9252	0.97397	0.39866	0.86089	0.080424	0.96603	-0.96261	0.36825
GYUW2K401EO5EX	---NA---	1.8534	0.033926	1.7156	0.07613	1.2801	0.45993	0.41293	0.7244	0.38892	0.64435	1.3141	0.10139
GYUW2K401EOEVO	---NA---	1.5151	0.040595	1.0795	0.15748	1.0658	0.46504	0.27036	0.81308	0.21289	0.79774	0.61515	0.30296
GYUW2K401EP11X	---NA---	2.8833	0.022908	1.1417	0.33851	2.1664	0.29407	-0.45749	0.79678	-0.74542	0.48275	-0.98387	0.30451
GYUW2K401ERAFM	---NA---	-0.06441	0.96684	1.1995	0.20603	-0.1667	0.99999	1.0835	0.38453	1.1865	0.1627	2.0441	0.043927
GYUW2K401ERR7H	---NA---	1.8031	0.025942	0.79101	0.30327	1.4363	0.27996	0.066105	0.9728	-0.016338	0.9898	0.63042	0.30902
GYUW2K401ES5WP	---NA---	3.0234	0.03302	2.43	0.10086	2.2741	0.37913	0.53479	0.79558	0.48955	0.73778	0.16081	0.8973
GYUW2K401ES9TY	---NA---	2.0492	0.025564	0.85455	0.32303	1.4038	0.3885	-0.21551	0.89333	-0.061138	0.96026	0.9975	0.17644
GYUW2K401ESESB	---NA---	1.0428	0.24763	1.8516	0.071446	0.060993	0.99999	0.84813	0.47749	1.5324	0.12951	2.169	0.029982
GYUW2K401ET10M	---NA---	3.6728	0.0063364	3.7115	0.016319	1.7038	0.37462	0.46379	0.78029	0.60411	0.57193	-2.821	0.02647
GYUW2K401EWYOL	---NA---	0.40757	0.73769	1.3699	0.16921	-0.30942	0.99999	1.1771	0.38339	1.2464	0.15925	2.1012	0.045162
GYUW2K401EZEY0	---NA---	2.3793	0.023477	1.2358	0.21516	1.2406	0.56304	0.26243	0.88277	0.14009	0.91363	0.42643	0.59402
GYUW2K402F0HFR	---NA---	2.862	0.025942	1.5695	0.20381	1.9258	0.40472	-0.035295	0.99199	0.069489	0.97159	-1.0749	0.3245
GYUW2K402F171O	TRM1_SCHPORecName: Full=tRNA (guanine(26)-N(2))-dimethyltransferase; AltName: Full=tRNA 2,2-dimethylguanosine-26 methyltransferase; AltName: Full=tRNA(guanine-26,N(2)-N(2)) methyltransferase; AltName: Full=tRNA(m(2,2)G26)dimethyltransferase	3.0926	0.044561	1.6865	0.27532	0.92972	0.99999	0.21584	0.95815	0.25439	0.91046	-0.45905	0.75632
GYUW2K402F1TYM	---NA---	2.006	0.049305	0.39284	0.71301	0.68801	0.99526	-0.3528	0.83231	-0.50921	0.60876	0.17798	0.84517
GYUW2K402F1YU8	KDM2A_HUMANRecName: Full=Lysine-specific demethylase 2A; AltName: Full=CXXC-type zinc finger protein 8; AltName: Full=F-box and leucine-rich repeat protein 11; AltName: Full=F-box protein FBL7; AltName: Full=F-box protein Lilina; AltName: Full=F-box/LRR-repeat protein 11; AltName: Full=JmjC domain-containing histone demethylation protein 1A; AltName: Full=	2.1806	0.049353	0.80434	0.48615	1.0432	0.79325	0.28618	0.89141	0.93396	0.33013	-0.30746	0.75039
GYUW2K402F1Z8O	---NA---	2.477	0.027973	1.0243	0.34819	0.83318	0.91812	0.017722	0.99444	-0.14944	0.91698	0.15223	0.87544
GYUW2K402F2VUY	KN14R_ARATHRecName: Full=Kinesin-like protein KIN-14R	2.5376	0.02226	1.0253	0.31805	0.50459	0.99999	-0.093171	0.97177	0.52357	0.59218	0.50896	0.53684
GYUW2K402F3DR8	---NA---	0.80375	0.51823	2.1883	0.077467	0.67154	0.99999	1.671	0.38339	2.1958	0.12951	2.5816	0.032213
GYUW2K402F3FQN	3BP5H_DROMERecName: Full=SH3 domain-binding protein 5 homolog; AltName: Full=Protein parcase	2.9142	0.039117	1.0602	0.45819	1.0076	0.95339	-0.030387	0.99362	0.5114	0.72878	0.86195	0.44144
GYUW2K402F4JRJ	---NA---	2.4935	0.024336	0.88535	0.39832	0.82403	0.90431	-0.143	0.95134	-0.027444	0.9875	0.09684	0.91803
GYUW2K402F55V0	---NA---	1.4559	0.033134	1.2381	0.094074	0.74704	0.66189	0.30658	0.7415	0.45476	0.43918	0.89418	0.12971
GYUW2K402F602P	---NA---	-0.43703	0.68228	1.2023	0.17643	-1.0473	0.59586	1.5526	0.38339	1.7295	0.12951	2.1243	0.02665
GYUW2K402F688V	---NA---	-0.17421	0.89354	1.2094	0.21301	-0.48126	0.99999	1.2881	0.38339	1.3276	0.14071	2.2696	0.029982
GYUW2K402F6WF8	---NA---	1.6171	0.02226	0.5795	0.38297	1.2001	0.29407	0.18639	0.87191	0.29771	0.64505	0.61792	0.24926
GYUW2K402F7GQZ	---NA---	0.35253	0.68733	0.54323	0.45141	0.1847	0.99999	0.36421	0.7004	0.85534	0.17618	1.6885	0.029982
GYUW2K402F7NQK	---NA---	1.5778	0.045185	1.1443	0.16332	1.5026	0.27933	0.051014	0.97967	-0.30028	0.71655	-0.020447	0.97797
GYUW2K402F8249	---NA---	1.8547	0.031063	0.91027	0.2795	1.6324	0.2598	-0.085896	0.96712	-0.23156	0.80787	0.83856	0.22322
GYUW2K402F8FS9	---NA---	3.3512	0.040595	2.2314	0.13702	1.211	0.99999	-0.0076635	0.99862	0.066344	0.97773	-0.76462	0.54787
GYUW2K402F99FG	---NA---	2.5296	0.016807	1.1902	0.19412	1.6526	0.29188	0.16332	0.92946	0.012073	0.9936	0.25518	0.73839
GYUW2K402F9ADK	---NA---	2.4253	0.032458	1.4678	0.19425	1.2877	0.62499	0.035974	0.99032	-0.008023	0.99632	0.55966	0.52836
GYUW2K402F9MA9	---NA---	1.9611	0.049081	0.54877	0.60204	1.3403	0.53007	-0.37732	0.80657	-0.76563	0.37924	0.11077	0.90373
GYUW2K402FK2M2	---NA---	1.7084	0.029459	0.79222	0.29759	0.80058	0.70184	0.40865	0.68078	0.57951	0.37663	0.92286	0.16127
GYUW2K402FMK52	---NA---	1.633	0.046527	1.1864	0.16403	0.89411	0.68464	0.43782	0.68738	0.27951	0.75203	1.3777	0.08915
GYUW2K402FNCXI	S12A6_MOUSERecName: Full=Solute carrier family 12 member 6; AltName: Full=Electroneutral potassium-chloride cotransporter 3; AltName: Full=K-Cl cotransporter 3	3.5475	0.017513	3.0043	0.053854	1.5089	0.62499	1.1587	0.48719	1.3863	0.20937	-1.1714	0.26527
GYUW2K402FNN6X	SYAC_BOMMORecName: Full=Alanine--tRNA ligase, cytoplasmic; AltName: Full=Alanyl-tRNA synthetase; Short=AlaRS	1.3469	0.21843	1.9505	0.10086	1.129	0.7255	1.1221	0.43899	1.7736	0.12951	3.2846	0.0092158
GYUW2K402FOS11	---NA---	2.2031	0.022889	1.5836	0.10086	1.1482	0.55822	-0.15783	0.93321	0.04751	0.97104	0.36134	0.6263
GYUW2K402FSF7J	PCMD2_MOUSERecName: Full=Protein-L-isoaspartate O-methyltransferase domain-containing protein 2	2.8635	0.023579	0.92094	0.44484	1.6876	0.48033	-0.28268	0.90114	-0.46712	0.70158	-0.62588	0.51042
GYUW2K402FTZIL	---NA---	1.4313	0.1701	0.58341	0.60331	0.065445	0.99999	0.57546	0.68281	2.3708	0.12929	3.9185	0.00099417
GYUW2K402FVTXX	---NA---	0.57813	0.63166	1.2842	0.21261	-0.096892	0.99999	1.3965	0.38339	1.6959	0.12951	2.1584	0.048467
GYUW2K402FW6GJ	---NA---	-0.026871	0.97893	-0.6708	0.31777	-0.45213	0.99214	-0.022167	0.9901	1.8238	0.042431	2.2942	0.0018883
GYUW2K402FX3N3	---NA---	0.44372	0.84351	-0.52738	0.69371	-0.029101	0.99999	-3.9071	0.085583	-3.7009	0.056725	-4.1471	0.011623
GYUW2K402FXGAO	---NA---	1.7285	0.028205	0.51941	0.50776	0.79026	0.7121	-0.1666	0.91153	-0.062058	0.95438	0.33961	0.58228
GYUW2K402FXQ6C	---NA---	1.5706	0.026924	1.0981	0.12001	0.68774	0.72198	0.36231	0.68066	0.42561	0.4804	1.0771	0.095023
GYUW2K402FZMCC	---NA---	1.5336	0.049081	0.31252	0.70203	1.0619	0.52744	-0.3102	0.79172	-0.43306	0.55532	-0.0062328	0.9933
GYUW2K402FZZOC	---NA---	0.76717	0.50184	1.9086	0.093247	0.53528	0.99999	0.67409	0.58679	1.8369	0.12951	2.1944	0.048408
GYUW2K402G0UNR	---NA---	2.7962	0.04108	2.4314	0.09848	2.9637	0.18275	-0.20632	0.94565	1.2862	0.26591	2.3691	0.08492
GYUW2K402G23YC	---NA---	2.5241	0.021163	1.6599	0.10456	1.1991	0.57107	0.41738	0.76165	0.21914	0.84849	1.0244	0.20042
GYUW2K402G2SXR	---NA---	1.2105	0.04195	0.61387	0.30455	0.31013	0.99999	0.3259	0.6735	0.27432	0.63801	0.4897	0.30952
GYUW2K402G33UL	---NA---	0.16313	0.86673	1.2557	0.10743	0.99433	0.52654	0.81319	0.40562	1.2911	0.12951	2.4426	0.0027592
GYUW2K402G3AVD	---NA---	2.1654	0.025698	0.96264	0.29138	0.92645	0.72529	-0.041513	0.98644	-0.09612	0.93811	0.46321	0.52691
GYUW2K402G40KZ	---NA---	2.0143	0.044662	1.7083	0.10907	0.97512	0.76654	0.93183	0.48249	1.0906	0.20741	1.1935	0.17107
GYUW2K402G6G2W	HELZ2_HUMANRecName: Full=Helicase with zinc finger domain 2; AltName: Full=ATP-dependent helicase PRIC285; AltName: Full=Helicase with zinc finger 2, transcriptional coactivator; AltName: Full=PPAR-alpha-interacting complex protein 285; AltName: Full=PPAR-gamma DNA-binding domain-interacting protein 1; Short=PDIP1; Short=PPAR-gamma DBD-interacting protein 1; AltName: Full=Peroxisomal proliferator…	2.0453	0.040394	1.193	0.23383	1.8162	0.2938	-0.19899	0.92075	0.050742	0.97184	0.53944	0.49734
GYUW2K402G6GJY	---NA---	1.6458	0.041147	0.69885	0.39149	0.39861	0.99999	0.05349	0.97881	0.17534	0.85771	-0.41855	0.5186
GYUW2K402G78K1	---NA---	-0.12713	0.88663	-0.15619	0.82407	-0.42978	0.99999	0.5718	0.49393	2.3629	0.0047325	2.8137	0.00015622
GYUW2K402G7UW6	---NA---	1.7151	0.041935	0.5237	0.5529	0.63995	0.92594	-0.21972	0.8875	-0.18547	0.85597	0.095394	0.90079
GYUW2K402G8QSR	---NA---	1.0723	0.29566	-0.17702	0.87365	-0.051041	0.99999	0.54033	0.68573	2.3374	0.12576	3.3171	0.0032444
GYUW2K402G94W5	DUOX2_RATRecName: Full=Dual oxidase 2; AltName: Full=Large NOX 2; AltName: Full=Long NOX 2; AltName: Full=NADH/NADPH thyroid oxidase THOX2; AltName: Full=Thyroid oxidase 2; Flags: Precursor	1.7207	0.035102	1.2276	0.13963	0.56945	0.96642	0.37117	0.73982	0.53537	0.45168	0.68063	0.29566
GYUW2K402G9LOS	---NA---	2.1343	0.024919	0.73822	0.41284	1.0513	0.61703	0.077824	0.97259	0.31779	0.73635	0.69364	0.33574
GYUW2K402GACSR	---NA---	0.70822	0.38511	1.4203	0.095923	-0.16116	0.99999	0.71585	0.48332	1.255	0.12951	1.7396	0.040992
GYUW2K402GAYNR	---NA---	1.7639	0.029459	-0.37694	0.63871	0.040655	0.99999	-0.41342	0.68503	-0.16028	0.86634	-0.62572	0.31915
GYUW2K402GBRO7	BCR_HUMANRecName: Full=Breakpoint cluster region protein; AltName: Full=Renal carcinoma antigen NY-REN-26	1.9794	0.039893	0.75789	0.43404	1.5493	0.39011	-0.091429	0.96915	-0.46458	0.61361	0.53201	0.48745
GYUW2K402GCAFB	---NA---	1.3907	0.029834	0.55761	0.37515	0.7837	0.5657	-0.0052441	0.99759	-0.32409	0.58365	0.09627	0.86246
GYUW2K402GCIH2	---NA---	0.95288	0.18418	1.5582	0.062836	0.6275	0.85283	0.78565	0.41284	0.75011	0.22928	1.5659	0.049408
GYUW2K402GCLGV	---NA---	-0.027868	0.98812	1.8979	0.13501	0.045081	0.99999	1.5879	0.38339	2.1829	0.12951	3.1205	0.021087
GYUW2K402GD2BD	---NA---	0.4359	0.64008	1.1474	0.15423	-0.4333	0.99999	1.1392	0.38339	1.3788	0.12951	1.6984	0.044726
GYUW2K402GEV75	---NA---	2.4271	0.030806	2.934	0.042624	0.98899	0.80677	1.233	0.39593	1.8576	0.12951	1.8283	0.08915
GYUW2K402GEV8K	---NA---	2.8358	0.033134	0.96976	0.46539	1.2423	0.77444	0.041204	0.99068	-0.14841	0.93164	-0.83469	0.42189
GYUW2K402GF1S2	---NA---	1.7109	0.025942	0.89393	0.22456	0.98732	0.52585	0.14841	0.91965	0.25995	0.73583	0.77208	0.2025
GYUW2K402GGKR7	LRRC4_RATRecName: Full=Leucine-rich repeat-containing protein 4; AltName: Full=Netrin-G2 ligand; Short=NGL-2; Flags: Precursor	2.0119	0.048801	1.248	0.22948	1.2929	0.5657	-0.018928	0.9943	-0.35162	0.74913	-0.84602	0.30852
GYUW2K402GHVKN	---NA---	2.7247	0.027122	1.4947	0.21195	1.7893	0.44228	0.20678	0.9329	0.10303	0.95105	0.73307	0.43539
GYUW2K402GI47E	---NA---	1.9101	0.0295	1.042	0.2271	1.7549	0.22178	-0.35861	0.77137	-0.57339	0.44648	0.38638	0.57713
GYUW2K402GIA0Q	---NA---	2.7548	0.029459	0.79277	0.53455	1.3691	0.66189	-0.47788	0.79367	-0.24249	0.87281	-0.53012	0.59549
GYUW2K402GIEE5	---NA---	2.0099	0.033462	0.52244	0.59083	1.0152	0.67994	-0.35788	0.79685	-0.62598	0.44419	-0.71704	0.33825
GYUW2K402GKSM1	---NA---	1.7206	0.033953	1.248	0.13388	0.46224	0.99999	0.83505	0.42215	0.99441	0.16947	1.1204	0.11922
GYUW2K402GMI2O	ARNT_DROMERecName: Full=Aryl hydrocarbon receptor nuclear translocator homolog; Short=dARNT; AltName: Full=Hypoxia-inducible factor 1-beta; AltName: Full=Protein tango	1.8224	0.046527	1.3207	0.16513	1.4534	0.4084	1.2145	0.38339	1.3118	0.13695	0.68587	0.35727
GYUW2K402GMYYX	---NA---	3.1847	0.027122	3.5808	0.028111	0.44033	0.99999	1.9559	0.38339	1.8964	0.12951	0.40742	0.68873
GYUW2K402GNGU5	---NA---	1.6774	0.025942	1.1577	0.12252	1.1767	0.37913	0.11288	0.94219	0.25604	0.73378	0.82701	0.17637
GYUW2K402GONL8	---NA---	2.1656	0.046538	0.78855	0.48356	1.1496	0.70635	0.16153	0.94705	-0.32612	0.78851	0.73705	0.40253
GYUW2K402GPPPY	---NA---	1.9869	0.032004	1.3418	0.15222	2.062	0.15668	0.18112	0.92075	0.079226	0.95102	0.72296	0.32129
GYUW2K402GPQCB	---NA---	1.1895	0.049081	0.95275	0.13463	0.53244	0.83606	0.29718	0.72079	0.49258	0.34584	0.75711	0.15435
GYUW2K402GQCZD	---NA---	0.1702	0.85651	0.81283	0.26181	-0.23009	0.99999	0.61661	0.49675	0.98187	0.14523	1.7423	0.029245
GYUW2K402GQD8C	---NA---	1.4238	0.035874	0.53355	0.42999	0.76651	0.64829	-0.36042	0.67939	-0.26794	0.69601	0.010394	0.98694
GYUW2K402GR8H4	---NA---	2.4012	0.040595	0.28438	0.81647	0.85017	0.94739	-0.086525	0.97881	-0.9371	0.40761	-1.0961	0.29801
GYUW2K402GRAXW	---NA---	0.42053	0.60876	0.19724	0.7871	0.23963	0.99999	0.055631	0.97415	0.65208	0.26994	1.5426	0.042921
GYUW2K402GRQ0W	---NA---	6.8314	0.016719	1.5028	0.40107	0.15638	0.99999	1.1182	0.48719	1.0112	0.34443	1.405	0.18987
GYUW2K402GRVB5	---NA---	2.0176	0.027973	1.5808	0.096078	1.7933	0.22727	-0.16018	0.92967	-0.20298	0.84585	0.093276	0.90644
GYUW2K402GRXKF	---NA---	1.5713	0.033926	1.2637	0.10221	1.1321	0.42145	0.64032	0.48995	0.56473	0.3673	1.0912	0.10468
GYUW2K402GSV4B	ABCC9_RABITRecName: Full=ATP-binding cassette sub-family C member 9; AltName: Full=Sulfonylurea receptor 2	-0.61887	0.74026	-0.58502	0.61215	1.0505	0.96988	-3.796	0.053767	-3.7289	0.021626	-3.8263	0.0067493
GYUW2K402GTZUC	---NA---	2.1908	0.043999	1.5397	0.17175	1.9623	0.31446	0.34049	0.85325	-0.078581	0.95998	0.76356	0.38458
GYUW2K402GU072	---NA---	6.9824	0.02226	0.74975	0.70406	-0.12248	0.99999	-0.20116	0.9659	0.095874	0.97238	-1.0418	0.49592
GYUW2K402GUUJV	MEIS1_XENLARecName: Full=Homeobox protein Meis1; Short=XMeis1	2.5289	0.033462	1.1013	0.34927	1.7045	0.4641	-0.49389	0.76924	-0.8465	0.40331	-0.7895	0.3992
GYUW2K402GVY8Q	---NA---	0.44531	0.59924	0.55989	0.44841	0.16124	0.99999	0.28517	0.79184	1.0232	0.13881	1.7768	0.026661
GYUW2K402GX31Z	---NA---	2.3062	0.042547	0.29449	0.80359	0.33218	0.99999	0.46518	0.77822	0.14758	0.92204	0.069222	0.94749
GYUW2K402GX7VD	---NA---	1.59	0.049081	1.2164	0.15222	1.4334	0.33789	0.28546	0.82609	-0.051259	0.9647	0.64728	0.32727
GYUW2K402GXY4M	---NA---	2.2326	0.083045	3.6387	0.039963	1.0169	0.97836	1.2351	0.49997	0.80199	0.5579	-2.1773	0.10863
GYUW2K402H0ECI	---NA---	4.7132	0.02226	0.95384	0.46484	1.0731	0.99999	0.35651	0.87299	1.3335	0.22199	0.84553	0.4079
GYUW2K402H1H5E	---NA---	2.5278	0.017769	0.35571	0.71061	1.7577	0.27933	-0.84824	0.48371	-0.23624	0.82538	0.021133	0.98057
GYUW2K402H256F	---NA---	1.5923	0.043986	0.78878	0.32272	0.90402	0.64936	0.0060108	0.99796	-0.03887	0.97354	-0.24926	0.70938
GYUW2K402H5GA1	---NA---	0.36998	0.7883	1.3224	0.23468	-0.090893	0.99999	1.7158	0.38339	2.0286	0.12951	2.4547	0.040992
GYUW2K402H5YWZ	LIN1_NYCCORecName: Full=LINE-1 reverse transcriptase homolog	2.7267	0.033336	1.1709	0.3549	1.0863	0.83802	0.17985	0.94922	0.011613	0.9955	0.20029	0.85705
GYUW2K402H7YBB	---NA---	1.2217	0.038275	0.93081	0.1271	0.33626	0.99999	0.35453	0.62467	0.41319	0.41735	0.41945	0.37162
GYUW2K402H84F3	---NA---	1.8862	0.17048	1.6828	0.20275	0.29189	0.99999	1.5424	0.38339	1.6132	0.1408	2.7191	0.036542
GYUW2K402H96MJ	---NA---	2.2647	0.02226	1.1742	0.19172	1.3125	0.45984	0.49861	0.65665	0.35264	0.69601	0.47315	0.50232
GYUW2K402HA62A	---NA---	2.2753	0.044002	1.555	0.18196	0.5796	0.99999	1.2304	0.41019	1.3897	0.17438	1.7271	0.10249
GYUW2K402HA8W4	---NA---	-0.50155	0.75895	1.6665	0.20943	-0.90888	0.97334	1.961	0.38339	2.4221	0.12951	2.9492	0.038199
GYUW2K402HBSA0	---NA---	2.9175	0.02226	1.2712	0.2822	1.5983	0.52555	0.022796	0.99383	-0.21466	0.88552	-0.12171	0.90875
GYUW2K402HCUZI	RAB8A_PONABRecName: Full=Ras-related protein Rab-8A; Flags: Precursor	5.2607	0.017392	-0.92589	0.5043	0.40762	0.99999	-0.79789	0.58304	-1.1826	0.24577	-0.20691	0.84407
GYUW2K402HDAD1	---NA---	1.3723	0.037603	1.7314	0.045378	0.56281	0.84096	0.58927	0.48719	0.80598	0.1716	0.9012	0.12297
GYUW2K402HEVUG	---NA---	1.1126	0.17841	0.92502	0.27797	0.38699	0.99999	0.64975	0.52767	2.518	0.021626	2.1794	0.021087
GYUW2K402HIF3M	---NA---	1.841	0.022067	0.9512	0.19106	1.2233	0.34431	-0.18909	0.88394	-0.1184	0.89669	0.40112	0.48181
GYUW2K402HIU5P	---NA---	0.81457	0.51194	0.80004	0.48056	-1.0668	0.76607	0.4007	0.81485	2.0148	0.12951	3.2717	0.0092158
GYUW2K402HJ027	---NA---	1.6285	0.027787	0.97761	0.17714	0.74406	0.70152	0.62909	0.48719	0.55301	0.36189	0.5206	0.36072
GYUW2K402HJ7KO	---NA---	1.6922	0.027095	1.1524	0.13012	1.2467	0.34479	-0.055465	0.97544	-0.01381	0.99029	0.38415	0.51141
GYUW2K402HJI2C	---NA---	1.8254	0.048262	1.7109	0.094268	1.2055	0.55043	0.19876	0.91478	0.17662	0.87935	-0.20826	0.79659
GYUW2K402HK9OL	---NA---	2.1467	0.029494	1.402	0.15701	0.91312	0.77577	0.46351	0.72249	0.090435	0.94632	-0.26978	0.7417
GYUW2K402HLBKZ	---NA---	1.8279	0.049081	0.11118	0.91716	0.74146	0.90699	0.024058	0.99201	0.06402	0.96206	0.83064	0.27599
GYUW2K402HLE48	---NA---	0.84994	0.57345	1.7318	0.1061	-0.015821	0.99999	0.69423	0.51592	1.3666	0.12951	1.9957	0.046086
GYUW2K402HLG3F	---NA---	1.02	0.43908	1.7551	0.12763	0.55315	0.99999	1.7955	0.38339	1.454	0.15366	2.4613	0.040992
GYUW2K402HMA3Y	---NA---	2.4345	0.042995	1.2907	0.28569	1.2155	0.73341	-1.1888	0.45089	-0.79911	0.45467	0.028281	0.97999
GYUW2K402HMZSO	---NA---	2.5288	0.03811	0.57641	0.64368	1.2755	0.69854	-0.31476	0.887	-0.20374	0.89504	-0.57905	0.5522
GYUW2K402HNI5D	---NA---	1.2295	0.09141	1.279	0.10907	0.14473	0.99999	0.67895	0.48719	1.2041	0.12951	1.6433	0.044799
GYUW2K402HNSUM	---NA---	2.0114	0.033462	2.0318	0.057941	2.2524	0.15589	0.10161	0.96493	0.34162	0.72506	-0.14934	0.85584
GYUW2K402HOBOJ	---NA---	0.50295	0.44264	0.48036	0.43677	0.27905	0.99999	0.38426	0.60634	0.73897	0.17521	1.5087	0.02593
GYUW2K402HOKU9	---NA---	1.5862	0.036337	1.4337	0.086102	1.0375	0.49837	1.1505	0.38339	1.2378	0.12951	2.0862	0.013305
GYUW2K402HOL93	---NA---	0.14219	0.893	0.76096	0.32816	-0.66485	0.84753	1.4326	0.38339	1.7403	0.12929	2.0712	0.016528
GYUW2K402HOZ78	---NA---	1.5119	0.032055	0.9149	0.19395	0.59228	0.842	0.086942	0.95777	0.26055	0.71564	0.614	0.27063
GYUW2K402HPDO1	---NA---	2.7571	0.025942	0.75945	0.53226	1.1899	0.72529	-0.4276	0.81324	-0.64035	0.55642	-0.58556	0.53345
GYUW2K402HPE1I	---NA---	2.5948	0.011253	1.2749	0.14398	1.4678	0.33946	-0.39703	0.73262	-0.42331	0.60065	-0.35786	0.60354
GYUW2K402HR6LS	---NA---	0.57831	0.65914	0.89577	0.4126	-1.0012	0.79389	0.73625	0.57405	1.0779	0.23929	2.5367	0.032009
GYUW2K402HREOQ	---NA---	1.934	0.086865	1.937	0.057941	0.23686	0.99999	1.1008	0.38339	0.66203	0.3108	1.9822	0.02491
GYUW2K402HRSF8	OXR1_HUMANRecName: Full=Oxidation resistance protein 1	1.8833	0.046916	0.36441	0.71218	0.74047	0.91469	-0.03711	0.988	0.13091	0.91779	-0.35525	0.65372
GYUW2K402HRZHD	---NA---	3.1054	0.022889	1.2269	0.33862	0.84652	0.99526	0.46254	0.81476	0.60619	0.62307	-0.22552	0.84097
GYUW2K402HS4C9	---NA---	3.2056	0.033134	2.0909	0.16513	1.7337	0.60969	1.1466	0.51789	1.4733	0.23306	-0.48564	0.72494
GYUW2K402HSE01	---NA---	1.1963	0.4282	0.98855	0.49726	1.4667	0.71428	2.3326	0.38339	1.7877	0.16478	3.7779	0.016528
GYUW2K402HSUNB	RET_MOUSERecName: Full=Proto-oncogene tyrosine-protein kinase receptor Ret; AltName: Full=Proto-oncogene c-Ret; Contains: RecName: Full=Soluble RET kinase fragment; Contains: RecName: Full=Extracellular cell-membrane anchored RET cadherin 120 kDa fragment; Flags: Precursor	-1.6836	0.27124	0.00020131	0.99985	-1.4969	0.75629	2.7072	0.38339	2.6431	0.12951	3.3206	0.021087
GYUW2K402HTR32	---NA---	2.5615	0.029834	1.759	0.13935	1.8747	0.3882	0.30288	0.88527	0.076311	0.96279	1.0616	0.25567
GYUW2K402HTS6Q	---NA---	3.1645	0.038275	1.4241	0.35029	1.3515	0.81403	-0.10572	0.97783	-0.12926	0.95208	0.021464	0.98812
GYUW2K402HU1KR	---NA---	0.97008	0.17265	1.0158	0.17748	0.19273	0.99999	0.86336	0.38397	1.0704	0.13275	1.7516	0.029982
GYUW2K402HVIVQ	---NA---	4.181	0.02226	0.13182	0.91668	0.69263	0.99999	-1.0062	0.51121	-1.3404	0.21334	-0.37556	0.72111
GYUW2K402HW0UW	---NA---	3.2876	0.02226	2.9758	0.053854	1.2166	0.77893	0.25485	0.93197	0.6139	0.66727	-3.4254	0.029982
GYUW2K402HW47D	---NA---	1.4877	0.040595	0.23542	0.75227	0.98198	0.52555	0.00069245	0.99973	-0.29725	0.68667	0.1958	0.75349
GYUW2K402HX3TG	CHSS2_HUMANRecName: Full=Chondroitin sulfate synthase 2; AltName: Full=Chondroitin glucuronyltransferase 2; AltName: Full=Chondroitin-polymerizing factor; Short=ChPF; AltName: Full=Glucuronosyl-N-acetylgalactosaminyl-proteoglycan 4-beta-N-acetylgalactosaminyltransferase II; AltName: Full=N-acetylgalactosaminyl-proteoglycan 3-beta-glucuronosyltransferase II; AltName: Full=N-acetylgalactosaminyltra…	5.0616	0.0068663	-0.65117	0.49098	0.77667	0.99999	-1.4761	0.38339	-1.8305	0.12951	-1.8062	0.099267
GYUW2K402HYQ0D	---NA---	1.8972	0.02226	0.83841	0.26694	0.77523	0.71625	-0.14878	0.92193	0.0036258	0.99779	-0.22738	0.72078
GYUW2K402I0YDN	---NA---	1.5511	0.13288	0.71707	0.52092	0.48326	0.99999	0.71595	0.583	3.2698	0.021579	4.372	0.00023604
GYUW2K402I161D	---NA---	1.1292	0.31654	1.8901	0.10743	0.8009	0.95237	0.96375	0.49298	1.8843	0.12951	2.6999	0.027651
GYUW2K402I31J1	---NA---	1.231	0.105	1.1496	0.15722	0.22862	0.99999	0.72806	0.47974	1.3398	0.12951	2.1512	0.013774
GYUW2K402I4G0H	---NA---	2.7354	0.040595	0.89496	0.51809	1.7165	0.55148	-0.40117	0.86081	-0.61628	0.63668	-0.35558	0.75707
GYUW2K402I55X8	TNKS1_HUMANRecName: Full=Poly [ADP-ribose] polymerase tankyrase-1; AltName: Full=ADP-ribosyltransferase diphtheria toxin-like 5; Short=ARTD5; AltName: Full=Poly	-0.14723	0.95553	-0.51548	0.73866	-0.36604	0.99999	-4.0041	0.17964	-4.2871	0.052084	-4.2907	0.017492
GYUW2K402I5M0Z	YDGF_BACSURecName: Full=Uncharacterized transporter YdgF	-0.60309	0.80785	-0.15406	0.92592	0.50164	0.99999	-2.6349	0.38339	-2.3816	0.12951	-3.7549	0.031332
GYUW2K402I5V1S	---NA---	2.6607	0.025942	1.783	0.12936	1.2386	0.67407	0.53716	0.72762	0.13601	0.92808	0.70881	0.43112
GYUW2K402I5XGL	---NA---	3.0596	0.04896	-0.54521	0.6367	0.36417	0.99999	-0.99327	0.48873	-1.4946	0.15534	-1.51	0.13283
GYUW2K402I87J9	---NA---	1.7045	0.042137	0.59169	0.49429	1.0518	0.5691	-0.60316	0.55046	-0.39921	0.6242	0.68171	0.31589
GYUW2K402I8RB1	---NA---	2.7065	0.027787	0.89044	0.45626	1.041	0.82027	0.037286	0.99068	0.064296	0.96952	-0.43855	0.65204
GYUW2K402IAXX3	---NA---	1.8043	0.048801	0.77024	0.40784	1.1	0.60742	-0.28661	0.8536	0.015933	0.99129	0.94941	0.21337
GYUW2K402IBAGY	---NA---	1.5842	0.26936	2.1622	0.11887	-0.019276	0.99999	1.8447	0.38339	2.261	0.12951	3.3698	0.013544
GYUW2K402IBZLN	---NA---	2.7371	0.049081	0.868	0.55464	1.8305	0.54535	-0.41182	0.86658	-0.066035	0.97503	-0.47335	0.68683
GYUW2K402IC4V9	4CL3_DICDIRecName: Full=Probable 4-coumarate--CoA ligase 3; Short=4CL 3; AltName: Full=4-coumaroyl-CoA synthase 3	-2.0487	0.12353	-0.37234	0.77445	-1.2937	0.71625	0.041517	0.98848	0.86801	0.36756	2.7129	0.029982
GYUW2K402IDIPK	---NA---	0.84977	0.31329	2.361	0.028111	0.54258	0.99999	1.5754	0.38339	1.6364	0.12951	2.3497	0.012793
GYUW2K402IDNC5	---NA---	2.1677	0.025942	0.40864	0.66635	0.9482	0.71601	0.25515	0.8752	-0.060346	0.96315	-0.31784	0.6776
GYUW2K402IDUKM	---NA---	-0.56102	0.77889	1.7019	0.23513	-0.63331	0.99999	2.0971	0.38339	2.8896	0.12951	3.209	0.040421
GYUW2K402IE8K1	EGT1_NEUCRRecName: Full=Ergothioneine biosynthesis protein 1; Includes: RecName: Full=L-histidine N(alpha)-methyltransferase; Includes: RecName: Full=Hercynylcysteine S-oxide synthase	-0.11123	0.96274	-0.15504	0.91551	-0.19945	0.99999	-4.6189	0.053767	-5.3385	0.0060907	-4.7291	0.0067493
GYUW2K402IFHNG	---NA---	1.7501	0.027973	1.0859	0.16791	1.1101	0.46447	0.37903	0.71436	0.15212	0.87225	0.55682	0.36642
GYUW2K402IFXPB	---NA---	2.5615	0.011253	1.0337	0.21911	1.42	0.34479	-0.68948	0.50196	-0.63125	0.3781	-0.64643	0.33409
GYUW2K402IGSQJ	---NA---	1.557	0.049353	0.82438	0.30593	1.0289	0.55282	0.30439	0.80201	0.07025	0.95108	0.65809	0.31053
GYUW2K402IH0P3	---NA---	5.162	0.035881	0.24136	0.89791	-0.18123	0.99999	-0.83207	0.71594	-0.80886	0.61985	-0.35361	0.80957
GYUW2K402IHC1C	---NA---	1.4809	0.33545	0.54925	0.63036	-0.22376	0.99999	-1.6783	0.38339	-0.90677	0.33871	-2.6212	0.042092
GYUW2K402II3BZ	---NA---	2.1564	0.042137	1.9531	0.094685	2.0541	0.2598	-0.48392	0.74422	-0.68439	0.47019	-0.57316	0.50191
GYUW2K402IIC73	ASH1L_MOUSERecName: Full=Histone-lysine N-methyltransferase ASH1L; AltName: Full=ASH1-like protein; AltName: Full=Absent small and homeotic disks protein 1 homolog	2.6927	0.041658	1.0369	0.44034	1.4918	0.65731	0.29366	0.91018	-0.50084	0.71587	0.29865	0.79478
GYUW2K402IIQOX	---NA---	2.3353	0.027973	0.34243	0.74487	1.3144	0.55043	0.10564	0.96666	-0.017649	0.99129	0.63408	0.4366
GYUW2K402IJB7W	---NA---	0.99792	0.11836	0.80913	0.22754	0.23077	0.99999	0.61144	0.48236	0.92799	0.13939	1.4077	0.049993
GYUW2K402IJULQ	---NA---	2.2873	0.044561	1.9801	0.10393	1.6559	0.46504	-0.34452	0.86074	-0.87716	0.37404	-1.8	0.097436
GYUW2K402IK0YH	---NA---	0.9883	0.30424	0.95966	0.31508	0.22219	0.99999	1.0242	0.41166	1.7457	0.12951	2.6733	0.013267
GYUW2K402ILP3T	---NA---	2.0765	0.04195	0.74431	0.47848	1.0392	0.72586	-0.25825	0.89255	-0.47783	0.63214	-0.32281	0.70804
GYUW2K402IMWK5	---NA---	2.0552	0.044561	1.4245	0.1778	1.9981	0.2598	0.23443	0.90688	-0.31316	0.78241	0.18908	0.835
GYUW2K402INL4A	---NA---	4.3854	0.035854	2.9816	0.16044	2.099	0.72198	0.11786	0.98172	2.3589	0.18686	-2.4998	0.1608
GYUW2K402INXMI	---NA---	1.6528	0.03051	0.52284	0.49527	0.60899	0.88543	0.088864	0.96001	0.059948	0.95497	1.0319	0.1225
GYUW2K402IPL4U	---NA---	2.1803	0.054054	2.9966	0.047689	0.99807	0.8374	1.1496	0.44343	1.9354	0.12951	0.40828	0.66919
GYUW2K402IPLCM	---NA---	0.21864	0.80005	0.90813	0.19696	-0.07268	0.99999	0.33218	0.72363	0.82443	0.17769	1.5023	0.044726
GYUW2K402IQAYB	---NA---	1.3494	0.043999	0.81723	0.2296	1.1704	0.33946	-0.14472	0.91432	-0.16285	0.83671	0.31713	0.55998
GYUW2K402IQCNB	---NA---	0.16499	0.91969	2.0689	0.094685	-1.2806	0.65078	1.266	0.39671	1.6665	0.13253	2.4535	0.04477
GYUW2K402IQPZT	---NA---	2.1118	0.039573	0.63558	0.54961	0.88045	0.83977	-0.71471	0.55895	-0.64209	0.48095	-1.4336	0.11805
GYUW2K402IQZW7	---NA---	1.5565	0.049081	1.1972	0.14796	1.1628	0.46447	0.19588	0.89617	0.1632	0.86806	0.55431	0.38858
GYUW2K402ISES6	---NA---	2.3308	0.020432	1.117	0.21438	1.2589	0.48033	0.07736	0.97259	-0.2031	0.84694	-0.18917	0.80623
GYUW2K402IUFYS	---NA---	1.9401	0.026924	2.1124	0.053226	1.711	0.22178	-0.40821	0.7184	-0.53813	0.46881	0.30187	0.66275
GYUW2K402IUO4S	NIPLB_DANRERecName: Full=Nipped-B-like protein B	3.1741	0.022067	1.354	0.26998	1.6182	0.53345	-0.03003	0.99236	-0.18169	0.91022	-0.079335	0.94456
GYUW2K402IW3ZR	---NA---	2.5035	0.022889	1.0042	0.33071	1.5498	0.45003	0.1971	0.92406	0.45734	0.65215	-0.00070696	0.99955
GYUW2K402IWDET	---NA---	1.4531	0.11801	2.7433	0.028111	0.78096	0.89311	0.53347	0.66824	1.3453	0.14014	1.6753	0.08492
GYUW2K402IWVDP	---NA---	1.3578	0.09111	0.98823	0.24003	1.0297	0.57754	0.50933	0.6226	1.2572	0.13042	1.958	0.031665
GYUW2K402IWYP9	---NA---	2.5507	0.04016	0.98648	0.42987	1.1674	0.78179	0.23158	0.92627	0.0027698	0.99901	0.43562	0.67082
GYUW2K402IXHCB	---NA---	2.9665	0.03302	1.7288	0.2103	1.4103	0.71364	0.65014	0.72549	0.65114	0.61914	-0.081954	0.94818
GYUW2K402IXJS7	ATNA_DROMERecName: Full=Sodium/potassium-transporting ATPase subunit alpha; Short=Na(+)/K(+) ATPase alpha subunit; AltName: Full=Sodium pump subunit alpha	2.9255	0.034099	2.7495	0.073939	0.9153	0.99214	0.80855	0.63326	0.69578	0.59134	-1.6042	0.1709
GYUW2K402IYU7B	---NA---	0.34062	0.73908	1.5127	0.093647	-0.27349	0.99999	0.98081	0.38339	1.6465	0.12951	2.0455	0.023555
GYUW2K402IZ2HB	EXOS3_MOUSERecName: Full=Exosome complex component RRP40; AltName: Full=Exosome component 3; AltName: Full=Ribosomal RNA-processing protein 40	1.57	0.049081	1.2042	0.14951	1.2315	0.44034	-0.33517	0.77506	-0.0067339	0.99596	0.093499	0.89776
GYUW2K402IZE7N	---NA---	2.1201	0.049081	0.66673	0.55856	1.5575	0.48033	-0.076617	0.97762	-0.33094	0.7828	0.94916	0.28233
GYUW2K402IZOPH	---NA---	1.7939	0.033336	1.6211	0.079735	1.6472	0.24689	0.46447	0.66007	0.46485	0.54255	0.95252	0.17764
GYUW2K402J0MFQ	---NA---	1.5137	0.035881	0.81027	0.25762	0.92746	0.54458	-0.23298	0.84141	-0.18578	0.8201	0.21134	0.7261
GYUW2K402J0MUM	---NA---	2.5808	0.049081	0.41212	0.76302	1.3176	0.74092	0.37311	0.84894	-0.018166	0.9921	-0.8893	0.35136
GYUW2K402J11QN	KZ_DROMERecName: Full=Probable ATP-dependent RNA helicase kurz	2.1277	0.036058	1.9302	0.084866	1.4065	0.48466	0.66749	0.58203	0.44157	0.65541	0.99038	0.22684
GYUW2K402J3NHJ	---NA---	2.2961	0.02226	1.3562	0.1526	1.6516	0.30404	-0.44	0.72442	-0.43953	0.61869	-0.3853	0.6066
GYUW2K402J50UU	F177A_HUMANRecName: Full=Protein FAM177A1	2.8598	0.03712	1.2032	0.37836	1.3172	0.75943	0.008606	0.99839	0.098342	0.95962	0.8428	0.43627
GYUW2K402JA27V	---NA---	2.5922	0.039893	0.22858	0.86617	1.0597	0.85705	-0.066353	0.9839	-0.47024	0.71849	0.46326	0.65528
GYUW2K402JB1G0	---NA---	2.0182	0.027973	1.2631	0.16513	1.1146	0.56304	0.17076	0.92319	-0.13154	0.91002	0.95544	0.19562
GYUW2K402JBCME	---NA---	0.60164	0.68219	0.90949	0.45534	0.58598	0.99999	2.135	0.38339	1.3324	0.17142	2.353	0.048408
GYUW2K402JCIGT	---NA---	1.2591	0.041489	1.3184	0.061037	0.31878	0.99999	-0.012174	0.99379	0.47006	0.37845	0.56629	0.25977
GYUW2K402JE65I	XLRS1_MOUSERecName: Full=Retinoschisin; AltName: Full=X-linked juvenile retinoschisis protein homolog; Flags: Precursor	-4.4748	0.02226	-4.491	0.028111	-3.2103	0.18275	-0.93254	0.48371	-1.2768	0.1716	-1.2661	0.18661
GYUW2K402JE78S	---NA---	2.7485	0.047024	1.1873	0.39951	1.5255	0.68121	0.55792	0.78667	0.090115	0.96363	0.45713	0.69587
GYUW2K402JE87J	TPPC4_HUMANRecName: Full=Trafficking protein particle complex subunit 4; AltName: Full=Hematopoietic stem/progenitor cell protein 172; AltName: Full=Synbindin; AltName: Full=TRS23 homolog	1.6767	0.034923	1.903	0.053854	1.4735	0.27996	0.34411	0.75677	0.72303	0.27474	0.70794	0.2656
GYUW2K402JFFYC	---NA---	2.7921	0.017392	1.1218	0.27055	1.8994	0.27996	-0.41529	0.77997	-0.29487	0.79528	-0.93464	0.25688
GYUW2K402JFP89	---NA---	1.706	0.046233	1.074	0.21911	0.89936	0.71206	0.34306	0.78863	0.64036	0.3912	1.466	0.086596
GYUW2K402JHID4	---NA---	2.3336	0.048967	1.0421	0.38858	0.73542	0.99999	0.17478	0.94735	-0.040094	0.9835	0.80017	0.40402
GYUW2K402JIJXE	---NA---	-0.073332	0.96106	0.98117	0.28237	-0.79884	0.82829	1.2529	0.38339	2.1769	0.10228	1.9477	0.048467
GYUW2K402JJOBR	---NA---	1.999	0.047157	1.098	0.28083	0.69252	0.98608	0.48235	0.7293	0.34739	0.74913	0.7367	0.36787
GYUW2K402JJVCX	---NA---	2.2118	0.025942	0.97914	0.29626	1.6767	0.31446	-0.32205	0.83033	-0.61875	0.45619	0.01186	0.98924
GYUW2K402JKJVN	CAPSL_MOUSERecName: Full=Calcyphosin-like protein	3.4229	0.014997	3.0921	0.028111	1.102	0.68364	0.70991	0.55993	0.79615	0.3605	-2.6202	0.021087
GYUW2K402JL3LN	F16P2_RABITRecName: Full=Fructose-1,6-bisphosphatase isozyme 2; Short=FBPase 2; AltName: Full=D-fructose-1,6-bisphosphate 1-phosphohydrolase 2; AltName: Full=Muscle FBPase	-0.11433	0.94384	0.90651	0.3884	0.45762	0.99999	0.64522	0.61523	1.0558	0.23059	2.4343	0.032009
GYUW2K402JLY25	---NA---	2.9531	0.02226	1.14	0.32588	1.6764	0.46447	-0.12056	0.96652	-0.46296	0.6962	-0.15675	0.87995
GYUW2K402JM8KG	DPOG1_MOUSERecName: Full=DNA polymerase subunit gamma-1; AltName: Full=Mitochondrial DNA polymerase catalytic subunit; AltName: Full=PolG-alpha	3.0109	0.010014	0.88153	0.36139	1.8997	0.24934	-0.0055467	0.99857	-0.58859	0.4963	-0.18541	0.8258
GYUW2K402JM8TV	---NA---	2.5032	0.02226	1.4801	0.14543	1.6521	0.36892	0.29525	0.86081	0.20952	0.86032	0.5183	0.51057
GYUW2K402JMASI	---NA---	1.6559	0.049376	1.6059	0.09303	1.2981	0.44228	0.46462	0.67551	0.1572	0.8844	0.94449	0.19124
GYUW2K402JMQ4F	---NA---	2.9552	0.038275	1.5027	0.28792	1.6378	0.63406	0.49354	0.8254	0.50702	0.73362	1.0407	0.36117
GYUW2K402JMWL6	---NA---	1.7475	0.029494	0.77738	0.32092	0.94392	0.59586	-0.33958	0.76025	-0.31896	0.68822	0.51319	0.41192
GYUW2K402JO6ZG	---NA---	0.94236	0.36958	-0.16483	0.88267	-0.14145	0.99999	0.34536	0.83218	2.1967	0.12951	3.1383	0.0057288
GYUW2K402JPFKS	---NA---	1.7717	0.049081	1.068	0.24549	1.5152	0.37913	0.47462	0.6939	0.42268	0.63508	1.1194	0.15794
GYUW2K402JPJHS	---NA---	0.45348	0.65333	0.9257	0.26982	0.1798	0.99999	0.93292	0.39943	1.1234	0.14814	1.9834	0.029982
GYUW2K402JPXB8	---NA---	1.9476	0.040595	1.2263	0.20494	1.2669	0.52971	0.33552	0.82192	0.67947	0.41046	1.4196	0.10495
GYUW2K402JQ05I	---NA---	1.8369	0.025942	0.51127	0.52959	0.86951	0.6665	-0.15215	0.92317	-0.041803	0.97049	0.34103	0.59265
GYUW2K402JQQ8P	---NA---	2.2372	0.044662	1.3208	0.24428	0.96864	0.842	0.54437	0.72249	0.64454	0.53303	0.062684	0.95222
GYUW2K402JQSZO	---NA---	0.62655	0.53475	1.1706	0.19849	0.75017	0.86113	0.79559	0.48719	0.88695	0.23882	2.0466	0.03505
GYUW2K402JR3UE	RAY1_ARATHRecName: Full=Beta-arabinofuranosyltransferase RAY1; AltName: Full=Protein REDUCED ARABINOSE YARIV 1	-6.6812	0.043295	-6.6458	0.053854	-6.1056	0.27996	-2.8568	0.38339	-2.6498	0.17118	-2.9481	0.18362
GYUW2K402JRJZB	RPA43_SCHPORecName: Full=DNA-directed RNA polymerase I subunit rpa43; Short=RNA polymerase I subunit A43; AltName: Full=DNA-dependent RNA polymerase 19 kDa polypeptide	-0.36148	0.73704	1.0797	0.21442	-1.1101	0.5496	1.1034	0.38339	1.6922	0.12951	2.0334	0.029982
GYUW2K402JS1QO	---NA---	2.0471	0.03712	0.96641	0.32178	1.0447	0.689	-0.3087	0.84803	-0.63029	0.46557	-0.1918	0.82213
GYUW2K402JS6TX	---NA---	0.52059	0.59018	1.2779	0.13931	-0.27881	0.99999	-1.0484	0.38339	-0.32717	0.70257	-1.8777	0.039611
GYUW2K402JT540	---NA---	2.2471	0.029834	1.0848	0.28288	0.9412	0.78971	0.13786	0.95217	0.51423	0.59338	0.53951	0.50462
GYUW2K402JTQVV	EYS_DANRERecName: Full=Protein eyes shut homolog; Flags: Precursor	0.053056	0.98709	-0.23865	0.90133	-0.04565	0.99999	-0.81381	0.58223	-0.82925	0.44028	3.1021	0.046644
GYUW2K402JXCN4	---NA---	2.6269	0.019232	1.8658	0.087442	1.6976	0.33946	0.049316	0.98504	0.035867	0.9817	0.6605	0.3992
GYUW2K402JXG7F	---NA---	0.71771	0.48461	0.70663	0.45565	0.17484	0.99999	1.1858	0.38339	2.0562	0.12929	2.8923	0.0057288

## Sheet: Table S2
Table S2. List of significantly enriched (p < 0.05 Fisher's Exact Test, Blast2GO) GO Biological processes associated to the DEGs affected by each treatment. #Test: number of sequences in the test set relative to the corresponding GO term; #Ref: number of sequences in the reference set relative to the corresponding GO term.
Treatment	GO ID	GO Name	p-Value	# Test	# Ref	Test Set Sequences ID
WELGRO_100_21d	GO:0036211	protein modification process	0.0129807	2	4983
	GO:0009058	biosynthetic process	0.0352976	2	8218
	GO:0048856	anatomical structure development	0.0438996	2	9165
WELGRO_500_21d	GO:0022618	protein-RNA complex assembly	0.0130497	2	401
	GO:0009058	biosynthetic process	0.0161886	8	8212
	GO:0034641	cellular nitrogen compound metabolic process	0.0228284	7	6995
	GO:0006259	DNA metabolic process	0.0247118	3	1471
	GO:0006790	sulfur compound metabolic process	0.0418943	2	753
	GO:0006520	amino acid metabolic process	0.0442264	2	776

## Sheet: Table S3
Table S3. List of significantly differentially expressed pathways (q-value < 0.2, Pathview) following to 100, 500 and 1000 mg WELGRO/kg soil, for 2 and 21 days, separatelly. stat.mean: mean variation (across treatments), set.size: number of genes (KEGG orthologs) annotated to the pathway.
2 days
KEGG pathways (canonical pathways)	stat.mean	set.size	p.up	p.dn	p.val	q.val
ko04111 Cell cycle - yeast	2.18684	56	9.56343e-05	0.999904	0.000191269	0.0195094
ko04141 Protein processing in endoplasmic reticulum	1.78978	100	0.00105892	0.998941	0.00211785	0.0617201
ko03040 Spliceosome	1.6074	104	0.00280225	0.997198	0.00560451	0.0917384
ko04110 Cell cycle	1.58275	71	0.00327299	0.996727	0.00654598	0.0917384
ko03030 DNA replication	1.48492	37	0.00551343	0.994487	0.0110269	0.133591
ko03022 Basal transcription factors	1.47527	30	0.00589373	0.994106	0.0117875	0.133591
ko03420 Nucleotide excision repair	1.40765	40	0.0079901	0.99201	0.0159802	0.171577
ko04113 Meiosis - yeast	1.363	41	0.00974837	0.990252	0.0194967	0.180788
ko04725 Cholinergic synapse	-1.28908	34	0.986348	0.0136521	0.0273042	0.198931
ko02010 ABC transporters	-1.30829	32	0.987019	0.0129808	0.0259617	0.196155
ko04146 Peroxisome	-1.31241	61	0.987765	0.0122354	0.0244708	0.192001
ko01040 Biosynthesis of unsaturated fatty acids	-1.33898	19	0.987942	0.0120578	0.0241156	0.192001
ko00380 Tryptophan metabolism	-1.3701	27	0.989345	0.010655	0.0213101	0.181136
ko00350 Tyrosine metabolism	-1.3723	16	0.989752	0.0102485	0.0204969	0.181136
ko00260 Glycine, serine and threonine metabolism	-1.37704	32	0.99048	0.00951968	0.0190394	0.180788
ko04020 Calcium signaling pathway	-1.37719	52	0.991055	0.00894541	0.0178908	0.180788
ko01212 Fatty acid metabolism	-1.47227	41	0.994169	0.00583121	0.0116624	0.133591
ko01200 Carbon metabolism	-1.5755	92	0.996627	0.00337274	0.00674547	0.0917384
ko00640 Propanoate metabolism	-1.641	29	0.997299	0.00270083	0.00540166	0.0917384
ko02020 Two-component system	-1.65739	18	0.997065	0.00293514	0.00587029	0.0917384
ko01130 Biosynthesis of antibiotics	-1.66126	180	0.9979	0.00210035	0.00420071	0.0917384
ko00190 Oxidative phosphorylation	-1.66672	94	0.997657	0.00234319	0.00468639	0.0917384
ko04742 Taste transduction	-1.71386	12	0.997125	0.00287477	0.00574955	0.0917384
ko01110 Biosynthesis of secondary metabolites	-1.90643	268	0.999504	0.0004958	0.0009916	0.0337144
ko01100 Metabolic pathways	-1.97018	818	0.999674	0.000326181	0.000652363	0.0329869
ko00830 Retinol metabolism	-2.0371	16	0.999596	0.000404251	0.000808503	0.0329869
ko01120 Microbial metabolism in diverse environments	-2.05884	137	0.999802	0.000197613	0.000395226	0.0268754
ko04080 Neuroactive ligand-receptor interaction	-2.35352	67	0.999972	2.82944e-05	5.65888e-05	0.0115441
21 days
KEGG pathways (canonical pathways)	stat.mean	set.size	p.up	p.dn	p.val	q.val
ko04141 Protein processing in endoplasmic reticulum	2.39461	100	2.04198e-05	0.99998	4.08395e-05	0.00416563
ko00190 Oxidative phosphorylation	1.98569	94	0.000320523	0.999679	0.000641047	0.0261547
ko04260 Cardiac muscle contraction	1.93683	24	0.000576391	0.999424	0.00115278	0.0391946
ko04145 Phagosome	1.73348	46	0.00152839	0.998472	0.00305677	0.0714392
ko03420 Nucleotide excision repair	1.56136	40	0.00373942	0.996261	0.00747884	0.152568
ko04978 Mineral absorption	1.53908	12	0.00522375	0.994776	0.0104475	0.163945
ko04144 Endocytosis	1.49574	120	0.00491529	0.995085	0.00983059	0.163945
ko04011 MAPK signaling pathway - yeast	-1.51012	23	0.994829	0.00517063	0.0103413	0.163945
ko04742 Taste transduction	-1.80217	12	0.998424	0.00157586	0.00315173	0.0714392
ko01110 Biosynthesis of secondary metabolites	-1.8449	268	0.999282	0.000717735	0.00143547	0.0418337
ko00640 Propanoate metabolism	-2.03128	29	0.999696	0.00030371	0.000607421	0.0261547
ko01130 Biosynthesis of antibiotics	-2.07681	180	0.99983	0.000169923	0.000339845	0.0231095
ko02010 ABC transporters	-2.56647	32	0.999991	8.85422e-06	1.77084e-05	0.00361252
